# Supplementary material for: ARID1A loss in adult hepatocytes activates β-catenin-mediated erythropoietin transcription
Source: eLife journal article supplement (doi:10.7554/elife.53550), 2020-10-21
Supplement: supp [file elife-53550-supp-v1.zip]

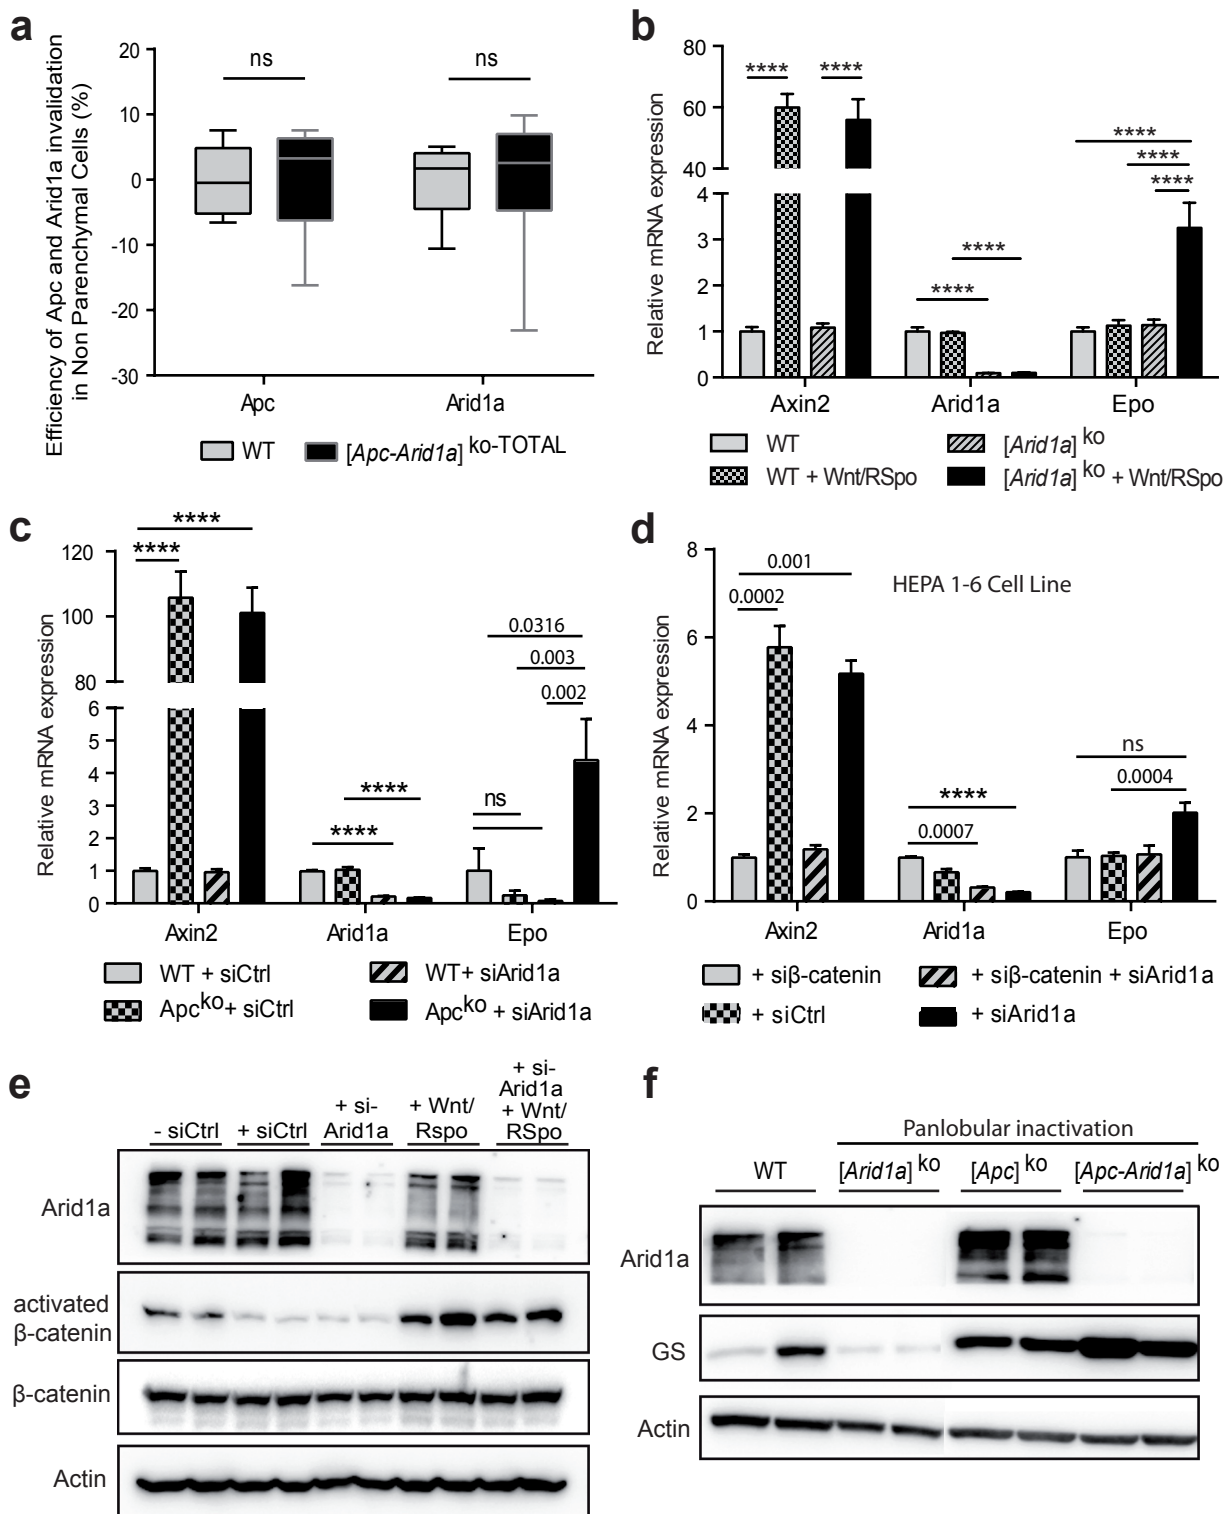

**Figure 5-figure Supplement 2: Cell-autonomous Epo expression after Arid1a invalidation and Wnt/ $\beta$ -catenin activation in hepatocytes**
