# Supplementary material for: ARID1A loss in adult hepatocytes activates β-catenin-mediated erythropoietin transcription
Source: eLife journal article supplement (doi:10.7554/elife.53550), 2020-10-21
Supplement: supp [file elife-53550-supp-v1.zip]

## GO\_ENDOTHELIUM\_DEVELOPMENT

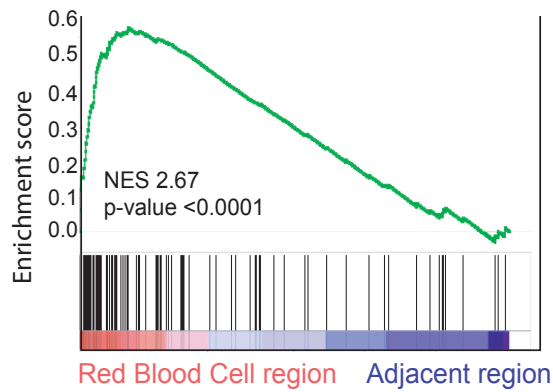

## GO\_ERYTHROCYTE\_HOMEOSTASIS

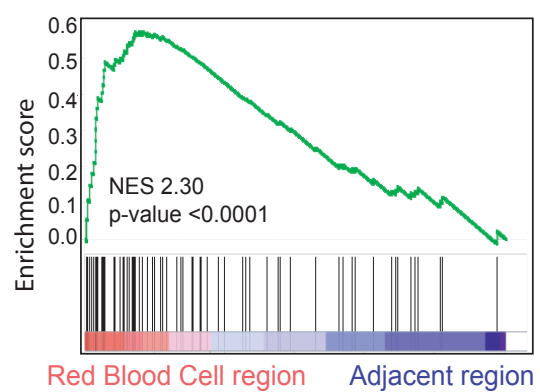

| HALLMARK UP in Red-Blood Cells regions     | ES         | NES              | NOM p-val    | FDR q-val    | FWER p-val |
|--------------------------------------------|------------|------------------|--------------|--------------|------------|
| HALLMARK_EPITHELIAL_MESENCHYMAL_TRANSITION | 0.6639565  | 3.1670182        | 0.0          | 0.0          | 0.0        |
| HALLMARK_UV_RESPONSE_DN                    | 0.6512214  | 3.012242         | 0.0          | 0.0          | 0.0        |
| HALLMARK_HYPOXIA                           | 0.6186533  | 2.9924495        | 0.0          | 0.0          | 0.0        |
| HALLMARK_MITOTIC_SPINDLE                   | 0.59132284 | 2.8535912        | 0.0          | 0.0          | 0.0        |
| HALLMARK_KRAS_SIGNALING_UP                 | 0.5668419  | 2.7204072        | 0.0          | 0.0          | 0.0        |
| HALLMARK_TNFA_SIGNALING_VIA_NFKB           | 0.55479527 | 2.680036         | 0.0          | 0.0          | 0.0        |
| HALLMARK_APOPTOSIS                         | 0.55303276 | 2.6274893        | 0.0          | 0.0          | 0.0        |
| HALLMARK_APICAL_JUNCTION                   | 0.5446991  | 2.604809         | 0.0          | 0.0          | 0.0        |
| <b>HALLMARK_ANGIOGENESIS</b>               | 0.71163845 | <b>2.5649526</b> | 0.0          | 0.0          | 0.0        |
| HALLMARK_HEDGEHOG_SIGNALING                | 0.7251374  | 2.5461335        | 0.0          | 0.0          | 0.0        |
| HALLMARK_IL6_JAK_STAT3_SIGNALING           | 0.58842963 | 2.5292919        | 0.0          | 0.0          | 0.0        |
| HALLMARK_TGF_BETA_SIGNALING                | 0.6447446  | 2.5034444        | 0.0          | 0.0          | 0.0        |
| HALLMARK_INFLAMMATORY_RESPONSE             | 0.52055204 | 2.491655         | 0.0          | 0.0          | 0.0        |
| HALLMARK_IL2_STAT5_SIGNALING               | 0.5074148  | 2.4824617        | 0.0          | 0.0          | 0.0        |
| <b>HALLMARK_WNT_BETA_CATENIN_SIGNALING</b> | 0.6606939  | <b>2.4021647</b> | 0.0          | 0.0          | 0.0        |
| HALLMARK_G2M_CHECKPOINT                    | 0.48979887 | 2.3374486        | 0.0          | 0.0          | 0.0        |
| HALLMARK_COMPLEMENT                        | 0.46746165 | 2.244619         | 0.0          | 0.0          | 0.0        |
| HALLMARK_ALLOGRAFT_REJECTION               | 0.44564682 | 2.155567         | 0.0          | 0.0          | 0.0        |
| HALLMARK_NOTCH_SIGNALING                   | 0.55996865 | 1.9037458        | 0.0          | 0.0          | 0.0        |
| HALLMARK_P53_PATHWAY                       | 0.38902906 | 1.8674575        | 0.0          | 1.5E-4       | 0.001      |
| HALLMARK_PROTEIN_SECRETION                 | 0.42872855 | 1.8476093        | 0.0          | 1.4285714E-4 | 0.001      |
| HALLMARK_APICAL_SURFACE                    | 0.4894085  | 1.8031044        | 0.0033333334 | 6.209415E-4  | 0.004      |
| HALLMARK_MYOGENESIS                        | 0.36306673 | 1.7582084        | 0.0          | 0.001129307  | 0.009      |
| HALLMARK_INTERFERON_GAMMA_RESPONSE         | 0.35427076 | 1.6743121        | 0.0          | 0.0026467869 | 0.021      |
| HALLMARK_E2F_TARGETS                       | 0.34658998 | 1.6523538        | 0.0          | 0.003356201  | 0.026      |
| HALLMARK_COAGULATION                       | 0.35150105 | 1.6117672        | 0.0          | 0.005700038  | 0.044      |
| HALLMARK_ESTROGEN_RESPONSE_EARLY           | 0.3343408  | 1.5874816        | 0.0          | 0.008059046  | 0.062      |
| HALLMARK_ANDROGEN_RESPONSE                 | 0.3552603  | 1.5586816        | 0.0037453184 | 0.009816989  | 0.075      |
| HALLMARK_GLYCOLYSIS                        | 0.30766937 | 1.4816154        | 0.005        | 0.015494478  | 0.117      |

| HALLMARK DOWN in Red-Blood Cells regions | ES          | NES        | NOM p-val | FDR q-val    | FWER p-val |
|------------------------------------------|-------------|------------|-----------|--------------|------------|
| HALLMARK_BILE_ACID_METABOLISM            | -0.64162886 | -2.568872  | 0.0       | 0.0          | 0.0        |
| HALLMARK_OXIDATIVE_PHOSPHORYLATION       | -0.5970052  | -2.5572693 | 0.0       | 0.0          | 0.0        |
| HALLMARK_FATTY_ACID_METABOLISM           | -0.59398675 | -2.4620473 | 0.0       | 0.0          | 0.0        |
| HALLMARK_XENOBIOTIC_METABOLISM           | -0.51525337 | -2.1865377 | 0.0       | 0.0          | 0.0        |
| HALLMARK_ADIPOGENESIS                    | -0.41381854 | -1.7683779 | 0.0       | 8.661275E-4  | 0.015      |
| HALLMARK_PEROXISOME                      | -0.4109769  | -1.6020246 | 0.0       | 0.0048047835 | 0.097      |

**Figure 2-figure Supplement 1: Transcriptional signatures in [Apc-Arid1a]<sup>ko-focal</sup> mice**
