# Supplementary material for: ARID1A loss in adult hepatocytes activates β-catenin-mediated erythropoietin transcription
Source: eLife journal article supplement (doi:10.7554/elife.53550), 2020-10-21
Supplement: supp [file elife-53550-supp-v1.zip]

Archive with 30 entries (30 files):
- elife_poa_e53550_Transparent_Reporting_File.docx
- elife_poa_e53550_Figure_1_figure_supplement_1.jpg
- elife_poa_e53550_Figure_1_figure_supplement_2.jpg
- elife_poa_e53550_Figure_1_figure_supplement_3.jpg
- elife_poa_e53550_Figure_1_figure_supplement_4.jpg
- elife_poa_e53550_Figure_2_figure_supplement_1.pdf
- elife_poa_e53550_Figure_3_figure_supplement_1.jpg
- elife_poa_e53550_Figure_4_figure_supplement_1.pdf
- elife_poa_e53550_Figure_5_figure_supplement_1.pdf
- elife_poa_e53550_Figure_5_figure_supplement_2.pdf
- elife_poa_e53550_Figure_6_figure_supplement_1.jpg
- elife_poa_e53550_Figure_7_figure_supplement_1.jpg
- elife_poa_e53550_Figure_7_figure_supplement_2.jpg
- elife_poa_e53550_Figure_8_figure_supplement_1.pdf
- elife_poa_e53550_Figure_8_figure_supplement_2.jpg
- elife_poa_e53550_Figure_1_source_data_1.xlsx
- elife_poa_e53550_Figure_1_source_data_2.xlsx
- elife_poa_e53550_Figure_1_source_data_3.xlsx
- elife_poa_e53550_Figure_2_source_data_1.xlsx
- elife_poa_e53550_Figure_3_source_data_1.xlsx
- elife_poa_e53550_Figure_4_source_data_1.xlsx
- elife_poa_e53550_Figure_5_source_data_1.xlsx
- elife_poa_e53550_Figure_5_source_data_2.xlsx
- elife_poa_e53550_Figure_5_source_data_3.xlsx
- elife_poa_e53550_Figure_7_source_data_1.xlsx
- elife_poa_e53550_Figure_7_source_data_2.xlsx
- elife_poa_e53550_Figure_7_source_data_3.xlsx
- elife_poa_e53550_Figure_8_source_data_1.xlsx
- elife_poa_e53550_Figure_8_source_data_2.xlsx
- elife_poa_e53550_Figure_8_source_data_3.xlsx
