# Supplementary material for: ARID1A loss in adult hepatocytes activates β-catenin-mediated erythropoietin transcription
Source: eLife journal article supplement (doi:10.7554/elife.53550), 2020-10-21
Supplement: supp [file elife-53550-supp-v1.zip › elife_poa_e53550_Figure_1_source_data_1.xlsx]

## Sheet: Figure 1
Figure 1c: Emergence of peliosis
	Days	Double ko	Wt
	215	1
	195	1
	139	1
	188	1
	212	1
	288	1
	261	1
	180	1
	149	1
	226	1
	195	1
	167	1
	154	1
	154	1
	206	1
	206	1
	199	1
	262	1
	298	1
	199	1
	199	1
	222	1
	189	1
	221	1
	298		0
	298		0
	298		0
	298		0
	298		0
	298		0
	298		0
	298		0
	298		0
	298		0
Figure 1d: Survival
Months	WT	Double ko
14.6	1
14.6	1
14.6	1
14.6	1
14.6	1
14.6	1
6.73333		0
7.56667		0
9.93333		0
13.6667		0
13.8333		0
14.3667		0
