# Supplementary material for: ARID1A loss in adult hepatocytes activates β-catenin-mediated erythropoietin transcription
Source: eLife journal article supplement (doi:10.7554/elife.53550), 2020-10-21
Supplement: supp [file elife-53550-supp-v1.zip › elife_poa_e53550_Figure_1_source_data_2.xlsx]

## Sheet: Figure1_S1
Figure S1a	Liver to body weight ratio in focal knock-outs
Raw data	WT	[Apc]ko	[Arid1a]ko	[Apc-Arid1a]ko			Ordinary one-way analysis
	4.77941	4.47	4.23	5.05			Alpha	0.05
	4.96183	4.15094	4.04	5.57
	4.92537	4.60427	4.28	6.27			Tukey's multiple comparisons test	Mean Diff.	95% CI of diff.	Significant?	Summary	Adjusted P Value
	4.20067	7.95394	4.24	5.41
	4.25953	4.69962	4.55	5.24			WT vs. [Apc]ko	-0.4971	-1.395 to 0.4006	No	ns	0.4624
	4.34894	5.025	5.44	4.58			WT vs. [Arid1a]ko	-0.1941	-0.9982 to 0.6101	No	ns	0.9182
	4.96304	4.74986	4.74	4.66			WT vs. [Apc-Arid1a]ko	-0.8204	-1.618 to -0.02279	Yes	*	0.0416
	4.64688	5.16854	5	5.57			[Apc]ko vs. [Arid1a]ko	0.303	-0.4434 to 1.049	No	ns	0.7043
		5.14437	5.39	4.82			[Apc]ko vs. [Apc-Arid1a]ko	-0.3233	-1.063 to 0.4160	No	ns	0.6536
		5.36138	4.52	5.97			[Arid1a]ko vs. [Apc-Arid1a]ko	-0.6263	-1.249 to -0.003864	Yes	*	0.0481
			4.73	5.76
			5.15	5.6691
			4.7	5.81088
			6.09025	5.36796
			5.3366	3.73457
			5.02776	4.67847
			4.9413	6.7711
			4.53	5.99556
				6.73833
Figure S1b	qPCR expression of beta-catenin target genes in focal knock-outs
Table Analyzed	Glul						Axin 2
Raw data	WT	Apc ko	Arid1a ko	Doube ko				WT	Apc ko	Arid1a ko	Doube ko
	0.962882	1.14111	1.03557	1.27494				2.00884	0.99059	1.41555	7.97984
	0.930083	0.972946	1.24008	0.99339				0.930682	0.868357	2.14557	2.0869
	1.01426	1.37595	1.34297	1.33833				0.914693	1.81046	2.16049	8.97779
	1.2487	1.25304	1.20199	1.69988				0.838777	4.64719	1.51715	6.06858
	0.844068	1.89925	1.11376	1.41955				0.307011	7.06829	1.27576	5.21028
		1.32448	0.849939	1.43438					1.58706	0.655815	3.1962
		1.87961	0.867798	1.37119					1.87431	1.17802	3.42561
			0.763358	1.72959						0.399526	8.14752
			0.949626	1.81558						0.917869	8.55258
			0.910942	1.31534						0.655815	1.07651
			0.692762							3.1962
			0.876868							3.42561
Ordinary one-way analysis
Alpha	0.05						Ordinary one-way analysis
							Alpha	0.05
Tukey's multiple comparisons test	Mean Diff.	95% CI of diff.	Significant?	Summary	Adjusted P Value		Tukey's multiple comparisons test	Mean Diff.	95% CI of diff.	Significant?	Summary	Adjusted P Value
WT vs. Apc ko	-0.4066	-0.8013 to -0.01196	Yes	*	0.0415		WT vs. Apc ko	-1.692	-4.873 to 1.488	No	ns	0.4811
WT vs. Arid1a ko	0.01286	-0.3459 to 0.3716	No	ns	0.9997		WT vs. Arid1a ko	-0.5786	-3.470 to 2.312	No	ns	0.9474
WT vs. Doube ko	-0.4392	-0.8084 to -0.07004	Yes	*	0.0149		WT vs. Doube ko	-4.472	-7.447 to -1.497	Yes	**	0.0016
Apc ko vs. Arid1a ko	0.4195	0.09892 to 0.7401	Yes	**	0.0066		Apc ko vs. Arid1a ko	1.114	-1.469 to 3.697	No	ns	0.6485
Apc ko vs. Doube ko	-0.03259	-0.3648 to 0.2996	No	ns	0.9932		Apc ko vs. Doube ko	-2.78	-5.456 to -0.1033	Yes	*	0.0395
Arid1a ko vs. Doube ko	-0.4521	-0.7407 to -0.1635	Yes	**	0.001		Arid1a ko vs. Doube ko	-3.894	-6.219 to -1.568	Yes	***	0.0005
