# Supplementary material for: ARID1A loss in adult hepatocytes activates β-catenin-mediated erythropoietin transcription
Source: eLife journal article supplement (doi:10.7554/elife.53550), 2020-10-21
Supplement: supp [file elife-53550-supp-v1.zip › elife_poa_e53550_Figure_1_source_data_3.xlsx]

## Sheet: Figure1_S3
Figure S1b	qPCR expression of angiogenic mRNAs in focal knock-outs
	WT					[Apc] ko-focal							[Arid1a] ko-focal												[Apc-Arid1a] ko-focal
Angptl2	1.03119	1.07126	0.861137	1.17228	0.864127	0.855189	0.699461	0.843415	0.935828	0.96883	0.711687	0.834692	1.44825	1.02763	1.29622	1.48897	1.13235	0.74707	0.704326	0.8946	0.919751	1.02053	0.598455	0.817514	1.60138	1.74028	1.86518	1.5522	1.49933	1.19691	1.95791	1.75846	1.563	1.74028
Ephb4	1.13721	0.662276	1.03563	1.46968	0.695202	1.21462	1.05008	1.2928	1.50056	2.2509	0.898446	1.72968	1.07587	1.22731	1.19375	1.2531	1.42949	1.40494	1.21042	0.858865	0.771375	0.7555	0.867842	0.83538	1.8283	1.10229	3.2389	2.37925	1.24877	1.65348	1.58064	2.40411	2.45463	1.10996
Flt1	0.985814	0.58414	0.762805	1.13633	1.53091	0.939123	0.897751	1.97163	1.84598	2.20287	1.13633	2.17255	1.14424	0.910283	1.07504	0.888465	0.846385	1.31438	0.786973	0.972242	1.64648	1.80799	0.903995	0.7292	3.92961	1.42839	5.73338	3.8621	1.88477	2.4956	2.21052	4.01218	4.8045	1.46854
Pdgfra	0.67701	0.769636	0.90579	1.02615	1.62141	1.20351	0.567325	1.9416	3.38053	3.05728	1.38247	2.4576	0.964096	0.713136	1.06234	1.40177	1.16655	1.00853	0.614399	1.01907	1.40177	2.20725	0.64049		10.0369	3.09996	19.057	12.1868	4.6824	5.21349	4.93226	9.3648	13.6634	1.50238
Tgfb	1.00602	0.800328	0.632293	0.971755	1.5896	0.869745	0.819982	1.07078	1.02361	2.02604	0.894197	1.84506	1.23001	0.961704	1.23001	1.03431	0.884948	0.706452	0.645578	0.831429	1.75159	1.75159	0.900416	0.843035	1.4376	1.72747	2.86526	1.68024	1.99815	1.54078	2.32731	1.87731	2.00509	1.29116
Vcam1	0.748266	0.766641	0.717785	0.658212	2.10909	1.0509	0.549665	1.43557	1.58735	1.73102	0.529104	2.38936	1.19055	0.804756	0.994211	0.722778	0.830254	0.774654	0.52182	1.2411	3.64678	2.16089	0.637998	0.911695	1.25408	1.20299	2.60561	2.24486	0.81599	1.63765	2.51686	1.34875	3.55938	1.53328
Vegfa	1.05586	0.945024	0.585777	1.19203	1.2213	1.11607	1.17562	1.15542	1.00935	1.54053	0.97835	0.941754	1.03413	0.935249	0.842894	0.903391	0.733782	0.656753	1.14347	1.89005	0.814182	1.32723	0.822691	0.85466	1.63969	1.60594	1.62273	1.8705	1.03772	1.4829	2.0187	1.94993	2.94532	1.26437
	Angptl2						Ephb4						Flt1						Pdgfra						Tgfb						Vcam1						Vegfa
Ordinary one-way ANOVA
Alpha	0.05						0.05						0.05						0.05						0.05						0.05						0.05
Tukey's multiple comparisons test	Mean Diff.	95% CI of diff.	Significant?	Summary	Adjusted P Value		Mean Diff.	95% CI of diff.	Significant?	Summary	Adjusted P Value		Mean Diff.	95% CI of diff.	Significant?	Summary	Adjusted P Value		Mean Diff.	95% CI of diff.	Significant?	Summary	Adjusted P Value		Mean Diff.	95% CI of diff.	Significant?	Summary	Adjusted P Value		Mean Diff.	95% CI of diff.	Significant?	Summary	Adjusted P Value		Mean Diff.	95% CI of diff.	Significant?	Summary	Adjusted P Value
WT vs. [Apc-Arid1a] ko-focal	-0.6475	-0.9762 to -0.3188	Yes	****	< 0.0001		-0.9	-1.609 to -0.1906	Yes	**	0.0087		-2.183	-3.510 to -0.8562	Yes	***	0.0006		-7.374	-12.01 to -2.739	Yes	***	0.0009		-0.875	-1.508 to -0.2425	Yes	**	0.0039		-0.8719	-2.060 to 0.3156	No	ns	0.2119		-0.7438	-1.298 to -0.1891	Yes	**	0.0052
WT vs. [Apc] ko-focal	0.1644	-0.1870 to 0.5158	No	ns	0.5872		-0.4196	-1.178 to 0.3388	No	ns	0.4476		-0.5952	-2.014 to 0.8232	No	ns	0.6676		-0.9986	-5.954 to 3.957	No	ns	0.9461		-0.2213	-0.8975 to 0.4548	No	ns	0.81		-0.3247	-1.594 to 0.9449	No	ns	0.898		-0.131	-0.7240 to 0.4620	No	ns	0.931
WT vs. [Arid1a] ko-focal	-0.007972	-0.3274 to 0.3115	No	ns	0.9999		-0.07365	-0.7631 to 0.6158	No	ns	0.9913		-0.08547	-1.375 to 1.204	No	ns	0.9979		-0.109	-4.673 to 4.455	No	ns	0.9999		-0.06425	-0.6789 to 0.5504	No	ns	0.9918		-0.2031	-1.357 to 0.9510	No	ns	0.9633		0.003459	-0.5356 to 0.5425	No	ns	> 0.9999
[Apc-Arid1a] ko-focal vs. [Apc] ko-focal	0.8119	0.5162 to 1.108	Yes	****	< 0.0001		0.4804	-0.1579 to 1.119	No	ns	0.194		1.588	0.3941 to 2.781	Yes	**	0.0056		6.375	2.205 to 10.55	Yes	**	0.0014		0.6537	0.08459 to 1.223	Yes	*	0.0195		0.5472	-0.5213 to 1.616	No	ns	0.5136		0.6128	0.1137 to 1.112	Yes	*	0.0115
[Apc-Arid1a] ko-focal vs. [Arid1a] ko-focal	0.6395	0.3826 to 0.8965	Yes	****	< 0.0001		0.8264	0.2718 to 1.381	Yes	**	0.0018		2.097	1.060 to 3.135	Yes	****	< 0.0001		7.265	3.567 to 10.96	Yes	****	< 0.0001		0.8108	0.3163 to 1.305	Yes	***	0.0006		0.6688	-0.2596 to 1.597	No	ns	0.226		0.7472	0.3136 to 1.181	Yes	***	0.0003
[Apc] ko-focal vs. [Arid1a] ko-focal	-0.1724	-0.4578 to 0.1130	No	ns	0.3712		0.3459	-0.2701 to 0.9620	No	ns	0.4346		0.5097	-0.6423 to 1.662	No	ns	0.6297		0.8896	-3.202 to 4.981	No	ns	0.9336		0.1571	-0.3921 to 0.7063	No	ns	0.8639		0.1216	-0.9096 to 1.153	No	ns	0.9884		0.1345	-0.3472 to 0.6161	No	ns	0.872
