# Supplementary material for: ARID1A loss in adult hepatocytes activates β-catenin-mediated erythropoietin transcription
Source: eLife journal article supplement (doi:10.7554/elife.53550), 2020-10-21
Supplement: supp [file elife-53550-supp-v1.zip › elife_poa_e53550_Figure_2_source_data_1.xlsx]

## Sheet: Figure 2
Figure 2c Gene expression
	Adjacent region										Red Blood Cell region
GS	1.15676	1.68189	1.78396	0.364777	0.493146	0.519461	0.65976	0.416103	0.294229	2.62991	2.29753	3.68097	2.58486	1.13295	2.65753	1.3614	1.82768	1.23115	1.21842	3.78426
Axin2	2.18042	0.671103	0.75503	0.584229	0.809221	1.24434	0.943037	0.44147	1.37115		24.5833	44.3114	27.2768	13.8768	25.8951	23.3506	28.254	17.2723	58.9078
CyclinD1	1.81136	1.04035	1.22016	0.473709	0.454412	0.271625	0.396306	0.128486	3.20358		3.88274	3.67329	8.35173	1.69593	1.49182	2.54857	1.52593	0.962385	5.0795
Angptl2	1.94762	1.7984	1.19476	0.193006	0.386011	0.480203	0.51791	1.30656	0.327774	1.84776	3.6344	2.43972	1.17831	1.82984	3.10957	2.90133	2.1447	3.49617	2.6313	3.8126
Flt1	1.18355	1.4929	1.96308	0.204209	0.430212	0.72604	0.525434	0.261808	0.589098	2.62366	7.12614	16.3149	12.3216	2.86418	2.64473	5.10928	4.9988	4.00439	1.46569	15.3651
Pdgfra	1.8382	2.08969	1.34564	0.100015	0.202121	0.424339	1.07014	0.839616	0.351794	1.73845	29.5132	30.343	19.8806	6.8842	11.7394	22.2124	8.38494	8.80182	3.91172	24.8953
Vegfa	1.14129	1.29295	1.89299	0.144653	0.537996	0.990115	0.540788	0.31168	0.202801	2.94473	7.16352	12.1735	6.56898	1.62526	2.1077	4.96113	4.29642	3.03803	1.13929	9.66745
	Figure 2f			Figure 2c
	GS (Glul)	Axin2	CyclinD1	Angptl2	Flt1	Pdgfra	Vegfa
Column A	Adjacent region	Adjacent region	Adjacent region	Adjacent region	Adjacent region	Adjacent region	Adjacent region
vs	vs	vs	vs	vs.	vs	vs.	vs
Column B	Red Blood Cell region	Red Blood Cell region	Red Blood Cell region	Red Blood Cell region	Red Blood Cell region	Red Blood Cell region	Red Blood Cell region
Unpaired t test with Welch's correction
P value	0.0094	0.0003	0.0246	0.0001	0.006	0.0007	0.0047
P value summary	**	***	*	***	**	***	**
Are means signif. different? (P < 0.05)	Yes	Yes	Yes	Yes	Yes	Yes	Yes
One- or two-tailed P value?	Two-tailed	Two-tailed	Two-tailed	Two-tailed	Two-tailed	Two-tailed	Two-tailed
Welch-corrected t, df	t=2.929 df=17	t=6.078 df=8	t=2.644 df=10	t=4.965 df=17.38	t=3.568 df=9	t=5.011 df=9.099	t=3.618 df=10
How big is the difference?
Mean ± SEM of column A	1.000 ± 0.2496 N=10	1.000 ± 0.1781 N=9	1.000 ± 0.3290 N=9	1.000 ± 0.2203, n=10	1.000 ± 0.2541 N=10	1.000 ± 0.2305, n=10	1.000 ± 0.2779 N=10
Mean ± SEM of column B	2.178 ± 0.3153 N=10	29.30 ± 4.653 N=9	3.246 ± 0.7831 N=9	2.718 ± 0.2667, n=10	7.221 ± 1.725 N=10	16.66 ± 3.116, n=10	5.274 ± 1.148 N=10
Difference between means	-1.178 ± 0.4021	-28.30 ± 4.657	-2.246 ± 0.8494	-1.718 ± 0.3460	-6.221 ± 1.744	-15.66 ± 3.125	-4.274 ± 1.181
95% confidence interval	-2.026 to -0.3292	-39.04 to -17.57	-4.138 to -0.3532	-2.447 to -0.9891	-10.17 to -2.277	-22.71 to -8.600	-6.906 to -1.642
R squared	0.3353	0.822	0.4114	0.5865	0.5858	0.734	0.5669
Figure 2d	Red Blood Cell count
WT	[Apc] ko	[Arid1a] ko	[Apc-Arid1a] ko
10.53	10.55	8.64	13.6
8.78	9.8	9.29	13.2
8.7	9.7	9.65	12.99
9.29	9.56	9.56	13.1
8.94	9.57	9.44	12.7
8.64	8.66	9.13	13.1
9.63	9.36	9.47	12.9
	9.7	9.17	12.96
	9.81	9.3	12.83
	9.57	9.22	12.8
	9.39	9.35	13.2
	8.72	8.91	13.1
		9.67	13.4
		9.43	12.4
		9.36	14.2
		8.66	14.3
		9.25	14.6
			14.5
PRISM6 One-way ANOVA
Alpha	0.05
Tukey's multiple comparisons test	Mean Diff.	95% CI of diff.	Significant?	Summary	Adjusted P Value		Mean 1	Mean 2	Mean Diff.	SE of diff.	n1	n2	q
WT vs. [Apc] ko	-0.3168	-0.9878 to 0.3542	No	ns	0.5956	A-B	9.216	9.533	-0.3168	0.2525	7	12	1.774
WT vs. [Arid1a] ko	-0.04899	-0.6826 to 0.5846	No	ns	0.9969	A-C	9.216	9.265	-0.04899	0.2384	7	17	0.2906
WT vs. [Apc-Arid1a] ko	-4.111	-4.739 to -3.482	Yes	****	< 0.0001	A-D	9.216	13.33	-4.111	0.2365	7	18	24.59
[Apc] ko vs. [Arid1a] ko	0.2678	-0.2642 to 0.7997	No	ns	0.5437	B-C	9.533	9.265	0.2678	0.2002	12	17	1.892
[Apc] ko vs. [Apc-Arid1a] ko	-3.794	-4.320 to -3.268	Yes	****	< 0.0001	B-D	9.533	13.33	-3.794	0.1978	12	18	27.12
[Arid1a] ko vs. [Apc-Arid1a] ko	-4.062	-4.539 to -3.585	Yes	****	< 0.0001	C-D	9.265	13.33	-4.062	0.1795	17	18	31.99
Figure 2d	Hematocrit
WT	[Apc] ko	[Arid1a] ko	[Apc-Arid1a] ko
49.5	51.2	60	82.14
46.6	49.2	57.69	84.38
46.8	48.1	45.3	73.1
43.6	44.9	48.6	72.6
44.9	47	46.1	72
42.8	43.6	42.8	73
46.2	44.3	46.2	71.2
	46.5	48.1	70.3
	47.5	48.6	72.5
	46.8	44.6	66
	46.2	46.3	69.5
	47.3	46.2	68.5
		47.3	69.7
		45.4	70.1
		46.2	72.8
		46.4	66.8
		45.3	84.6
		44.9	84.2
		47.2	85.2
			86.1
PRISM6 One-way ANOVA
Alpha	0.05
Tukey's multiple comparisons test	Mean Diff.	95% CI of diff.	Significant?	Summary	Adjusted P Value		Mean 1	Mean 2	Mean Diff.	SE of diff.	n1	n2	q	DF
WT vs. [Apc] ko	-1.112	-7.266 to 5.042	No	ns	0.9634	A-B	45.77	46.88	-1.112	2.322	7	12	0.6774	54
WT vs. [Arid1a] ko	-1.765	-7.486 to 3.956	No	ns	0.8458	A-C	45.77	47.54	-1.765	2.158	7	19	1.156	54
WT vs. [Apc-Arid1a] ko	-28.96	-34.65 to -23.28	Yes	****	< 0.0001	A-D	45.77	74.74	-28.96	2.144	7	20	19.11	54
[Apc] ko vs. [Arid1a] ko	-0.653	-5.424 to 4.118	No	ns	0.9835	B-C	46.88	47.54	-0.653	1.8	12	19	0.5131	54
[Apc] ko vs. [Apc-Arid1a] ko	-27.85	-32.58 to -23.13	Yes	****	< 0.0001	B-D	46.88	74.74	-27.85	1.782	12	20	22.1	54
[Arid1a] ko vs. [Apc-Arid1a] ko	-27.2	-31.35 to -23.05	Yes	****	< 0.0001	C-D	47.54	74.74	-27.2	1.564	19	20	24.6	54
Figure 2d	Hemoglobin
WT	[Apc] ko	[Arid1a] ko	[Apc-Arid1a] ko
16.7	16.9	15.9	24.6
16.6	16.8	17.2	23.7
17.2	17.4	16.1	22.3
15.7	16.3	15.4	23.4
16.4	17	16.3	23.9
16.3	15.6	16.3	23.2
15.2	15.8	16.8	23.9
16.4	16	15.3	21.6
	16.5	16.2	23.4
	16.5	16.5	21.8
	16.2	16.6	24.4
	16.8	16.3	24.2
		16.4	24.1
		16.5	24.7
		16	25.3
		15.4	27.9
		16.1	28.5
PRISM6 One-way ANOVA
Alpha	0.05
Tukey's multiple comparisons test	Mean Diff.	95% CI of diff.	Significant?	Summary	Adjusted P Value		Mean 1	Mean 2	Mean Diff.	SE of diff.	n1	n2	q	DF
WT vs. [Apc] ko	-0.1708	-1.526 to 1.184	No	ns	0.9869	A-B	16.31	16.48	-0.1708	0.5099	8	12	0.4738	50
WT vs. [Arid1a] ko	0.1184	-1.155 to 1.391	No	ns	0.9946	A-C	16.31	16.19	0.1184	0.479	8	17	0.3495	50
WT vs. [Apc-Arid1a] ko	-7.858	-9.131 to -6.585	Yes	****	< 0.0001	A-D	16.31	24.17	-7.858	0.479	8	17	23.2	50
[Apc] ko vs. [Arid1a] ko	0.2892	-0.8303 to 1.409	No	ns	0.9017	B-C	16.48	16.19	0.2892	0.4212	12	17	0.971	50
[Apc] ko vs. [Apc-Arid1a] ko	-7.687	-8.807 to -6.568	Yes	****	< 0.0001	B-D	16.48	24.17	-7.687	0.4212	12	17	25.81	50
[Arid1a] ko vs. [Apc-Arid1a] ko	-7.976	-8.995 to -6.958	Yes	****	< 0.0001	C-D	16.19	24.17	-7.976	0.3832	17	17	29.44	50
Figure 2e	EPO expression in the liver (deltaCt)
Raw data	WT	[Apc]ko-focal	[Arid1a]ko-focal	[Apc-Arid1a]ko-focal deltaCt
	Epo >70Ct	Epo >70Ct	Epo >70Ct	23.455
	Epo >70Ct	Epo >70Ct	Epo >70Ct	26.79
	Epo >70Ct	Epo >70Ct	Epo >70Ct	23.335
	Epo >70Ct	Epo >70Ct	Epo >70Ct	24.83
	Epo >70Ct	Epo >70Ct	Epo >70Ct	24.52
	Epo >70Ct	Epo >70Ct	Epo >70Ct	23.945
	Epo >70Ct	Epo >70Ct	Epo >70Ct	24.98
		Epo >70Ct	Epo >70Ct	23.115
		Epo >70Ct	Epo >70Ct	21.945
		Epo >70Ct	Epo >70Ct	28.165
		Epo >70Ct	Epo >70Ct	25.475
		Epo >70Ct	Epo >70Ct	25.18
			Epo >70Ct	24.065
			Epo >70Ct	22.885
			Epo >70Ct	24.465
			Epo >70Ct	25.545
			Epo >70Ct	26.27
			Epo >70Ct	23.825
			Epo >70Ct	24.22
				22.56
				23.035
Figure 2e	EPO mRNA in the kidney
Raw data	Ctrl	Apc KO	Arid1a KO	Double
	50.83	16.03	58.19	226.38
	19	24.38	52.62	0.26
	16.77	80.59	51.18	12.45
	38.92	67.54	10.65	1.35
	235.18	26.22	146.28	0.54
	177	20.64	41.72	1.3
	162.31	52.44	62.58	0.02
		51.72
		178.85
		15.86
PRISM6 One-way ANOVA
Alpha	0.05
Tukey's multiple comparisons test	Mean Diff.	95% CI of diff.	Significant?	Summary	Adjusted P Value		Mean 1	Mean 2	Mean Diff.	SE of diff.	n1	n2	q	DF
Ctrl vs. Apc KO	46.57	-44.54 to 137.7	No	ns	0.5109	A-B	100	53.43	46.57	33.29	7	10	1.978	27
Ctrl vs. Arid1a KO	39.54	-59.28 to 138.4	No	ns	0.6956	A-C	100	60.46	39.54	36.11	7	7	1.549	27
Ctrl vs. Double	65.39	-33.44 to 164.2	No	ns	0.2904	A-D	100	34.61	65.39	36.11	7	7	2.561	27
Apc KO vs. Arid1a KO	-7.033	-98.14 to 84.08	No	ns	0.9966	B-C	53.43	60.46	-7.033	33.29	10	7	0.2987	27
Apc KO vs. Double	18.81	-72.30 to 109.9	No	ns	0.9416	B-D	53.43	34.61	18.81	33.29	10	7	0.7991	27
Arid1a KO vs. Double	25.85	-72.98 to 124.7	No	ns	0.89	C-D	60.46	34.61	25.85	36.11	7	7	1.012	27
Figure 2f	Blood EPO ELISA
WT	[Apc] ko	[Arid1a] ko	[Apc-Arid1a] ko
261.95	359.94	247.01	1002.23
1041.7	381.48	255.35	1306.28
490.25	413.45		1811.86
193.5	378.36		918.83
238.32	261.26		1198.56
139.29			1485.23
			866.71
			1174.23
			1003.97
			1440.06
PRISM6 One-way ANOVA
Alpha	0.05
Tukey's multiple comparisons test	Mean Diff.	95% CI of diff.	Significant?	Summary	Adjusted P Value		Mean 1	Mean 2	Mean Diff.	SE of diff.	n1	n2	q	DF
WT vs. [Apc] ko	35.27	-423.2 to 493.7	No	ns	0.9963	A-B	394.2	358.9	35.27	163.1	6	5	0.3059	19
WT vs. [Arid1a] ko	143	-475.2 to 761.2	No	ns	0.9141	A-C	394.2	251.2	143	219.9	6	2	0.9198	19
WT vs. [Apc-Arid1a] ko	-826.6	-1218 to -435.6	Yes	****	< 0.0001	A-D	394.2	1221	-826.6	139.1	6	10	8.407	19
[Apc] ko vs. [Arid1a] ko	107.7	-525.8 to 741.2	No	ns	0.963	B-C	358.9	251.2	107.7	225.3	5	2	0.6762	19
[Apc] ko vs. [Apc-Arid1a] ko	-861.9	-1277 to -447.2	Yes	****	< 0.0001	B-D	358.9	1221	-861.9	147.5	5	10	8.265	19
[Arid1a] ko vs. [Apc-Arid1a] ko	-969.6	-1556 to -383.1	Yes	***	0.0009	C-D	251.2	1221	-969.6	208.6	2	10	6.574	19
