# Supplementary material for: ARID1A loss in adult hepatocytes activates β-catenin-mediated erythropoietin transcription
Source: eLife journal article supplement (doi:10.7554/elife.53550), 2020-10-21
Supplement: supp [file elife-53550-supp-v1.zip › elife_poa_e53550_Figure_3_source_data_1.xlsx]

## Sheet: Figure 3
Figure 3b	Spleen to body weight
Raw data	WT	[Apc]ko	[Arid1a]ko	[Apc-Arid1a]ko
	0.183824	0.204439	0.240024	0.370582
	0.178117	0.174166	0.287522	0.712666
	0.223881	0.241028	0.327511	0.506045
	0.168027	0.300933	0.20915	0.325203
	0.153492	0.187467	0.186858	0.478065
	0.168955	0.177344	0.261097	0.404095
	0.138026	0.225	0.325145	0.265701
		0.281057	0.171359	1.14058
		0.224719	0.185071	0.835031
		0.203597	0.1638	0.739567
		0.203597	0.197336	0.151515
				0.216049
				0.539084
				0.934816
				0.986923
				0.734137
				0.481378
PRISM6 Ordinary one-way ANOVA
Alpha	0.05
Tukey's multiple comparisons test	Mean Diff.	95% CI of diff.	Significant?	Summary	Adjusted P Value		Mean 1	Mean 2	Mean Diff.	SE of diff.	n1	n2	q	DF
WT vs. [Apc]ko	-0.04683	-0.2810 to 0.1873	No	ns	0.95	A-B	0.1735	0.2203	-0.04683	0.08752	7	11	0.7567	42
WT vs. [Arid1a]ko	-0.05879	-0.2929 to 0.1753	No	ns	0.9072	A-C	0.1735	0.2323	-0.05879	0.08752	7	11	0.9499	42
WT vs. [Apc-Arid1a]ko	-0.4043	-0.6217 to -0.1868	Yes	****	< 0.0001	A-D	0.1735	0.5777	-0.4043	0.0813	7	17	7.032	42
[Apc]ko vs. [Arid1a]ko	-0.01196	-0.2184 to 0.1945	No	ns	0.9987	B-C	0.2203	0.2323	-0.01196	0.07719	11	11	0.2191	42
[Apc]ko vs. [Apc-Arid1a]ko	-0.3574	-0.5448 to -0.1701	Yes	****	< 0.0001	B-D	0.2203	0.5777	-0.3574	0.07005	11	17	7.216	42
[Arid1a]ko vs. [Apc-Arid1a]ko	-0.3455	-0.5328 to -0.1581	Yes	****	< 0.0001	C-D	0.2323	0.5777	-0.3455	0.07005	11	17	6.975	42
Figure 3e	FACS analysis
Raw data	Liver								Bone Marrow								Spleen
	WT				[Apc-Arid1a]ko-focal				WT				[Apc-Arid1a]ko-focal				WT				[Apc-Arid1a]ko-focal
CD71- / Ter119-	14.2	16.7	22.5	2.2	2.4	6.8	0.8	1.8	12.8	19.2	17.9	33.9	7.6	12.3	7.2	18.2	52.1	24.5	16.9	50.8	24.1	18.2	24.4	26.5
CD71+ / Ter119-	0.2	0.5	7.9	2.3	0.2	0.6	0.2	4.8	1	3.2	2.5	7.4	0.8	1.9	2.2	4.7	3	5.8	3.4	8.3	1.4	2.6	6.3	5.3
CD71+ / Ter119+	2.7	3.3	2.7	7.1	1.5	2.7	2.7	5.5	39	43.1	34.6	30.2	35.9	42.1	30.4	35.4	5.3	9.4	7.4	11.6	42.4	23.6	18.7	28.6
CD71- / Ter119+	83	79.5	66.9	88.6	95.9	89.9	96.2	88	47.2	34.4	44.9	28.5	55.7	43.7	60.2	41.7	39.6	60.4	72.3	29.3	32.1	55.6	50.6	39.6
Multiple t-tests		WT			[Apc-Arid1a]ko-focal			t test WT vs KO
		Mean	SEM	N	Mean	SEM	N
CD71- / Ter119-	LIVER	13.9	4.26986	4	2.95	1.32508	4	0.0498408
CD71- / Ter119-	Bone Marrow	20.95	4.5322	4	11.325	2.56755	4	0.11414
CD71- / Ter119-	SPLEEN	36.075	9.01521	4	23.3	1.78185	4	0.21386
CD71+ / Ter119-	LIVER	2.725	1.78623	4	1.45	1.12064	4	0.567559
CD71+ / Ter119-	Bone Marrow	3.525	1.37075	4	2.4	0.82361	4	0.508112
CD71+ / Ter119-	SPLEEN	5.125	1.22568	4	3.9	1.14237	4	0.492255
CD71+ / Ter119+	LIVER	3.95	1.05948	4	3.1	0.848528	4	0.554242
CD71+ / Ter119+	Bone Marrow	36.725	2.7825	4	35.95	2.3967	4	0.839846
CD71+ / Ter119+	SPLEEN	8.425	1.3493	4	28.325	5.10839	4	0.00932827		3.36202
CD71- / Ter119+	LIVER	79.5	4.59909	4	92.5	2.08686	4	0.0421051
CD71- / Ter119+	Bone Marrow	38.75	4.40842	4	50.325	4.5156	4	0.116311
CD71- / Ter119+	SPLEEN	50.4	9.75304	4	44.475	5.3087	4	0.61281
Figure 3f	CFU-E
Raw data		EPO 0								EPO 2U/ml
WT	BM	56	4	12	6	20	2	6	3	332	171	50	139	158	88	166	93
[Apc-Arid1a]ko		60	7	36	7	4	1	16	6	162	142	48	121	186	90	188	76
WT	Liver	0	0	0	0	0	0			3	0	2	1	0	1
[Apc-Arid1a]ko		0	0	0	0	0	0			2	2	1	1	0	0
WT	Spleen	12	2	4	7	2	1	0	2	188	60	154	84	86	50	80	64
[Apc-Arid1a]ko		26	2	12	8	14	0	38	1	2436	847	490	760	3332	722	538	1346
Two-way ANOVA
Bonferroni's multiple comparisons test	Mean Diff.	95% CI of diff.	Significant?	Summary	Adjusted P Value		Mean 1	Mean 2	Mean Diff.	SE of diff.	N1	N2	t	DF
BM
BM WT - BM [Apc-Arid1a]ko GENOTYPE
0U EPO/ml	-3.5	-64.89 to 57.89	No	ns	> 0.9999		13.63	17.13	-3.5	25.92	8	8	0.135	28
2U EPO/ml	23	-38.39 to 84.39	No	ns	0.7649		149.6	126.6	23	25.92	8	8	0.8873	28
0U EPO/ml - 2U EPO/ml TREATMENT
BM WT	-136	-197.4 to -74.61	Yes	****	< 0.0001		13.63	149.6	-136	25.92	8	8	5.247	28
BM [Apc-Arid1a]ko	-109.5	-170.9 to -48.11	Yes	***	0.0005		17.13	126.6	-109.5	25.92	8	8	4.224	28
Liver
Liver WT - Liver [Apc-Arid1a]ko
0U EPO/ml	0	-1.030 to 1.030	No	ns	> 0.9999		0	0	0	0.4249	6	6	0	20
2U EPO/ml	0.1667	-0.8630 to 1.196	No	ns	> 0.9999		1.167	1	0.1667	0.4249	6	6	0.3922	20
0U EPO/ml - 2U EPO/ml
Liver WT	-1.167	-2.196 to -0.1370	Yes	*	0.0249		0	1.167	-1.167	0.4249	6	6	2.746	20
Liver [Apc-Arid1a]ko	-1	-2.030 to 0.02963	No	ns	0.0579		0	1	-1	0.4249	6	6	2.353	20
Spleen
0U EPO/ml - 2U EPO/ml
Spleen WT	-92	-705.2 to 521.2	No	ns	> 0.9999		3.75	95.75	-92	258.9	8	8	0.3554	28
Spleen [Apc-Arid1a]ko	-1296	-1909 to -683.1	Yes	****	< 0.0001		12.63	1309	-1296	258.9	8	8	5.007	28
Spleen WT - Spleen [Apc-Arid1a]ko
0U EPO/ml	-8.875	-622.0 to 604.3	No	ns	> 0.9999		3.75	12.63	-8.875	258.9	8	8	0.03428	28
2U EPO/ml	-1213	-1826 to -600.0	Yes	***	0.0001		95.75	1309	-1213	258.9	8	8	4.686	28		13.671
Figure 3g	mRNA expression in the spleen (qPCR)
Raw data	WT									[Apc]ko			[Arid1a]ko								[Apc-Arid1a]ko
EPO-R	0.508529	0.910293	1.07878	0.598492	0.765462	1.75249	0.795207	1.99226	0.598492	1.54693	1.71642	2.15756	2.07686	3.20295	0.452003	1.45842	4.02616	1.08253	0.724171	1.3008	3.78267	8.13647	8.66022	3.12618	9.64247	4.78793	8.75073	10.5152
Nfe-2	0.404093	0.591627	2.18519	0.427134	0.583482	1.69086	0.595742	2.20039	0.321471	0.816634	1.17102	2.03886	1.49253	2.85356	0.424184	0.854268	2.42462	0.791555	0.449926	0.941322	2.84368	7.22381	7.17392	2.53636	6.88168	2.39124	6.15928	6.88168
Zfpm1	0.530897	0.905323	0.753408	0.77459	0.844696	1.31631	0.665036	2.45633	0.753408	1.09924	1.59273	2.28391	1.66037	2.96186	0.758649	0.940503	3.20762	0.953631	1.43545	1.34864	3.52227	7.62905	7.4462	2.49062	6.02727	3.51008	7.98064	7.02016	4.52057
Gata1	0.500097	0.758006	1.37581	0.611439	0.855762	1.8217	0.702359	2.06377	0.311063	1.55324	1.85354	2.67638	1.9797	3.3994	0.4034	0.993286	3.90489	1.13704	0.483062	1.32895	4.77427	9.74918	10.8926	2.79972	9.35204	4.2289	9.12789	8.87828
Gata2	0.654546	1.13176	1.80696	0.546604	0.643302	0.919274	0.54095	1.78827	0.968328	0.479156	0.422952	0.941849	0.805841	1.24278	1.17982	0.408545	0.623546	0.395999	1.15154	1.00596	0.757106	0.687088	1.57305	0.932107	0.701526	1.20044	0.822774	0.708857
Ordinary one-way ANOVA
Alpha	0.05
Tukey's multiple comparisons test	Mean Diff.	95% CI of diff.	Significant?	Summary	Adjusted P Value		Mean 1	Mean 2	Mean Diff.	SE of diff.	n1	n2	q	DF
EPO-R
WT vs. [Apc]ko	-0.807	-3.942 to 2.328	No	ns	0.8921	A-B	1	1.807	-0.807	1.136	9	3	1.004	24
WT vs. [Arid1a]ko	-0.7905	-3.075 to 1.494	No	ns	0.7761	A-C	1	1.79	-0.7905	0.8283	9	8	1.35	24
WT vs. [Apc-Arid1a]ko	-6.175	-8.460 to -3.890	Yes	****	< 0.0001	A-D	1	7.175	-6.175	0.8283	9	8	10.54	24
[Apc]ko vs. [Arid1a]ko	0.01648	-3.167 to 3.200	No	ns	> 0.9999	B-C	1.807	1.79	0.01648	1.154	3	8	0.0202	24
[Apc]ko vs. [Apc-Arid1a]ko	-5.368	-8.552 to -2.185	Yes	***	0.0005	B-D	1.807	7.175	-5.368	1.154	3	8	6.579	24
[Arid1a]ko vs. [Apc-Arid1a]ko	-5.385	-7.736 to -3.034	Yes	****	< 0.0001	C-D	1.79	7.175	-5.385	0.8523	8	8	8.935	24
Nfe2
WT vs. [Apc]ko	-0.3422	-2.905 to 2.221	No	ns	0.9825	A-B	1	1.342	-0.3422	0.9292	9	3	0.5208	24
WT vs. [Arid1a]ko	-0.279	-2.147 to 1.589	No	ns	0.9759	A-C	1	1.279	-0.279	0.6773	9	8	0.5826	24
WT vs. [Apc-Arid1a]ko	-4.261	-6.130 to -2.393	Yes	****	< 0.0001	A-D	1	5.261	-4.261	0.6773	9	8	8.899	24
[Apc]ko vs. [Arid1a]ko	0.06317	-2.540 to 2.666	No	ns	0.9999	B-C	1.342	1.279	0.06317	0.9436	3	8	0.09468	24
[Apc]ko vs. [Apc-Arid1a]ko	-3.919	-6.522 to -1.316	Yes	**	0.0019	B-D	1.342	5.261	-3.919	0.9436	3	8	5.874	24
[Arid1a]ko vs. [Apc-Arid1a]ko	-3.982	-5.905 to -2.060	Yes	****	< 0.0001	C-D	1.279	5.261	-3.982	0.6969	8	8	8.082	24
Zfpm1
WT vs. [Apc]ko	-0.6586	-3.103 to 1.786	No	ns	0.8796	A-B	1	1.659	-0.6586	0.8888	9	3	1.048	25
WT vs. [Arid1a]ko	-0.6583	-2.440 to 1.124	No	ns	0.7416	A-C	1	1.658	-0.6583	0.6478	9	8	1.437	25
WT vs. [Apc-Arid1a]ko	-4.572	-6.301 to -2.843	Yes	****	< 0.0001	A-D	1	5.572	-4.572	0.6285	9	9	10.29	25
[Apc]ko vs. [Arid1a]ko	0.0002852	-2.482 to 2.483	No	ns	> 0.9999	B-C	1.659	1.658	0.0002852	0.9026	3	8	0.0004468	25
[Apc]ko vs. [Apc-Arid1a]ko	-3.913	-6.358 to -1.468	Yes	***	0.0009	B-D	1.659	5.572	-3.913	0.8888	3	9	6.226	25
[Arid1a]ko vs. [Apc-Arid1a]ko	-3.914	-5.695 to -2.132	Yes	****	< 0.0001	C-D	1.658	5.572	-3.914	0.6478	8	9	8.543	25
Gata1
WT vs. [Apc]ko	-1.028	-4.393 to 2.338	No	ns	0.8338	A-B	1	2.028	-1.028	1.22	9	3	1.191	24
WT vs. [Arid1a]ko	-0.7037	-3.157 to 1.749	No	ns	0.8576	A-C	1	1.704	-0.7037	0.8892	9	8	1.119	24
WT vs. [Apc-Arid1a]ko	-6.475	-8.928 to -4.022	Yes	****	< 0.0001	A-D	1	7.475	-6.475	0.8892	9	8	10.3	24
[Apc]ko vs. [Arid1a]ko	0.324	-3.094 to 3.742	No	ns	0.9936	B-C	2.028	1.704	0.324	1.239	3	8	0.3698	24
[Apc]ko vs. [Apc-Arid1a]ko	-5.448	-8.865 to -2.030	Yes	**	0.001	B-D	2.028	7.475	-5.448	1.239	3	8	6.218	24
[Arid1a]ko vs. [Apc-Arid1a]ko	-5.772	-8.296 to -3.247	Yes	****	< 0.0001	C-D	1.704	7.475	-5.772	0.915	8	8	8.92	24
Gata2
WT vs. [Apc]ko	0.3853	-0.3311 to 1.102	No	ns	0.4624	A-B	1	0.6147	0.3853	0.2597	9	3	2.098	24
WT vs. [Arid1a]ko	0.1482	-0.3740 to 0.6705	No	ns	0.8614	A-C	1	0.8518	0.1482	0.1893	9	8	1.107	24
WT vs. [Apc-Arid1a]ko	0.07713	-0.4451 to 0.5994	No	ns	0.9766	A-D	1	0.9229	0.07713	0.1893	9	8	0.5762	24
[Apc]ko vs. [Arid1a]ko	-0.2371	-0.9647 to 0.4905	No	ns	0.8054	B-C	0.6147	0.8518	-0.2371	0.2638	3	8	1.271	24
[Apc]ko vs. [Apc-Arid1a]ko	-0.3082	-1.036 to 0.4194	No	ns	0.6518	B-D	0.6147	0.9229	-0.3082	0.2638	3	8	1.653	24
[Arid1a]ko vs. [Apc-Arid1a]ko	-0.07112	-0.6085 to 0.4662	No	ns	0.983	C-D	0.8518	0.9229	-0.07112	0.1948	8	8	0.5163	24
