# Supplementary material for: ARID1A loss in adult hepatocytes activates β-catenin-mediated erythropoietin transcription
Source: eLife journal article supplement (doi:10.7554/elife.53550), 2020-10-21
Supplement: supp [file elife-53550-supp-v1.zip › elife_poa_e53550_Figure_4_source_data_1.xlsx]

## Sheet: Figure 4
Figure 4a		Hematocrit before and after treatment with anti-Epo
Raw data	Before treatment	After treatment
	73.1	46
	69.8	42.3
	72	48
	71.1	43.1
Before treatment	vs	After treatment
Unpaired t test with Welch's correction
P value	< 0.0001
P value summary	***
Are means signif. different? (P < 0.05)	Yes
One- or two-tailed P value?	Two-tailed
Welch-corrected t, df	t=17.88 df=4
How big is the difference?
Mean ± SEM of column A	71.50 ± 0.6988 N=4
Mean ± SEM of column B	44.85 ± 1.317 N=4
Difference between means	26.65 ± 1.491
95% confidence interval	22.51 to 30.79
R squared	0.9876
Figure 4c		FACS quantification of double ko spleens before and after tratment with anti-EPO
Raw data	Without treatment				With treatment
CD71- / Ter119-	24.1	18.2	24.4	26.5	23.1	14.4	2.5	15.6
CD71+ / Ter119-	1.4	2.6	6.3	5.3	0.6	11.5	20.5	9.4
CD71+ / Ter119+	42.4	23.6	18.7	28.6	0.4	1.2	2.7	2.7
CD71- / Ter119+	32.1	55.6	50.6	39.6	75.9	69.6	54.4	72.3
No treatment	vs	With treatment
Unpaired t test with Welch's correction	CD71- Ter119-		CD71+ Ter119-		CD71+ Ter119+		CD71- Ter119+
P value	0.1115		0.2175		0.014		0.0211
P value summary	ns		ns		*		*
Are means signif. different? (P < 0.05)	No		No		Yes		Yes
One- or two-tailed P value?	Two-tailed		Two-tailed		Two-tailed		Two-tailed
Welch-corrected t, df	t=2.036 df=4		t=1.556 df=3		t=5.170 df=3		t=3.316 df=5
How big is the difference?
Mean ± SEM of column A	23.30 ± 1.782 N=4		3.900 ± 1.142 N=4		28.33 ± 5.108 N=4		44.48 ± 5.309 N=4
Mean ± SEM of column B	13.90 ± 4.260 N=4		10.50 ± 4.085 N=4		1.750 ± 0.5723 N=4		68.05 ± 4.729 N=4
Difference between means	9.400 ± 4.617		-6.600 ± 4.241		26.58 ± 5.140		-23.58 ± 7.110
95% confidence interval	-3.418 to 22.22		-20.10 to 6.896		10.22 to 42.93		-41.85 to -5.296
R squared	0.5089		0.4466		0.8991		0.6874
Figure 4d		qPCR expression of erythropoietic factors in double ko spleens before and after anti-EPO treatment
Raw data	Untreated WT									Untreated[Apc-Arid1a]ko-focal									Treated [Apc-Arid1a]ko-focal
EpoR	0.508529	0.910293	1.07878	0.598492	0.765462	1.75249	0.795207	1.99226	0.598492	3.78267	8.13647	8.66022	3.12618	9.64247	4.78793	8.75073	10.5152		0.558412	1.26086	1.03484	1.43336
Nfe-2	0.404093	0.591627	2.18519	0.427134	0.583482	1.69086	0.595742	2.20039	0.321471	2.84368	7.22381	7.17392	2.53636	6.88168	2.39124	6.15928	6.88168		0.925151	1.08129	1.17102	1.44169
Zfpm1	0.530897	0.905323	0.753408	0.77459	0.844696	1.31631	0.665036	2.45633	0.753408	3.52227	7.62905	7.4462	2.49062	6.02727	3.51008	7.98064	7.02016		1.03635	1.49641	1.46561	1.70114
Gata1	0.500097	0.758006	1.37581	0.611439	0.855762	1.8217	0.702359	2.06377	0.311063	4.77427	9.74918	10.8926	2.79972	9.35204	4.2289	9.12789	8.87828		1.02831	0.84985	1.18122	1.68796
Ordinary one-way ANOVA
Alpha	0.05
Tukey's multiple comparisons test	Mean Diff.	95% CI of diff.	Significant?	Summary	Adjusted P Value		Mean 1	Mean 2	Mean Diff.	SE of diff.	n1	n2	q	DF
	EpoR
Untreated WT vs. Untreated[Apc-Arid1a]ko-focal	-6.175	-8.423 to -3.928	Yes	****	< 0.0001	A-B	1	7.175	-6.175	0.8806	9	8	9.917	18
Untreated WT vs. Treated [Apc-Arid1a]ko-focal	-0.07187	-2.851 to 2.707	No	ns	0.9976	A-C	1	1.072	-0.07187	1.089	9	4	0.09333	18
Untreated[Apc-Arid1a]ko-focal vs. Treated [Apc-Arid1a]ko-focal	6.103	3.271 to 8.936	Yes	****	< 0.0001	B-C	7.175	1.072	6.103	1.11	8	4	7.778	18
	Nfe-2
Untreated WT vs. Untreated[Apc-Arid1a]ko-focal	-4.261	-6.114 to -2.409	Yes	****	< 0.0001	A-B	1	5.261	-4.261	0.726	9	8	8.301	18
Untreated WT vs. Treated [Apc-Arid1a]ko-focal	-0.1548	-2.446 to 2.137	No	ns	0.9838	A-C	1	1.155	-0.1548	0.8979	9	4	0.2438	18
Untreated[Apc-Arid1a]ko-focal vs. Treated [Apc-Arid1a]ko-focal	4.107	1.771 to 6.442	Yes	***	0.0008	B-C	5.261	1.155	4.107	0.915	8	4	6.347	18
	Zfpm1
Untreated WT vs. Untreated[Apc-Arid1a]ko-focal	-4.703	-6.473 to -2.934	Yes	****	< 0.0001	A-B	1	5.703	-4.703	0.6934	9	8	9.593	18
Untreated WT vs. Treated [Apc-Arid1a]ko-focal	-0.4249	-2.613 to 1.764	No	ns	0.8744	A-C	1	1.425	-0.4249	0.8575	9	4	0.7007	18
Untreated[Apc-Arid1a]ko-focal vs. Treated [Apc-Arid1a]ko-focal	4.278	2.048 to 6.509	Yes	***	0.0003	B-C	5.703	1.425	4.278	0.8738	8	4	6.924	18
	Gata1
Untreated WT vs. Untreated[Apc-Arid1a]ko-focal	-6.475	-8.888 to -4.062	Yes	****	< 0.0001	A-B	1	7.475	-6.475	0.9455	9	8	9.686	18
Untreated WT vs. Treated [Apc-Arid1a]ko-focal	-0.1868	-3.171 to 2.797	No	ns	0.986	A-C	1	1.187	-0.1868	1.169	9	4	0.226	18
Untreated[Apc-Arid1a]ko-focal vs. Treated [Apc-Arid1a]ko-focal	6.289	3.248 to 9.330	Yes	***	0.0001	B-C	7.475	1.187	6.289	1.192	8	4	7.464	18
Figure 4g		FACS quantification of double ko LIVERS before and after tratment with anti-EPO
Table Analyzed	CD71-/Ter119-		CD71+/Ter119-		CD71+/Ter119+		CD71-/Ter119+
Column A	Without treatment		Without treatment		Without treatment		Without treatment
vs	vs		vs		vs		vs
Column B	With treatment		With treatment		With treatment		With treatment
Unpaired t test with Welch's correction
P value	0.0035		0.1251		0.9233		0.0051
P value summary	**		ns		ns		**
Are means signif. different? (P < 0.05)	Yes		No		No		Yes
One- or two-tailed P value?	Two-tailed		Two-tailed		Two-tailed		Two-tailed
Welch-corrected t, df	t=6.161 df=4		t=2.112 df=3		t=0.1013 df=5		t=5.570 df=4
How big is the difference?
Mean ± SEM of column A	2.950 ± 1.325 N=4		1.450 ± 1.121 N=4		3.100 ± 0.8485 N=4		92.50 ± 2.087 N=4
Mean ± SEM of column B	12.00 ± 0.6338 N=4		10.48 ± 4.124 N=4		2.950 ± 1.214 N=4		70.30 ± 3.395 N=4
Difference between means	-9.050 ± 1.469		-9.025 ± 4.273		0.1500 ± 1.481		22.20 ± 3.985
95% confidence interval	-13.13 to -4.972		-22.62 to 4.572		-3.658 to 3.958		11.14 to 33.26
R squared	0.9047		0.5979		0.002047		0.8858
Figure 4h		qPCR expression of angiogenic factors in double ko LIVERS before and after anti-EPO treatment
Multiple t-tests	Untreated [Apc-Arid1a]ko-focal			Treated [Apc-Arid1a]ko-focal			t-test treated vs untreated
	Mean	SEM	N	Mean	SEM	N
Angptl2	1	0.0412968	10	1.41314	0.402753	4	0.120906
Ephb4	1	0.116854	10	1.429	0.436497	4	0.205139
Flt1	1	0.14796	10	1.44132	0.548601	4	0.295531
Pdgfra	0.834312	0.17285	10	0.990069	0.423442	4	0.685802
Tgfb	1	0.0779145	10	1.20078	0.155746	4	0.223133
Vcam1	1	0.141654	10	1.19938	0.213601	4	0.461339
Vegfa	1	0.0940111	10	1.07194	0.137219	4	0.684194
