# Supplementary material for: ARID1A loss in adult hepatocytes activates β-catenin-mediated erythropoietin transcription
Source: eLife journal article supplement (doi:10.7554/elife.53550), 2020-10-21
Supplement: supp [file elife-53550-supp-v1.zip › elife_poa_e53550_Figure_5_source_data_1.xlsx]

## Sheet: Figure 5
Figure 5b		Efficiency of Apc and Arid1a inactivation
Raw data	WT	[Apc]ko-TOTAL	[Arid1a]ko-TOTAL	[Apc-Arid1a]ko-TOTAL			WT	[Apc]ko-TOTAL	[Arid1a]ko-TOTAL	[Apc-Arid1a]ko-TOTAL
Apc invalidation	-3.1235	83.6497	1.22279	70.9487		Arid1a invalidation	1.56978	2.62234	89.456	82.6469
	0.156244	87.4215	3.11067	83.1674			3.20621	-7.16355	92.41	88.657
	2.05407	91.0041	-3.65641	91.5501			-2.25688	0.124764	82.567	90.3568
	-2.15306	76.1478	-0.005761	90.3269			-3.35978	-1.56878	90.149	75.2545
	1.53369	92.4679	2.73462	78.4571			0.519865	3.54355	92.378	93.5645
	5.33611	86.2444	1.36816	95.4189			0.355045	3.63145	84.015	91.2154
	-3.25686	79.8467	2.3856	92.4662			0.0688435	-0.966472	95.566	86.5455
	-0.546574		-7.03058	74.221			-0.124646		74.1479	91.5457
				93.1119						92.5456
				88.0973						90.4345
Ordinary one-way ANOVA
Alpha	0.05
Tukey's multiple comparisons test	Mean Diff.	95% CI of diff.	Significant?	Summary	Adjusted P Value		Mean 1	Mean 2	Mean Diff.	SE of diff.	n1	n2	q	DF
Apc gene invalidation
WT vs. [Apc]ko-TOTAL	-85.25	-93.62 to -76.89	Yes	****	< 0.0001	A-B	1.384e-05	85.25	-85.25	3.069	8	7	39.29	29
WT vs. [Arid1a]ko-TOTAL	-0.01612	-8.094 to 8.061	No	ns	> 0.9999	A-C	1.384e-05	0.01614	-0.01612	2.965	8	8	0.007691	29
WT vs. [Apc-Arid1a]ko-TOTAL	-85.78	-93.44 to -78.11	Yes	****	< 0.0001	A-D	1.384e-05	85.78	-85.78	2.813	8	10	43.13	29
[Apc]ko-TOTAL vs. [Arid1a]ko-TOTAL	85.24	76.88 to 93.60	Yes	****	< 0.0001	B-C	85.25	0.01614	85.24	3.069	7	8	39.28	29
[Apc]ko-TOTAL vs. [Apc-Arid1a]ko-TOTAL	-0.522	-8.483 to 7.439	No	ns	0.9979	B-D	85.25	85.78	-0.522	2.922	7	10	0.2526	29
[Arid1a]ko-TOTAL vs. [Apc-Arid1a]ko-TOTAL	-85.76	-93.42 to -78.10	Yes	****	< 0.0001	C-D	0.01614	85.78	-85.76	2.813	8	10	43.12	29
Arid1a gene invalidation
WT vs. [Apc]ko-TOTAL	-0.0346	-7.130 to 7.061	No	ns	> 0.9999	A-B	-0.002696	0.0319	-0.0346	2.604	8	7	0.01879	29
WT vs. [Arid1a]ko-TOTAL	-87.59	-94.44 to -80.73	Yes	****	< 0.0001	A-C	-0.002696	87.59	-87.59	2.516	8	8	49.23	29
WT vs. [Apc-Arid1a]ko-TOTAL	-88.28	-94.78 to -81.78	Yes	****	< 0.0001	A-D	-0.002696	88.28	-88.28	2.387	8	10	52.31	29
[Apc]ko-TOTAL vs. [Arid1a]ko-TOTAL	-87.55	-94.65 to -80.46	Yes	****	< 0.0001	B-C	0.0319	87.59	-87.55	2.604	7	8	47.55	29
[Apc]ko-TOTAL vs. [Apc-Arid1a]ko-TOTAL	-88.24	-95.00 to -81.49	Yes	****	< 0.0001	B-D	0.0319	88.28	-88.24	2.48	7	10	50.33	29
[Arid1a]ko-TOTAL vs. [Apc-Arid1a]ko-TOTAL	-0.6905	-7.194 to 5.812	No	ns	0.9914	C-D	87.59	88.28	-0.6905	2.387	8	10	0.4091	29
Figure 5c		EPO mRNA in liver (Delta Ct Epo-18s)
	NPC										Hepatocyte
WT											Epo >70Ct	Epo >70Ct	Epo >70Ct	Epo >70Ct	Epo >70Ct	Epo >70Ct	Epo >70Ct	Epo >70Ct
[Apc]ko-TOTAL											Epo >70Ct	Epo >70Ct	Epo >70Ct	Epo >70Ct	Epo >70Ct	Epo >70Ct	Epo >70Ct
[Arid1a]ko-TOTAL											Epo >70Ct	Epo >70Ct	Epo >70Ct	Epo >70Ct	Epo >70Ct	Epo >70Ct	Epo >70Ct	Epo >70Ct
[Apc-Arid1a]ko-TOTAL	Epo >70Ct	Epo >70Ct	Epo >70Ct	Epo >70Ct	Epo >70Ct	Epo >70Ct	Epo >70Ct	Epo >70Ct	Epo >70Ct	Epo >70Ct	28.85	28.785	28.225	28.66	27.695	28.225	28.645	29.15	29.265	27.51
Figure 5d		EPO mRNA in kidney
Raw data	WT	[Apc]ko	[Arid1a]ko	[Apc-Arid1a]ko
	0.521389	1.7117	3.06404	0.576516
	0.704872	1.35232	0.600998	0.285276
	0.714712		2.65817	1.07582
	0.216199		2.55874	0.419119
	0.659952
	1.28827
	1.34764
	1.49012
	2.05685
Ordinary one-way ANOVA
Alpha	0.05
Tukey's multiple comparisons test	Mean Diff.	95% CI of diff.	Significant?	Summary	Adjusted P Value		Mean 1	Mean 2	Mean Diff.	SE of diff.	n1	n2	q	DF
WT vs. [Apc]ko	-0.532	-2.044 to 0.9796	No	ns	0.7437	A-B	1	1.532	-0.532	0.5245	9	2	1.435	15
WT vs. [Arid1a]ko	-1.22	-2.382 to -0.05850	Yes	*	0.038	A-C	1	2.22	-1.22	0.4032	9	4	4.281	15
WT vs. [Apc-Arid1a]ko	0.4108	-0.7512 to 1.573	No	ns	0.7412	A-D	1	0.5892	0.4108	0.4032	9	4	1.441	15
[Apc]ko vs. [Arid1a]ko	-0.6885	-2.363 to 0.9861	No	ns	0.6451	B-C	1.532	2.22	-0.6885	0.581	2	4	1.676	15
[Apc]ko vs. [Apc-Arid1a]ko	0.9428	-0.7318 to 2.617	No	ns	0.3962	B-D	1.532	0.5892	0.9428	0.581	2	4	2.295	15
[Arid1a]ko vs. [Apc-Arid1a]ko	1.631	0.2640 to 2.999	Yes	*	0.0172	C-D	2.22	0.5892	1.631	0.4744	4	4	4.863	15
Figure 5e		qPCR expression of Axin2, Arid1a and Epo in si-treated mouse hepatocytes with/without Wnt/Spondin stimulation (Stim)
Raw data	siControl - Stim								siControl + Stim								siARID1A - Stim								siARID1A + Stim
Axin2	1.7786	1.7602	0.72736	0.75301	0.826875	0.613758	0.660093	0.880101	86.2673	79.1075	98.7522	89.6196	48.5279	41.2334	49.035	37.2906	1.20643	0.541766	0.98674	1.20225	0.782272	1.0358	1.14135	0.574645	62.0664	35.7716	27.1098	56.1316	48.5279	83.0404	53.1037	59.3321
Arid1a	0.72829	0.753973	0.78872	0.79973	0.872112	1.4718	1.13885	1.44652	1.27243	1.57198	0.756591	0.909146	0.851209	0.893528	0.813709	0.713302	0.255711	0.190463	0.238587	0.208423	0.215773	0.204133	0.235302	0.194465	0.0949021	0.180815	0.212066	0.32705	0.324791	0.126972	0.137032	0.209146
Epo	1.34336	1.07612	1.01104	1.31571	0.84724	1.21912	0.0260214	1.16138	1.92631	1.37635	1.26212	1.36211	0.956504	0.414902	1.12962	0.611677	1.54847	1.28863	0.889362	1.18579	1.28418	1.8224	0.155054	1.44979	3.64481	3.65746	0.62453	3.38896	2.75269	3.50847	0.400769	2.09339
Two-way ANOVA
Alpha	0.05
Bonferroni's multiple comparisons test	Mean Diff.	95% CI of diff.	Significant?	Summary	Adjusted P Value		Mean 1	Mean 2	Mean Diff.	SE of diff.	N1	N2	t	DF
Axin2
no wnt - wnt-spo
si-Scramble	-65.23	-82.95 to -47.51	Yes	****	< 0.0001		1	66.23	-65.23	7.48	8	8	8.72	28
si-Arid1a	-52.2	-69.92 to -34.48	Yes	****	< 0.0001		0.9339	53.14	-52.2	7.48	8	8	6.978	28
si-Scramble - si-Arid1a
no wnt	0.06609	-17.65 to 17.78	No	ns	> 0.9999		1	0.9339	0.06609	7.48	8	8	0.008836	28
wnt-spo	13.09	-4.623 to 30.81	No	ns	0.182		66.23	53.14	13.09	7.48	8	8	1.75	28
Arid1a
no wnt - wnt-spo
si-Scramble	0.02726	-0.2324 to 0.2869	No	ns	> 0.9999		1	0.9727	0.02726	0.1096	8	8	0.2487	28
si-Arid1a	0.01626	-0.2434 to 0.2759	No	ns	> 0.9999		0.2179	0.2016	0.01626	0.1096	8	8	0.1483	28
si-Scramble - si-Arid1a
no wnt	0.7821	0.5225 to 1.042	Yes	****	< 0.0001		1	0.2179	0.7821	0.1096	8	8	7.134	28
wnt-spo	0.7711	0.5115 to 1.031	Yes	****	< 0.0001		0.9727	0.2016	0.7711	0.1096	8	8	7.033	28
Epo
no wnt - wnt-spo
si-Scramble	-0.1299	-1.057 to 0.7968	No	ns	0.9339		1	1.13	-0.1299	0.3922	8	8	0.3313	28
si-Arid1a	-1.306	-2.233 to -0.3792	Yes	**	0.0049		1.203	2.509	-1.306	0.3922	8	8	3.329	28
si-Scramble - si-Arid1a
no wnt	-0.203	-1.132 to 0.7260	No	ns	> 0.9999		1	1.203	-0.203	0.3922	8	8	0.5174	28
wnt-spo	-1.379	-2.308 to -0.4500	Yes	**	0.003		1.13	2.509	-1.379	0.3922	8	8	3.516	28
Figure 5f		qPCR expression of APC, ARID1A and EPO in si-treated human hepatocytes
Raw data	APC					ARID1A					EPO
	siSC	siAPC	siARID1A	siAPC+ARID1A		siSC	siAPC	siARID1A	siAPC+ARID1A		siSC	siAPC	siARID1A	siAPC+ARID1A
	1.21484	0.197615	1.37627	0.262568		1.14081	1.3756	0.30994	0.517654		0.918431	1.16251	0.549901	2.03813
	1.2841	0.210335	1.19811	0.26995		1.23976	1.18104	0.316452	0.528531		0.777677	1.34466	0.644943	1.70201
	0.763533	0.216249	1.52707	0.262568		0.790074	1.38517	0.503499	0.489731		1.00503	1.15448	0.856927
	0.737525	0.204584	1.49564	0.225432		0.829354	1.47433	0.453779	0.482988		1.29886	1.6214	1.19519	1.82417
Ordinary one-way ANOVA
Alpha	0.05
Tukey's multiple comparisons test	Mean Diff.	95% CI of diff.	Significant?	Summary	Adjusted P Value		Mean 1	Mean 2	Mean Diff.	SE of diff.	n1	n2	q	DF
APC
siSC vs. siAPC	0.7928	0.4501 to 1.135	Yes	****	< 0.0001	A-B	1	0.2072	0.7928	0.1154	4	4	9.714	12
siSC vs. siARID1A	-0.3993	-0.7419 to -0.05662	Yes	*	0.0213	A-C	1	1.399	-0.3993	0.1154	4	4	4.892	12
siSC vs. siAPC+ARID1A	0.7449	0.4022 to 1.088	Yes	***	0.0002	A-D	1	0.2551	0.7449	0.1154	4	4	9.127	12
siAPC vs. siARID1A	-1.192	-1.535 to -0.8494	Yes	****	< 0.0001	B-C	0.2072	1.399	-1.192	0.1154	4	4	14.61	12
siAPC vs. siAPC+ARID1A	-0.04793	-0.3906 to 0.2947	No	ns	0.9748	B-D	0.2072	0.2551	-0.04793	0.1154	4	4	0.5873	12
siARID1A vs. siAPC+ARID1A	1.144	0.8015 to 1.487	Yes	****	< 0.0001	C-D	1.399	0.2551	1.144	0.1154	4	4	14.02	12
ARID1A
siSC vs. siAPC	-0.354	-0.6424 to -0.06568	Yes	*	0.0153	A-B	1	1.354	-0.354	0.09712	4	4	5.155	12
siSC vs. siARID1A	0.6041	0.3157 to 0.8924	Yes	***	0.0002	A-C	1	0.3959	0.6041	0.09712	4	4	8.796	12
siSC vs. siAPC+ARID1A	0.4953	0.2069 to 0.7836	Yes	**	0.0013	A-D	1	0.5047	0.4953	0.09712	4	4	7.212	12
siAPC vs. siARID1A	0.9581	0.6698 to 1.246	Yes	****	< 0.0001	B-C	1.354	0.3959	0.9581	0.09712	4	4	13.95	12
siAPC vs. siAPC+ARID1A	0.8493	0.5610 to 1.138	Yes	****	< 0.0001	B-D	1.354	0.5047	0.8493	0.09712	4	4	12.37	12
siARID1A vs. siAPC+ARID1A	-0.1088	-0.3972 to 0.1795	No	ns	0.6846	C-D	0.3959	0.5047	-0.1088	0.09712	4	4	1.584	12
EPO
siSC vs. siAPC	-0.3208	-0.8146 to 0.1731	No	ns	0.2618	A-B	1	1.321	-0.3208	0.1641	4	4	2.764	11
siSC vs. siARID1A	0.1883	-0.3056 to 0.6821	No	ns	0.6698	A-C	1	0.8117	0.1883	0.1641	4	4	1.622	11
siSC vs. siAPC+ARID1A	-0.8548	-1.388 to -0.3213	Yes	**	0.0026	A-D	1	1.855	-0.8548	0.1772	4	3	6.82	11
siAPC vs. siARID1A	0.509	0.01516 to 1.003	Yes	*	0.0429	B-C	1.321	0.8117	0.509	0.1641	4	4	4.387	11
siAPC vs. siAPC+ARID1A	-0.534	-1.067 to -0.0005764	Yes	*	0.0497	B-D	1.321	1.855	-0.534	0.1772	4	3	4.261	11
siARID1A vs. siAPC+ARID1A	-1.043	-1.576 to -0.5096	Yes	***	0.0005	C-D	0.8117	1.855	-1.043	0.1772	4	3	8.322	11
