# Supplementary material for: ARID1A loss in adult hepatocytes activates β-catenin-mediated erythropoietin transcription
Source: eLife journal article supplement (doi:10.7554/elife.53550), 2020-10-21
Supplement: supp [file elife-53550-supp-v1.zip › elife_poa_e53550_Figure_5_source_data_2.xlsx]

## Sheet: Figure5_S1
Figure S8a	Liver to body weight after panlobular knock-outs
Raw data	WT	[Apc]ko	[Arid1a]ko	{Apc-Arid1a]ko
	4.88	6.43	5.91	8.18
	4.28	10.04	5.35	9
	4.66	6.76	5.09	7.71
	4.68	6.06	5.01	9.94
	4.68	7.36	3.94	9.26
	4.48	8.77	5.04	7.65
	6.25	8.2	5.69	7.58
	5.86			8.26
	5.55			7.02
	6.17			11.73
	4.98			8.59
	5.43			8.22
	5.2			9.25
	4.68			9.88
	5.54
	5.87
	6.09
	5.45
	6.13
	5.52
	5.69
	5.27
	5.43
	5.67
	5.48
	5.16
	4.94
	4.03
	6.56
	5.9
Ordinary one-way ANOVA
Alpha	0.05
Tukey's multiple comparisons test	Mean Diff.	95% CI of diff.	Significant?	Summary	Adjusted P Value
WT vs. [Apc]ko	-2.31	-3.332 to -1.287	Yes	****	< 0.0001
WT vs. [Arid1a]ko	0.2032	-0.8192 to 1.226	No	ns	0.9522
WT vs. {Apc-Arid1a]ko	-3.383	-4.172 to -2.595	Yes	****	< 0.0001
[Apc]ko vs. [Arid1a]ko	2.513	1.211 to 3.815	Yes	****	< 0.0001
[Apc]ko vs. {Apc-Arid1a]ko	-1.074	-2.201 to 0.05398	No	ns	0.0674
[Arid1a]ko vs. {Apc-Arid1a]ko	-3.586	-4.714 to -2.459	Yes	****	< 0.0001
