# Supplementary material for: ARID1A loss in adult hepatocytes activates β-catenin-mediated erythropoietin transcription
Source: eLife journal article supplement (doi:10.7554/elife.53550), 2020-10-21
Supplement: supp [file elife-53550-supp-v1.zip › elife_poa_e53550_Figure_5_source_data_3.xlsx]

## Sheet: Figure5_S2
Figure 5_S2a	Efficiency of Apc and/or Arid1a inactivation in NPC
raw data	WT						[Apc-Arid1a)ko-TOTAL
Apc	-6.56	7.56	-4.73	3.96	0.92	-1.87	-16.2	5.94	4.96	1.6	-2.93	7.56
Arid1a	-2.46	1.03	2.4	-10.57	3.74	5.07	-23.11	9.87	3.74	1.38	1.38	6.05
	WT			[Apc-Arid1a)ko-TOTAL
	Mean	SEM	N	Mean	SEM	N	t-test
Apc	-0.12	2.17944	6	0.155	3.60777	6	0.949266
Arid1a	-0.131667	2.33941	6	-0.115	4.78124	6	0.997563
Figure 5_S2b	qPCR mRNA expression in Wnt/Spondin-stimulated mouse transgenic hepatocytes
Table Analyzed	Axin2						Arid1a						Epo
Raw data	WT - Stim	WT + Stim	Arid1a KO - Stim	Arid1a KO + Stim			WT - Stim	WT + Stim	Arid1a KO - Stim	Arid1a KO + Stim			WT - Stim	WT + Stim	Arid1a KO - Stim	Arid1a KO + Stim
	1.07239	64.0368	1.11406	64.7061			0.781035	0.928812	0.0582523	0.137115			1.37289	0.859887	1.41639	3.08917
	1.09872	79.9391	1.07985	97.7368			0.928812	0.941778	0.0855824	0.141459			1.14252	1.11128	0.865868	6.76091
	1.29759	73.3045	0.491693	68.633			0.604351	0.974989	0.0962853	0.0846972			0.950803	0.908916	1.17058	2.02401
	1.14538	44.349	0.646548	33.3781			1.01288	0.837092	0.106097	0.0815291			0.748575	1.16653	0.703303	1.99615
	1.05763	44.1956	0.818373	38.3414			1.03058	0.935272	0.101775	0.0787519			1.17464	0.862872	1.45621	1.92815
	0.348887	42.8383	1.00405	44.9681			0.9886	0.919205	0.0936523	0.079575			0.753782	1.96185	1.89503	4.6823
	0.692953	62.0702	1.53244	59.1305			1.17565	1.07435	0.0702411	0.120196			1.19104	0.766957	1.04407	3.65968
	1.23613	65.8371	1.41994	37.6827			0.916025	0.992032	0.0747625	0.0898373			1.15446	1.20348	1.64401	1.90821
	1.05032	62.9367	1.06868	58.3164			1.56207	1.11223	0.0709752	0.0876841			0.511292	1.27652	0.730633	3.23153
															0.681705
Ordinary one-way ANOVA															0.723076
Alpha	0.05						0.05						0.05		1.33999
Tukey's multiple comparisons test	Mean Diff.	95% CI of diff.	Significant?	Summary	Adjusted P Value		Mean Diff.	95% CI of diff.	Significant?	Summary	Adjusted P Value		Mean Diff.	95% CI of diff.	Significant?	Summary	Adjusted P Value
WT - Stim vs. WT + Stim	-58.95	-73.68 to -44.21	Yes	****	< 0.0001		0.03158	-0.1390 to 0.2022	No	ns	0.9587		-0.1243	-1.193 to 0.9443	No	ns	0.9891
WT - Stim vs. Arid1a KO - Stim	-0.0815	-13.87 to 13.70	No	ns	> 0.9999		0.9095	0.7499 to 1.069	Yes	****	< 0.0001		-0.1392	-1.139 to 0.8603	No	ns	0.9816
WT - Stim vs. Arid1a KO + Stim	-54.88	-69.61 to -40.14	Yes	****	< 0.0001		0.8999	0.7293 to 1.071	Yes	****	< 0.0001		-2.253	-3.322 to -1.185	Yes	****	< 0.0001
WT + Stim vs. Arid1a KO - Stim	58.86	45.08 to 72.65	Yes	****	< 0.0001		0.8779	0.7183 to 1.038	Yes	****	< 0.0001		-0.01498	-1.014 to 0.9845	No	ns	> 0.9999
WT + Stim vs. Arid1a KO + Stim	4.068	-10.67 to 18.80	No	ns	0.8783		0.8683	0.6977 to 1.039	Yes	****	< 0.0001		-2.129	-3.198 to -1.061	Yes	****	< 0.0001
Arid1a KO - Stim vs. Arid1a KO + Stim	-54.8	-68.58 to -41.01	Yes	****	< 0.0001		-0.009588	-0.1692 to 0.1500	No	ns	0.9985		-2.114	-3.114 to -1.115	Yes	****	< 0.0001
Figure 5_S2c	qPCR mRNA expression in si-treated mouse transgenic hepatocytes
Table Analyzed	Epo						Axin2						Arid1a
Raw data	WT - siScr	Apc KO - siScr	WT- siArid1a	Apc KO - siArid1a			WT - siScr	Apc KO - siScr	WT- siArid1a	Apc KO - siArid1a			WT - siScr	Apc KO - siScr	WT- siArid1a	Apc KO - siArid1a
	0.112285	0.0437443	0.00670865	2.09978			1.22412	139.754	1.09183	76.7312			0.88387	1.421	0.259159	0.115575
	4.34766	0.00968682	0.0157909	2.89836			0.874628	82.524	0.532828	73.6055			0.963867	0.717926	0.170981	0.128239
	0.00172431	1.04989	0.0245223	13.4566			0.930928	145.184	1.05463	152.931			1.00132	1.39176	0.230351	0.222504
	0.979582	0.0110887	0.357308	2.52317			0.836097	87.8361	0.836097	92.5231			0.953898	0.853762	0.190374	0.209774
	1.47926e-05	0.803984	0.00357024	1.39497			0.868586	85.1386	0.868586	96.787			1.15421	0.967214	0.272043	0.170981
	0.558736	0.000443198	0.0426958	2.42039			1.01518	95.7859	1.01518	109.648			1.11489	0.934267	0.232759	0.187103
		0.00291001	0.171376	7.01401			1.24551	121.662	1.24551	111.952			0.905575	1.19906	0.217171	0.181357
		0.027589	0.00143497	3.19372			0.683845	88.141	0.683845	94.1403			1.02236	0.818984	0.195726	0.157334
				4.61151			1.3211	106.281	1.3211	101.599			0.88387	0.987537	0.175788	0.142784
Ordinary one-way ANOVA
Alpha	0.05						0.05						0.05
Tukey's multiple comparisons test	Mean Diff.	95% CI of diff.	Significant?	Summary	Adjusted P Value		Mean Diff.	95% CI of diff.	Significant?	Summary	Adjusted P Value		Mean Diff.	95% CI of diff.	Significant?	Summary	Adjusted P Value
WT - siScr vs. Apc KO - siScr	0.7563	-2.486 to 3.999	No	ns	0.9186		-104.8	-126.3 to -83.36	Yes	****	< 0.0001		-0.04529	-0.2196 to 0.1290	No	ns	0.8947
WT - siScr vs. WT- siArid1a	0.9221	-2.320 to 4.164	No	ns	0.8636		0.03893	-21.41 to 21.49	No	ns	> 0.9999		0.7711	0.5968 to 0.9454	Yes	****	< 0.0001
WT - siScr vs. Apc KO - siArid1a	-3.401	-6.566 to -0.2373	Yes	*	0.0316		-100.1	-121.6 to -78.65	Yes	****	< 0.0001		0.8187	0.6444 to 0.9930	Yes	****	< 0.0001
Apc KO - siScr vs. WT- siArid1a	0.1657	-2.836 to 3.167	No	ns	0.9987		104.9	83.40 to 126.3	Yes	****	< 0.0001		0.8164	0.6420 to 0.9907	Yes	****	< 0.0001
Apc KO - siScr vs. Apc KO - siArid1a	-4.158	-7.075 to -1.241	Yes	**	0.003		4.71	-16.74 to 26.16	No	ns	0.9329		0.864	0.6897 to 1.038	Yes	****	< 0.0001
WT- siArid1a vs. Apc KO - siArid1a	-4.323	-7.241 to -1.406	Yes	**	0.002		-100.1	-121.6 to -78.69	Yes	****	< 0.0001		0.04763	-0.1267 to 0.2219	No	ns	0.88
Figure 5_S2d	qPCR mRNA expression in si-treated mouse Hepa1-6 cells
Table Analyzed	Axin2						Arid1a						Epo
Column B	HEPA 1.6 siβcatenin	HEPA 1.6 siScr	HEPA 1.6 siβcatenin + siArid1a	HEPA 1.6 siArid1a			HEPA 1.6 siβcatenin	HEPA 1.6 siScr	HEPA 1.6 siβcatenin + siArid1a	HEPA 1.6 siArid1a			HEPA 1.6 siβcatenin	HEPA 1.6 siScr	HEPA 1.6 siβcatenin + siArid1a	HEPA 1.6 siArid1a
vs.	0.865299	5.41241	1.37199	3.82715			0.99471	1.02979	0.348045	0.253903			1.25911	1.15461	0.974278	2.14712
Column A	1.04701	4.77755	1.09906	3.89405			1.04779	1.0121	0.309358	0.304043			0.718174	1.42149	1.46145	1.43635
	1.08769	4.21716	1.07272	3.77446			0.957502	0.767026	0.296756	0.274019			1.02272	1.06615	0.764403	3.75134
Unpaired t test with Welch's correction		3.97587		5.20996				0.33619		0.174023				0.636135		2.01029
P value		4.61481		5.12045				0.320267		0.153079				1.21622		0.94109
P value summary		4.5042		4.69548				0.314765		0.132342				1.37307		1.79304
Significantly different? (P < 0.05)		7.11701		6.13163				0.88414		0.186513				1.17479		1.63853
One- or two-tailed P value?		6.28221		6.41421				0.674714		0.213506				0.740928		2.37414
Welch-corrected t, df		5.72102		5.64225				0.705808		0.173421				1.22893		4.73185
		9.89206		7.70755				1.11523		0.275925				0.723169		1.46653
How big is the difference?		9.45627		7.3425				0.318055		0.263769				0.805192		1.40679
Mean ± SEM of column A		10.1702		5.08508				1.20359		0.161807				1.06615		1.46145
Mean ± SEM of column B		4.59884		5.60328				0.44669		0.18016				0.614466		1.54478
Difference between means		5.39369		5.66184				0.567364		0.178915				1.00515		1.55015
95% confidence interval		5.54532		4.24649				0.523894		0.233638				1.11528		2.01727
R squared		3.93475		3.81391				0.573294		0.223345				0.538644		2.10294
		4.30577		3.88058				0.647229		0.197832				1.7022		1.92173
		4.11608						0.555688						1.02272
Ordinary one-way ANOVA
Alpha	0.05						0.05						0.05
Tukey's multiple comparisons test	Mean Diff.	95% CI of diff.	Significant?	Summary	Adjusted P Value		Mean Diff.	95% CI of diff.	Significant?	Summary	Adjusted P Value		Mean Diff.	95% CI of diff.	Significant?	Summary	Adjusted P Value
HEPA 1.6 siβcatenin vs. HEPA 1.6 siScr	-4.78	-7.479 to -2.080	Yes	***	0.0002		0.3336	0.005028 to 0.6621	Yes	*	0.0455		-0.03363	-1.126 to 1.059	No	ns	0.9998
HEPA 1.6 siβcatenin vs. HEPA 1.6 siβcatenin + siArid1a	-0.1813	-3.716 to 3.353	No	ns	0.999		0.6819	0.2518 to 1.112	Yes	***	0.0007		-0.06671	-1.497 to 1.364	No	ns	0.9993
HEPA 1.6 siβcatenin vs. HEPA 1.6 siArid1a	-4.179	-6.890 to -1.468	Yes	**	0.001		0.7894	0.4595 to 1.119	Yes	****	< 0.0001		-1.017	-2.114 to 0.07972	No	ns	0.0774
HEPA 1.6 siScr vs. HEPA 1.6 siβcatenin + siArid1a	4.598	1.899 to 7.298	Yes	***	0.0003		0.3484	0.01985 to 0.6769	Yes	*	0.0341		-0.03308	-1.126 to 1.059	No	ns	0.9998
HEPA 1.6 siScr vs. HEPA 1.6 siArid1a	0.6003	-0.8638 to 2.064	No	ns	0.6901		0.4558	0.2777 to 0.6340	Yes	****	< 0.0001		-0.9837	-1.576 to -0.3912	Yes	***	0.0004
HEPA 1.6 siβcatenin + siArid1a vs. HEPA 1.6 siArid1a	-3.998	-6.709 to -1.287	Yes	**	0.0018		0.1075	-0.2225 to 0.4374	No	ns	0.8172		-0.9507	-2.048 to 0.1464	No	ns	0.1094
Figure 5_S2e			Actin											Activated beta-catenin
														beta-catenin
				Arid1a
