# Supplementary material for: ARID1A loss in adult hepatocytes activates β-catenin-mediated erythropoietin transcription
Source: eLife journal article supplement (doi:10.7554/elife.53550), 2020-10-21
Supplement: supp [file elife-53550-supp-v1.zip › elife_poa_e53550_Figure_7_source_data_1.xlsx]

## Sheet: Figure 7
Figure 7c		EpoE-Luc relative activity in si-treated and Wnt stimulated mouse hepatocytes
Raw data	WT	+ siCtrl	+ siCtrl + Stim	+ siArid1a - Stim	+ siArid1a + Stim
	1.46369	1.34139	6.52018	1.0685	6.05157
	1.29008	1.33648	4.73745	1.15156	6.39581
	1.23392	1.21211	5.24836	1.55087	5.78011
	0.750921	0.743093	3.9893	0.601858	4.94042
	0.642032	0.684323	4.80786	0.614857	5.87565
	0.619358	0.428084	5.14376	0.8004	5.71735
		1.40486
		0.867555
		1.18982
Ordinary one-way ANOVA to compare WT to siCtrl to siArid1a
Alpha	0.05
Tukey's multiple comparisons test	Mean Diff.	95% CI of diff.	Significant?	Summary	Adjusted P Value		Mean 1	Mean 2	Mean Diff.	SE of diff.	n1	n2	q	DF
WT vs. siCtrl	-0.02308	-0.5080 to 0.4619	No	ns	0.9919	A-B	1	1.023	-0.02308	0.19	6	9	0.1718	18
WT vs. siArid1a	0.03532	-0.4959 to 0.5665	No	ns	0.9843	A-C	1	0.9647	0.03532	0.2081	6	6	0.24	18
siCtrl vs. siArid1a	0.0584	-0.4265 to 0.5433	No	ns	0.9494	B-C	1.023	0.9647	0.0584	0.19	9	6	0.4347	18
Two-way ANOVA with multiple comparisons
Alpha	0.05
Bonferroni's multiple comparisons test	Mean Diff.	95% CI of diff.	Significant?	Summary	Adjusted P Value		Mean 1	Mean 2	Mean Diff.	SE of diff.	N1	N2	t	DF
No Wnt - Wnt-Spo
Si-Scramble	-4.051	-4.713 to -3.390	Yes	****	< 0.0001		1.023	5.074	-4.051	0.276	9	6	14.68	23
Si-Arid1a	-4.829	-5.554 to -4.104	Yes	****	< 0.0001		0.9647	5.793	-4.829	0.3024	6	6	15.97	23
Si-Scramble - Si-Arid1a
No Wnt	0.0584	-0.6034 to 0.7202	No	ns	> 0.9999		1.023	0.9647	0.0584	0.276	9	6	0.2116	23
Wnt-Spo	-0.719	-1.444 to 0.006002	No	ns	0.0522		5.074	5.793	-0.719	0.3024	6	6	2.378	23
Figure 7d		EpoE-Luc relative activity in mouse transgenic hepatocytes
Raw data	WT	[Apc] ko-TOTAL	[Arid1a] ko-TOTAL	[Apc- Arid1a] ko-TOTAL
	1.42713	6.23509	1.45781	8.73771
	1.51299	6.39442	1.37005	8.4977
	0.986186	5.31215	1.13077	6.37879
	0.809302	9.72666	1.88856	6.28819
	0.840592	8.98689	1.29212	4.33289
	0.423794	8.26108	1.93106	4.6814
Ordinary one-way ANOVA
Alpha	0.05
Tukey's multiple comparisons test	Mean Diff.	95% CI of diff.	Significant?	Summary	Adjusted P Value		Mean 1	Mean 2	Mean Diff.	SE of diff.	n1	n2	q	DF
WT vs. [Apc] ko-TOTAL	-6.486	-8.586 to -4.386	Yes	****	< 0.0001	A-B	1	7.486	-6.486	0.7504	6	6	12.22	20
WT vs. [Arid1a] ko-TOTAL	-0.5117	-2.612 to 1.589	No	ns	0.9028	A-C	1	1.512	-0.5117	0.7504	6	6	0.9644	20
WT vs. [Apc- Arid1a] ko-TOTAL	-5.486	-7.587 to -3.386	Yes	****	< 0.0001	A-D	1	6.486	-5.486	0.7504	6	6	10.34	20
[Apc] ko-TOTAL vs. [Arid1a] ko-TOTAL	5.974	3.874 to 8.075	Yes	****	< 0.0001	B-C	7.486	1.512	5.974	0.7504	6	6	11.26	20
[Apc] ko-TOTAL vs. [Apc- Arid1a] ko-TOTAL	0.9999	-1.101 to 3.100	No	ns	0.554	B-D	7.486	6.486	0.9999	0.7504	6	6	1.884	20
[Arid1a] ko-TOTAL vs. [Apc- Arid1a] ko-TOTAL	-4.974	-7.075 to -2.874	Yes	****	< 0.0001	C-D	1.512	6.486	-4.974	0.7504	6	6	9.374	20
Figure 7e		EpoE-Luc relative activity in mouse transgenic hepatocytes treated with DFO and/or si-HIF1a/2a
Raw data	WT - DFO	WT + DFO	WT+DFO+siHIF
	1.03458	34.0799	1.97052
	0.845593	20.2004	4.17893
	0.726763	29.6708	3.6772
	1.39307	27.2581	2.64472
Ordinary one-way ANOVA
Alpha	0.05
Tukey's multiple comparisons test	Mean Diff.	95% CI of diff.	Significant?	Summary	Adjusted P Value		Mean 1	Mean 2	Mean Diff.	SE of diff.	n1	n2	q	DF
WT - DFO vs. WT + DFO	-26.8	-33.52 to -20.08	Yes	****	< 0.0001	A-B	1	27.8	-26.8	2.406	4	4	15.75	9
WT - DFO vs. WT+DFO+siHIF	-2.118	-8.836 to 4.600	No	ns	0.6654	A-C	1	3.118	-2.118	2.406	4	4	1.245	9
WT + DFO vs. WT+DFO+siHIF	24.68	17.97 to 31.40	Yes	****	< 0.0001	B-C	27.8	3.118	24.68	2.406	4	4	14.51	9
Raw data	WT						[Apc]ko-TOTAL						[Arid1a]ko-TOTAL						[Apc-Arid1a]ko-TOTAL
siControl	1.34514	1.42607	0.929527	0.762805	0.792298	0.399446	5.87687	6.02704	5.00695	9.16784	8.47057	7.78646	1.37405	1.29133	1.0658	1.78006	1.21789	1.82012	8.23571	8.00948	6.01231	5.92692	4.08395	4.41244
siHIF1a	0.870996	1.73754	0.798942	0.699521	1.0873	0.676206	8.59976	6.54922	6.87832	5.61723	6.61372	5.57964	1.31641	1.69541	1.22089	1.1386	1.20219	0.826849	9.15823	4.88376	3.33556	3.96147	3.68202	2.67927
siHIF2a	0.927456	0.597105	1.6986	0.962325	0.979106	0.841714	4.78724	5.3503	3.8759	6.20759	11.2608	9.99718	0.645843	0.647742	1.01866	1.96952	1.19011	1.46793	6.3407	7.43737	5.27339	7.91773	6.07112	3.32115
siHIF1a + siHIF2a	1.67603	0.962042	1.58632	0.651561	0.734465	0.657443	5.94962	5.745	10.1409	4.54081	4.01022	4.78044	1.44177	0.652344	0.69535	1.2183	0.825755	1.73205	5.48088	4.71675	3.72841	5.40963	6.02832	8.13009
Two-way ANOVA
Alpha	0.05
Bonferroni's multiple comparisons test	Mean Diff.	95% CI of diff.	Significant?	Summary	Adjusted P Value		Mean 1	Mean 2	Mean Diff.	SE of diff.	N1	N2	t	DF
SiRNA effect
WT
siControl vs. siHIF1a	-0.03587	-2.051 to 1.979	No	ns	> 0.9999		0.9425	0.9784	-0.03587	0.824	6	6	0.04353	80
siControl vs. siHIF2a	-0.0585	-2.074 to 1.957	No	ns	> 0.9999		0.9425	1.001	-0.0585	0.824	6	6	0.071	80
siControl vs. siHIF1a + siHIF2a	-0.1021	-2.117 to 1.913	No	ns	> 0.9999		0.9425	1.045	-0.1021	0.824	6	6	0.1239	80
[Apc]ko-TOTAL
siControl vs. siHIF1a	0.4163	-1.599 to 2.431	No	ns	> 0.9999		7.056	6.64	0.4163	0.824	6	6	0.5052	80
siControl vs. siHIF2a	0.1428	-1.872 to 2.158	No	ns	> 0.9999		7.056	6.913	0.1428	0.824	6	6	0.1733	80
siControl vs. siHIF1a + siHIF2a	1.195	-0.8203 to 3.210	No	ns	0.453		7.056	5.861	1.195	0.824	6	6	1.45	80
[Arid1a]ko-TOTAL
siControl vs. siHIF1a	0.1915	-1.824 to 2.207	No	ns	> 0.9999		1.425	1.233	0.1915	0.824	6	6	0.2324	80
siControl vs. siHIF2a	0.2682	-1.747 to 2.283	No	ns	> 0.9999		1.425	1.157	0.2682	0.824	6	6	0.3255	80
siControl vs. siHIF1a + siHIF2a	0.3306	-1.684 to 2.346	No	ns	> 0.9999		1.425	1.094	0.3306	0.824	6	6	0.4012	80
[Apc-Arid1a]ko-TOTAL
siControl vs. siHIF1a	1.497	-0.5183 to 3.512	No	ns	0.2192		6.113	4.617	1.497	0.824	6	6	1.816	80
siControl vs. siHIF2a	0.05322	-1.962 to 2.068	No	ns	> 0.9999		6.113	6.06	0.05322	0.824	6	6	0.06459	80
siControl vs. siHIF1a + siHIF2a	0.5311	-1.484 to 2.546	No	ns	> 0.9999		6.113	5.582	0.5311	0.824	6	6	0.6445	80
Genotype effect
siControl
WT vs. [Apc]ko-TOTAL	-6.113	-8.129 to -4.098	Yes	****	< 0.0001		0.9425	7.056	-6.113	0.824	6	6	7.419	80
WT vs. [Arid1a]ko-TOTAL	-0.4823	-2.497 to 1.533	No	ns	> 0.9999		0.9425	1.425	-0.4823	0.824	6	6	0.5853	80
WT vs. [Apc-Arid1a]ko-TOTAL	-5.171	-7.186 to -3.156	Yes	****	< 0.0001		0.9425	6.113	-5.171	0.824	6	6	6.275	80
siHIF1a
WT vs. [Apc]ko-TOTAL	-5.661	-7.676 to -3.646	Yes	****	< 0.0001		0.9784	6.64	-5.661	0.824	6	6	6.87	80
WT vs. [Arid1a]ko-TOTAL	-0.255	-2.270 to 1.760	No	ns	> 0.9999		0.9784	1.233	-0.255	0.824	6	6	0.3094	80
WT vs. [Apc-Arid1a]ko-TOTAL	-3.638	-5.653 to -1.623	Yes	****	< 0.0001		0.9784	4.617	-3.638	0.824	6	6	4.415	80
siHIF2a
WT vs. [Apc]ko-TOTAL	-5.912	-7.927 to -3.897	Yes	****	< 0.0001		1.001	6.913	-5.912	0.824	6	6	7.174	80
WT vs. [Arid1a]ko-TOTAL	-0.1556	-2.171 to 1.860	No	ns	> 0.9999		1.001	1.157	-0.1556	0.824	6	6	0.1888	80
WT vs. [Apc-Arid1a]ko-TOTAL	-5.059	-7.074 to -3.044	Yes	****	< 0.0001		1.001	6.06	-5.059	0.824	6	6	6.139	80
siHIF1a + siHIF2a
WT vs. [Apc]ko-TOTAL	-4.817	-6.832 to -2.801	Yes	****	< 0.0001		1.045	5.861	-4.817	0.824	6	6	5.845	80
WT vs. [Arid1a]ko-TOTAL	-0.04962	-2.065 to 1.965	No	ns	> 0.9999		1.045	1.094	-0.04962	0.824	6	6	0.06021	80
WT vs. [Apc-Arid1a]ko-TOTAL	-4.538	-6.553 to -2.523	Yes	****	< 0.0001		1.045	5.582	-4.538	0.824	6	6	5.507	80
