# Supplementary material for: ARID1A loss in adult hepatocytes activates β-catenin-mediated erythropoietin transcription
Source: eLife journal article supplement (doi:10.7554/elife.53550), 2020-10-21
Supplement: supp [file elife-53550-supp-v1.zip › elife_poa_e53550_Figure_7_source_data_2.xlsx]

## Sheet: Figure7_S1
Figure 7 S1c	Quantification of Hif2a protein normalized to laminA/C
Raw values	WT	[Apc]ko	[Arid1a]ko	[Apc-Arid1a]ko
	1.27732	1.22212	1.69801	0.975449
	1.21476	0.857572	0.559251	1.13162
Ordinary one-way ANOVA
Alpha	0.05
Tukey's multiple comparisons test	Mean Diff.	95% CI of diff.	Significant?	Summary	Adjusted P Value
WT vs. [Apc]ko	0.2062	-1.532 to 1.944	No	ns	0.9589
WT vs. [Arid1a]ko	0.1174	-1.620 to 1.855	No	ns	0.9916
WT vs. [Apc-Arid1a]ko	0.1925	-1.545 to 1.930	No	ns	0.966
[Apc]ko vs. [Arid1a]ko	-0.08878	-1.827 to 1.649	No	ns	0.9963
[Apc]ko vs. [Apc-Arid1a]ko	-0.01369	-1.752 to 1.724	No	ns	> 0.9999
[Arid1a]ko vs. [Apc-Arid1a]ko	0.07509	-1.663 to 1.813	No	ns	0.9977
Figure 7_S1d		HIF1alpha target gene expression by qPCR
Table Analyzed	Angptl4						Eno2						Car9						Kctd11						Pgk1
Raw values	WT	Apc ko	Arid1a ko	Double ko			WT	Apc ko	Arid1a ko	Double ko			WT	Apc ko	Arid1a ko	Double ko			WT	Apc ko	Arid1a ko	Double ko			WT	Apc ko	Arid1a ko	Double ko
	1.59999	3.51387	1.84428	3.30136			0.390622	1.26037	2.15673	2.53827			0.648823	1.36216	1.04311	2.54188			0.708179	1.21183	0.884041	1.79899			0.851714	1.66837	0.713726	1.01638
	1.05195	1.25098	1.56164	1.86356			1.00267	1.23443	1.46799	3.29173			1.27094	1.71226	1.12967	2.64982			0.563382	1.8115	0.493864	2.38202			0.985168	1.49842	1.24267	1.40293
	0.684471	1.14319	1.9904	0.623327			1.34616	0.961825	2.01929	2.63691			0.901811	1.71226	1.86723	1.84152			0.725569	1.61573	1.07713	1.21603			1.01991	1.29096	0.77563	1.15945
	2.08936	4.76694	1.79385	0.679743			0.995744	1.67463	2.06887	1.45785			1.465	1.81617	0.904942	1.38597			1.97545	1.51801	0.880982	0.769602			1.35984	1.41759	0.968243	0.663625
	0.593805	0.548309	0.797227	0.86039			0.811603	0.74942	1.56791	1.15576			0.557057	0.68108	1.01811	0.779649			0.614372	0.585274	0.509511	0.740815			0.721185	0.57772	0.71869	0.860616
	0.537025	0.881518	1.65068	0.797227			1.20484	1.12027	1.36969	2.65525			1.18583	1.42494	0.889396	1.64821			0.940947	0.738252	0.351643	1.15443			1.2171	0.964893	0.472518	0.701464
	0.36935	1.65068	3.71423	1.82531			1.68628	0.630184	2.03333	2.63958			1.06873	0.936855	0.963193	1.47477			1.51801	0.599647	0.499025	1.4517			1.16752	0.703899	0.645479	0.885833
	1.07405	0.612619		8.09416			0.562079	1.61759		3.72314			0.901811	0.821252		2.51364			0.954082	0.642686		1.84834			0.67757	0.404284		1.1655
Ordinary one-way ANOVA
Alpha	0.05						Alpha	0.05					Alpha	0.05					Alpha	0.05					Alpha	0.05
Tukey's multiple comparisons test	Mean Diff.	95% CI of diff.	Significant?	Summary	Adjusted P Value		Mean Diff.	95% CI of diff.	Significant?	Summary	Adjusted P Value		Mean Diff.	95% CI of diff.	Significant?	Summary	Adjusted P Value		Mean Diff.	95% CI of diff.	Significant?	Summary	Adjusted P Value		Mean Diff.	95% CI of diff.	Significant?	Summary	Adjusted P Value
WT vs. Apc ko	-0.796	-2.971 to 1.379	No	ns	0.7497		-0.1561	-0.8981 to 0.5859	No	ns	0.9385		-0.3084	-0.9446 to 0.3278	No	ns	0.5547		-0.06577	-0.5038 to 0.3723	No	ns	0.9761		-0.06577	-0.5038 to 0.3723	No	ns	0.9761
WT vs. Arid1a ko	-0.9075	-3.158 to 1.343	No	ns	0.6906		-0.812	-1.580 to -0.04392	Yes	*	0.0353		-0.1165	-0.7750 to 0.5420	No	ns	0.9619		0.209	-0.2444 to 0.6625	No	ns	0.5945		0.209	-0.2444 to 0.6625	No	ns	0.5945
WT vs. Double ko	-1.256	-3.430 to 0.9189	No	ns	0.4063		-1.512	-2.254 to -0.7703	Yes	****	< 0.0001		-0.8544	-1.491 to -0.2182	Yes	**	0.0054		0.01803	-0.4201 to 0.4561	No	ns	0.9995		0.01803	-0.4201 to 0.4561	No	ns	0.9995
Apc ko vs. Arid1a ko	-0.1115	-2.362 to 2.139	No	ns	0.9991		-0.6559	-1.424 to 0.1122	No	ns	0.1146		0.1918	-0.4667 to 0.8504	No	ns	0.855		0.2748	-0.1787 to 0.7282	No	ns	0.3646		0.2748	-0.1787 to 0.7282	No	ns	0.3646
Apc ko vs. Double ko	-0.4596	-2.634 to 1.715	No	ns	0.9377		-1.356	-2.098 to -0.6142	Yes	***	0.0002		-0.5461	-1.182 to 0.09013	No	ns	0.1119		0.08379	-0.3543 to 0.5219	No	ns	0.9527		0.08379	-0.3543 to 0.5219	No	ns	0.9527
Arid1a ko vs. Double ko	-0.3482	-2.599 to 1.903	No	ns	0.974		-0.7003	-1.468 to 0.06771	No	ns	0.0834		-0.7379	-1.396 to -0.07939	Yes	*	0.0237		-0.191	-0.6444 to 0.2625	No	ns	0.661		-0.191	-0.6444 to 0.2625	No	ns	0.661
Figure 7_S1e		HIF2alpha target gene expression by qPCR
Table Analyzed	Inhbb						Plac8						Rab42						Ptprb
Raw values	WT	Apc ko	Arid1a ko	Double ko			WT	Apc ko	Arid1a ko	Double ko			WT	Apc ko	Arid1a ko	Double ko			WT	Apc ko	Arid1a ko	Double ko
	0.230339	0.967163	0.263675	1.30299			0.563029	2.89043	1.45527	1.92023			0.762062	2.72826	0.831034	2.67211			1.14721	1.65076	0.764789	0.971398
	0.181348	0.816107	0.21566	2.60599			1.28457	1.64294	1.16982	2.47303			1.06288	2.97519	1.18344	2.73773			1.13142	1.51376	1.42715	1.1592
	0.444986	0.896161	1.27618	0.743204			0.892721	2.20577	2.71562	1.94704			1.01958	1.5454	1.26399	2.49317			1.32238	1.23811	1.20425	0.499354
	4.21879	1.31661	0.350341	1.13826			2.94095	1.82929	1.70679	1.45023			1.24658	2.17796	1.14709	1.90261			1.5033	1.63936	1.54022	0.390429
	0.799312	0.412318	0.119645	0.766751			0.420822	0.976899	0.54385	0.895821			0.786206	1.07027	1.04101	1.70288			0.634254	0.563752	0.581614	0.43171
	0.573089	0.605765	0.321264	0.934218			0.60344	0.631249	0.626889	1.25813			1.1313	1.25961	0.759425	3.66288			0.770108	0.55024	0.489077	0.489077
	0.475274	0.53843	0.362695	0.711228			0.45574	0.895821	0.642283	1.72547			1.06288	2.55439	0.906249	2.15982			0.797266	0.520559	0.677425	0.548793
	1.07686	0.629305		2.63868			0.838732	0.779857		2.62144			0.928504	1.5454		4.11718			0.694061	0.427244		1.01194
Ordinary one-way ANOVA
Alpha	0.05						Alpha	0.05					Alpha	0.05					Alpha	0.05
Tukey's multiple comparisons test	Mean Diff.	95% CI of diff.	Significant?	Summary	Adjusted P Value		Mean Diff.	95% CI of diff.	Significant?	Summary	Adjusted P Value		Mean Diff.	95% CI of diff.	Significant?	Summary	Adjusted P Value		Mean Diff.	95% CI of diff.	Significant?	Summary	Adjusted P Value
WT vs. Apc ko	0.2273	-0.9054 to 1.360	No	ns	0.946		-0.4815	-1.515 to 0.5517	No	ns	0.5859		-0.9821	-1.770 to -0.1940	Yes	*	0.0104		-0.01297	-0.5761 to 0.5501	No	ns	> 0.9999
WT vs. Arid1a ko	0.5844	-0.5880 to 1.757	No	ns	0.5319		-0.2658	-1.335 to 0.8037	No	ns	0.9038		-0.01889	-0.8346 to 0.7968	No	ns	> 0.9999		0.04507	-0.5378 to 0.6279	No	ns	0.9966
WT vs. Double ko	-0.3552	-1.488 to 0.7775	No	ns	0.8261		-0.7864	-1.820 to 0.2468	No	ns	0.1842		-1.681	-2.469 to -0.8930	Yes	****	< 0.0001		0.3123	-0.2508 to 0.8754	No	ns	0.4414
Apc ko vs. Arid1a ko	0.3571	-0.8153 to 1.529	No	ns	0.8381		0.2157	-0.8538 to 1.285	No	ns	0.9452		0.9632	0.1475 to 1.779	Yes	*	0.0161		0.05804	-0.5248 to 0.6409	No	ns	0.9928
Apc ko vs. Double ko	-0.5824	-1.715 to 0.5502	No	ns	0.5059		-0.3049	-1.338 to 0.7283	No	ns	0.8503		-0.699	-1.487 to 0.08907	No	ns	0.0958		0.3252	-0.2379 to 0.8883	No	ns	0.4061
Arid1a ko vs. Double ko	-0.9395	-2.112 to 0.2328	No	ns	0.1508		-0.5206	-1.590 to 0.5489	No	ns	0.5512		-1.662	-2.478 to -0.8464	Yes	****	< 0.0001		0.2672	-0.3157 to 0.8501	No	ns	0.5987
