# Supplementary material for: ARID1A loss in adult hepatocytes activates β-catenin-mediated erythropoietin transcription
Source: eLife journal article supplement (doi:10.7554/elife.53550), 2020-10-21
Supplement: supp [file elife-53550-supp-v1.zip › elife_poa_e53550_Figure_7_source_data_3.xlsx]

## Sheet: Figure7_S2
Figure 7_S2a		HIF1a expression after si- and/or DFO treatment
Raw data	-DFO						+DFO
	siControl	siHIF1a	siHIF2a	siHIF1a + siHIF2a			siControl	siHIF1a	siHIF2a	siHIF1a + siHIF2a
	1.39046	0.077512	0.763428	0.205266			0.906788	0.29399	1.0672	0.29399
	0.633126	0.0794155	1.26187	0.151834			0.965158	0.242127	1.21743	0.297062
	0.976413	0.0872055	1.21047	0.115869			1.12805	0.233879	1.05617	0.338878
Ordinary one way ANOVA
Alpha	0.05						0.05
Tukey's multiple comparisons test	Mean Diff.	95% CI of diff.	Significant?	Summary	Adjusted P Value		Mean Diff.	95% CI of diff.	Significant?	Summary	Adjusted P Value
siControl vs. siHIF1a	0.9186	0.3040 to 1.533	Yes	**	0.006		0.7433	0.5453 to 0.9414	Yes	****	< 0.0001
siControl vs. siHIF2a	-0.07859	-0.6932 to 0.5360	No	ns	0.9753		-0.1136	-0.3117 to 0.08448	No	ns	0.3248
siControl vs. siHIF1a + siHIF2a	0.8423	0.2277 to 1.457	Yes	**	0.01		0.69	0.4919 to 0.8881	Yes	****	< 0.0001
siHIF1a vs. siHIF2a	-0.9972	-1.612 to -0.3826	Yes	**	0.0037		-0.8569	-1.055 to -0.6589	Yes	****	< 0.0001
siHIF1a vs. siHIF1a + siHIF2a	-0.07628	-0.6909 to 0.5383	No	ns	0.9773		-0.05331	-0.2514 to 0.1448	No	ns	0.824
siHIF2a vs. siHIF1a + siHIF2a	0.9209	0.3063 to 1.536	Yes	**	0.0059		0.8036	0.6055 to 1.002	Yes	****	< 0.0001
Figure 7_S2a		HIF2a expression after si- and/or DFO treatment
	-DFO						+DFO
	siControl	siHIF1a	siHIF2a	siHIF1a + siHIF2a			siControl	siHIF1a	siHIF2a	siHIF1a + siHIF2a
	1.3055	0.879409	0.0940523	0.203712			0.927406	1.01838	0.160014	0.131786
	0.694769	0.904133	0.149126	0.15654			0.956789	0.880426	0.166809	0.155639
	0.999727	1.05307	0.144046	0.116194			1.02191	0.850435	0.162248	0.149299
Ordinary one way ANOVA
Alpha	0.05						0.05
Tukey's multiple comparisons test	Mean Diff.	95% CI of diff.	Significant?	Summary	Adjusted P Value		Mean Diff.	95% CI of diff.	Significant?	Summary	Adjusted P Value
siControl vs. siHIF1a	0.05446	-0.3690 to 0.4779	No	ns	0.9749		0.05229	-0.08184 to 0.1864	No	ns	0.6165
siControl vs. siHIF2a	0.8709	0.4475 to 1.294	Yes	***	0.0008		0.8057	0.6715 to 0.9398	Yes	****	< 0.0001
siControl vs. siHIF1a + siHIF2a	0.8412	0.4177 to 1.265	Yes	***	0.001		0.8231	0.6890 to 0.9573	Yes	****	< 0.0001
siHIF1a vs. siHIF2a	0.8165	0.3930 to 1.240	Yes	**	0.0012		0.7534	0.6193 to 0.8875	Yes	****	< 0.0001
siHIF1a vs. siHIF1a + siHIF2a	0.7867	0.3633 to 1.210	Yes	**	0.0015		0.7708	0.6367 to 0.9050	Yes	****	< 0.0001
siHIF2a vs. siHIF1a + siHIF2a	-0.02974	-0.4532 to 0.3937	No	ns	0.9957		0.01745	-0.1167 to 0.1516	No	ns	0.9741
Figure 7_S2b	ACTIN								HIF1alpha
									HIF2alpha
Figure 7_S2c		HIF1a expression after si treatment in transgenic hepatocytes (qPCR)
Table Analyzed	WT						[Apc]ko-TOTAL						[Arid1a]ko-TOTAL						[Apc-Arid1a]ko-TOTAL
Raw data	siControl	siHIF1a	siHIF2a	siHIF1a + siHIF2a			siControl	siHIF1a	siHIF2a	siHIF1a + siHIF2a			siControl	siHIF1a	siHIF2a	siHIF1a + siHIF2a			siControl	siHIF1a	siHIF2a	siHIF1a + siHIF2a
	1.2437	0.0553467	1.19718	0.100456			1.00523	0.215765	1.25922	0.149429			0.966522	0.0522246	1.12184	0.0890571			0.934439	0.169243	1.72569	0.306121
	1.17254	0.0821634	1.21811	0.0930816			1.05887	0.178938	1.23759	0.140392			1.00408	0.0473949	1.09496	0.0836711			1.06597	0.15956	1.08461	0.257416
	1.26544	0.0761317	1.26106	0.111463			0.761825	0.189797	0.905967	0.3192			1.07615	0.0667945	0.953215	0.0788839			0.777639	0.174606	0.75115	0.289608
	0.757669	0.0349065	1.46372	0.0599391			1.06255	0.102773	1.14277	0.0888509			0.963178	0.0548211	1.25342	0.0866218			0.83925	0.128708	1.28091	0.230394
	0.826244	0.0892899	1.04582	0.0329093			1.11152	0.175255	1.19543	0.109768			0.943356	0.0462589	1.13357	0.0903003			1.22025	0.111273	1.28091	0.270214
	0.734401	0.0618381	0.846534	0.0519995				0.12609	1.25052				1.04672	0.0761968	0.930368	0.0866218			1.16245	0.151477	0.97412	0.217212
Ordinary one way ANOVA
Alpha	0.05						0.05						0.05						0.05
Tukey's multiple comparisons test	Mean Diff.	95% CI of diff.	Significant?	Summary	Adjusted P Value		Mean Diff.	95% CI of diff.	Significant?	Summary	Adjusted P Value		Mean Diff.	95% CI of diff.	Significant?	Summary	Adjusted P Value		Mean Diff.	95% CI of diff.	Significant?	Summary	Adjusted P Value
siControl vs. siHIF1a	0.9334	0.6670 to 1.200	Yes	****	< 0.0001		0.8352	0.6509 to 1.020	Yes	****	< 0.0001		0.9427	0.8356 to 1.050	Yes	****	< 0.0001		0.8509	0.5440 to 1.158	Yes	****	< 0.0001
siControl vs. siHIF2a	-0.1721	-0.4385 to 0.09433	No	ns	0.2989		-0.1652	-0.3496 to 0.01909	No	ns	0.0881		-0.08123	-0.1883 to 0.02586	No	ns	0.18		-0.1829	-0.4898 to 0.1240	No	ns	0.3655
siControl vs. siHIF1a + siHIF2a	0.925	0.6586 to 1.191	Yes	****	< 0.0001		0.8385	0.6459 to 1.031	Yes	****	< 0.0001		0.9141	0.8070 to 1.021	Yes	****	< 0.0001		0.7382	0.4313 to 1.045	Yes	****	< 0.0001
siHIF1a vs. siHIF2a	-1.105	-1.372 to -0.8391	Yes	****	< 0.0001		-1	-1.176 to -0.8247	Yes	****	< 0.0001		-1.024	-1.131 to -0.9169	Yes	****	< 0.0001		-1.034	-1.341 to -0.7269	Yes	****	< 0.0001
siHIF1a vs. siHIF1a + siHIF2a	-0.008362	-0.2748 to 0.2580	No	ns	0.9997		0.003242	-0.1811 to 0.1876	No	ns	> 0.9999		-0.02858	-0.1357 to 0.07852	No	ns	0.8769		-0.1127	-0.4195 to 0.1942	No	ns	0.7354
siHIF2a vs. siHIF1a + siHIF2a	1.097	0.8307 to 1.363	Yes	****	< 0.0001		1.004	0.8194 to 1.188	Yes	****	< 0.0001		0.9954	0.8883 to 1.102	Yes	****	< 0.0001		0.9211	0.6142 to 1.228	Yes	****	< 0.0001
Figure 7_S2d		HIF2a expression after si treatment in transgenic hepatocytes (qPCR)
Table Analyzed	WT						[Apc]ko-TOTAL						[Arid1a]ko-TOTAL						[Apc-Arid1a]ko-TOTAL
	siControl	siHIF1a	siHIF2a	siHIF1a + siHIF2a			siControl	siHIF1a	siHIF2a	siHIF1a + siHIF2a			siControl	siHIF1a	siHIF2a	siHIF1a + siHIF2a			siControl	siHIF1a	siHIF2a	siHIF1a + siHIF2a
	1.02325	0.893886	0.123122	0.163591			1.0837	1.03595	0.437077	0.276617			0.982356	0.861139	0.313018	0.342534			0.880817	0.987542	0.150404	0.125166
	0.686896	0.935081	0.112124	0.159117			1.03237	1.09882	0.388493	0.273755			0.999527	1.30524	0.318489	0.300267			0.756239	0.656067	0.141308	0.118414
	1.00219	1.00219	0.134266	0.176552			0.865112	0.859137	0.238318	0.631108			1.05286	1.04197	0.233957	0.276302			0.918222	1.43586	0.160641	0.147309
	1.23385	0.789036	0.229754	0.14143			1.01816	1.40538	0.298532	0.195598			0.996069	0.852232	0.352164	0.350945			1.05111	0.918222	0.205458	0.176399
	1.04114	0.887712	0.114084	0.0685435			1.00066	0.990315	0.250166	0.198328			0.952187	1.0312	0.346114	0.327443			1.07692	0.987542	0.193032	0.225612
	1.01267	1.13537	0.0959325	0.101754				0.821288	0.252781				1.017	1.14816	0.259592	0.322935			1.31669	0.782908	0.186457	0.141798
Ordinary one way ANOVA
Alpha	0.05						0.05						0.05						0.05
Tukey's multiple comparisons test	Mean Diff.	95% CI of diff.	Significant?	Summary	Adjusted P Value		Mean Diff.	95% CI of diff.	Significant?	Summary	Adjusted P Value		Mean Diff.	95% CI of diff.	Significant?	Summary	Adjusted P Value		Mean Diff.	95% CI of diff.	Significant?	Summary	Adjusted P Value
siControl vs. siHIF1a	0.05945	-0.1194 to 0.2384	No	ns	0.7892		-0.03515	-0.2940 to 0.2237	No	ns	0.9802		-0.03999	-0.1890 to 0.1091	No	ns	0.8752		0.03864	-0.2303 to 0.3075	No	ns	0.9774
siControl vs. siHIF2a	0.8651	0.6862 to 1.044	Yes	****	< 0.0001		0.6891	0.4302 to 0.9480	Yes	****	< 0.0001		0.6961	0.5471 to 0.8452	Yes	****	< 0.0001		0.8271	0.5582 to 1.096	Yes	****	< 0.0001
siControl vs. siHIF1a + siHIF2a	0.8648	0.6859 to 1.044	Yes	****	< 0.0001		0.6849	0.4145 to 0.9553	Yes	****	< 0.0001		0.6799	0.5309 to 0.8290	Yes	****	< 0.0001		0.8442	0.5753 to 1.113	Yes	****	< 0.0001
siHIF1a vs. siHIF2a	0.8057	0.6268 to 0.9846	Yes	****	< 0.0001		0.7243	0.4774 to 0.9711	Yes	****	< 0.0001		0.7361	0.5870 to 0.8852	Yes	****	< 0.0001		0.7885	0.5196 to 1.057	Yes	****	< 0.0001
siHIF1a vs. siHIF1a + siHIF2a	0.8054	0.6265 to 0.9843	Yes	****	< 0.0001		0.7201	0.4612 to 0.9789	Yes	****	< 0.0001		0.7199	0.5709 to 0.8690	Yes	****	< 0.0001		0.8056	0.5367 to 1.074	Yes	****	< 0.0001
siHIF2a vs. siHIF1a + siHIF2a	-0.0002843	-0.1792 to 0.1786	No	ns	> 0.9999		-0.004187	-0.2631 to 0.2547	No	ns	> 0.9999		-0.01618	-0.1652 to 0.1329	No	ns	0.99		0.0171	-0.2518 to 0.2860	No	ns	0.9979
Figure 7_S2e		Left: WT and ARID1AKO / ARID1A antibody											Right: Apcko and doubleKO / ARID1A antibody
Figure 7_S2e		Left: WT and ARID1AKO / HIF1a HIF2a antibody											Right: Apcko and doubleKO / HIF1a HIF2a antibody
									HIF1a													HIF1a
									HIF2a
																						HIF2a
Figure 7_S2e		Left: WT and ARID1AKO / GS antibody											Right: Apcko and doubleKO / GS antibody
Figure 7_S2e		Left: WT and ARID1AKO / Actin antibody											Right: Apcko and doubleKO / Actin antibody
