# Supplementary material for: ARID1A loss in adult hepatocytes activates β-catenin-mediated erythropoietin transcription
Source: eLife journal article supplement (doi:10.7554/elife.53550), 2020-10-21
Supplement: supp [file elife-53550-supp-v1.zip › elife_poa_e53550_Figure_8_source_data_1.xlsx]

## Sheet: Figure 8
	Figure 8a								Figure 8b								Figure 8c
Figure 8d		ChIP qPCR on Axin2 intronic enhancer
Raw data	WT			[Apc]ko			[Arid1a]ko			[Apc-Arid1a]ko
IgG	0.34871	0.156052	0.414689	0.30043	0.547185		0.539652	0.166097		1.00354	0.687819	1.22697
TCF4	0.355243	0.197524	0.279341	10.5926	12.3711		0.734636	1.13296		6.96489	10.967	11.0433
H3K27Ac	0.430803	0.514093	0.592588	0.327621	0.338001		0.363519	0.228474		0.671333	0.378956	0.562569
H3K27Me3	8.54512	4.73239	10.4839	0.372445	0.421937		0.26519	0.293229		1.87268	1.6667	1.36141
Two-way ANOVA
Alpha	0.05
Bonferroni's multiple comparisons test	Mean Diff.	95% CI of diff.	Significant?	Summary	Adjusted P Value		Mean 1	Mean 2	Mean Diff.	SE of diff.	N1	N2	t	DF
ChIP antibody effect
WT
IgG vs. TCF4	0.02911	-2.327 to 2.385	No	ns	> 0.9999		0.3065	0.2774	0.02911	0.9154	3	3	0.0318	24
IgG vs. H3K27Ac	-0.206	-2.562 to 2.150	No	ns	> 0.9999		0.3065	0.5125	-0.206	0.9154	3	3	0.225	24
IgG vs. H3K27Me3	-7.614	-9.970 to -5.258	Yes	****	< 0.0001		0.3065	7.92	-7.614	0.9154	3	3	8.318	24
[Apc]ko
IgG vs. TCF4	-11.06	-13.94 to -8.173	Yes	****	< 0.0001		0.4238	11.48	-11.06	1.121	2	2	9.863	24
IgG vs. H3K27Ac	0.091	-2.794 to 2.976	No	ns	> 0.9999		0.4238	0.3328	0.091	1.121	2	2	0.08116	24
IgG vs. H3K27Me3	0.02662	-2.859 to 2.912	No	ns	> 0.9999		0.4238	0.3972	0.02662	1.121	2	2	0.02374	24
[Arid1a]ko
IgG vs. TCF4	-0.5809	-3.466 to 2.304	No	ns	> 0.9999		0.3529	0.9338	-0.5809	1.121	2	2	0.5182	24
IgG vs. H3K27Ac	0.05688	-2.829 to 2.942	No	ns	> 0.9999		0.3529	0.296	0.05688	1.121	2	2	0.05073	24
IgG vs. H3K27Me3	0.07366	-2.812 to 2.959	No	ns	> 0.9999		0.3529	0.2792	0.07366	1.121	2	2	0.06571	24
[Apc-Arid1a]ko
IgG vs. TCF4	-8.686	-11.04 to -6.330	Yes	****	< 0.0001		0.9728	9.658	-8.686	0.9154	3	3	9.488	24
IgG vs. H3K27Ac	0.4352	-1.921 to 2.791	No	ns	> 0.9999		0.9728	0.5376	0.4352	0.9154	3	3	0.4754	24
IgG vs. H3K27Me3	-0.6608	-3.017 to 1.695	No	ns	> 0.9999		0.9728	1.634	-0.6608	0.9154	3	3	0.7219	24
Genotype effect
IgG
WT vs. [Apc]ko	-0.1173	-2.751 to 2.517	No	ns	> 0.9999		0.3065	0.4238	-0.1173	1.023	3	2	0.1146	24
WT vs. [Arid1a]ko	-0.04639	-2.680 to 2.588	No	ns	> 0.9999		0.3065	0.3529	-0.04639	1.023	3	2	0.04533	24
WT vs. [Apc-Arid1a]ko	-0.6663	-3.022 to 1.690	No	ns	> 0.9999		0.3065	0.9728	-0.6663	0.9154	3	3	0.7279	24
TCF4
WT vs. [Apc]ko	-11.2	-13.84 to -8.571	Yes	****	< 0.0001		0.2774	11.48	-11.2	1.023	3	2	10.95	24
WT vs. [Arid1a]ko	-0.6564	-3.290 to 1.978	No	ns	> 0.9999		0.2774	0.9338	-0.6564	1.023	3	2	0.6414	24
WT vs. [Apc-Arid1a]ko	-9.381	-11.74 to -7.025	Yes	****	< 0.0001		0.2774	9.658	-9.381	0.9154	3	3	10.25	24
H3K27Ac
WT vs. [Apc]ko	0.1797	-2.454 to 2.814	No	ns	> 0.9999		0.5125	0.3328	0.1797	1.023	3	2	0.1756	24
WT vs. [Arid1a]ko	0.2165	-2.418 to 2.851	No	ns	> 0.9999		0.5125	0.296	0.2165	1.023	3	2	0.2115	24
WT vs. [Apc-Arid1a]ko	-0.02512	-2.381 to 2.331	No	ns	> 0.9999		0.5125	0.5376	-0.02512	0.9154	3	3	0.02745	24
H3K27Me3
WT vs. [Apc]ko	7.523	4.889 to 10.16	Yes	****	< 0.0001		7.92	0.3972	7.523	1.023	3	2	7.351	24
WT vs. [Arid1a]ko	7.641	5.007 to 10.28	Yes	****	< 0.0001		7.92	0.2792	7.641	1.023	3	2	7.466	24
WT vs. [Apc-Arid1a]ko	6.287	3.931 to 8.643	Yes	****	< 0.0001		7.92	1.634	6.287	0.9154	3	3	6.868	24
Figure 8e		ChIP qPCR on Epo 3' enhancer
Raw data	WT			[Apc]ko			[Arid1a]ko			[Apc-Arid1a]ko
IgG	0.368487	0.113415	0.283159	0.530228	0.755072		0.25876	0.7421		0.098392	0.442787	0.196784
TCF4	1.2876	0.574224	0.641573	2.09171	2.45323		1.2876	0.692404		4.87258	7.35989	5.13258
H3K27Ac	1.38962	0.714341	0.393568	0.910471	0.792611		3.62928	3.80972		5.35054	8.08185	4.37622
H3K27Me3	15.0291	12.6818	10.4446	6.1249	11.2331		1.7347	1.68143		1.78966	6.58729	2.22636
Two-way ANOVA
Alpha	0.05
Bonferroni's multiple comparisons test	Mean Diff.	95% CI of diff.	Significant?	Summary	Adjusted P Value		Mean 1	Mean 2	Mean Diff.	SE of diff.	N1	N2	t	DF
ChIP antibody effect
WT
IgG vs. TCF4	-0.5794	-3.615 to 2.456	No	ns	> 0.9999		0.255	0.8345	-0.5794	1.18	3	3	0.4913	24
IgG vs. H3K27Ac	-0.5775	-3.613 to 2.458	No	ns	> 0.9999		0.255	0.8325	-0.5775	1.18	3	3	0.4896	24
IgG vs. H3K27Me3	-12.46	-15.50 to -9.428	Yes	****	< 0.0001		0.255	12.72	-12.46	1.18	3	3	10.57	24
[Apc]ko
IgG vs. TCF4	-1.63	-5.348 to 2.088	No	ns	0.8111		0.6426	2.272	-1.63	1.445	2	2	1.128	24
IgG vs. H3K27Ac	-0.2089	-3.927 to 3.509	No	ns	> 0.9999		0.6426	0.8515	-0.2089	1.445	2	2	0.1446	24
IgG vs. H3K27Me3	-8.036	-11.75 to -4.318	Yes	****	< 0.0001		0.6426	8.679	-8.036	1.445	2	2	5.563	24
[Arid1a]ko
IgG vs. TCF4	-0.4896	-4.207 to 3.228	No	ns	> 0.9999		0.5004	0.99	-0.4896	1.445	2	2	0.3389	24
IgG vs. H3K27Ac	-3.219	-6.937 to 0.4988	No	ns	0.1065		0.5004	3.72	-3.219	1.445	2	2	2.228	24
IgG vs. H3K27Me3	-1.208	-4.926 to 2.510	No	ns	> 0.9999		0.5004	1.708	-1.208	1.445	2	2	0.836	24
[Apc-Arid1a]ko
IgG vs. TCF4	-5.542	-8.578 to -2.507	Yes	***	0.0003		0.246	5.788	-5.542	1.18	3	3	4.699	24
IgG vs. H3K27Ac	-5.69	-8.726 to -2.655	Yes	***	0.0002		0.246	5.936	-5.69	1.18	3	3	4.824	24
IgG vs. H3K27Me3	-3.288	-6.324 to -0.2528	Yes	*	0.0306		0.246	3.534	-3.288	1.18	3	3	2.788	24
Genotype effect
IgG
WT vs. [Apc]ko	-0.3876	-3.782 to 3.006	No	ns	> 0.9999		0.255	0.6426	-0.3876	1.319	3	2	0.2939	24
WT vs. [Arid1a]ko	-0.2454	-3.639 to 3.149	No	ns	> 0.9999		0.255	0.5004	-0.2454	1.319	3	2	0.1861	24
WT vs. [Apc-Arid1a]ko	0.009033	-3.027 to 3.045	No	ns	> 0.9999		0.255	0.246	0.009033	1.18	3	3	0.007658	24
TCF4
WT vs. [Apc]ko	-1.438	-4.832 to 1.956	No	ns	0.859		0.8345	2.272	-1.438	1.319	3	2	1.09	24
WT vs. [Arid1a]ko	-0.1555	-3.549 to 3.238	No	ns	> 0.9999		0.8345	0.99	-0.1555	1.319	3	2	0.1179	24
WT vs. [Apc-Arid1a]ko	-4.954	-7.990 to -1.918	Yes	***	0.001		0.8345	5.788	-4.954	1.18	3	3	4.2	24
H3K27Ac
WT vs. [Apc]ko	-0.01903	-3.413 to 3.375	No	ns	> 0.9999		0.8325	0.8515	-0.01903	1.319	3	2	0.01443	24
WT vs. [Arid1a]ko	-2.887	-6.281 to 0.5070	No	ns	0.1156		0.8325	3.72	-2.887	1.319	3	2	2.189	24
WT vs. [Apc-Arid1a]ko	-5.104	-8.139 to -2.068	Yes	***	0.0007		0.8325	5.936	-5.104	1.18	3	3	4.327	24
H3K27Me3
WT vs. [Apc]ko	4.039	0.6455 to 7.433	Yes	*	0.016		12.72	8.679	4.039	1.319	3	2	3.063	24
WT vs. [Arid1a]ko	11.01	7.616 to 14.40	Yes	****	< 0.0001		12.72	1.708	11.01	1.319	3	2	8.349	24
WT vs. [Apc-Arid1a]ko	9.184	6.148 to 12.22	Yes	****	< 0.0001		12.72	3.534	9.184	1.18	3	3	7.786	24
Figure 8f		ATAC-qPCR
Raw data	Axin2 intron				Glul Pr				EPO enhancer
	WT	Apcko	Arid1a ko	Apc-Arid1a ko	WT	Apcko	Arid1a ko	Apc-Arid1a ko	WT	Apcko	Arid1a ko	Apc-Arid1a ko
	0.76	5.91	0.29	3.04	0.46	3.5	0.86	1.47	0.75	3.92	1.36	1.3
	0.68	3.9	0.95	2.32	1.86	1.9	0.94	2.44	2.7	4.17	0.87	2.64
	0.49	7.18	1.61	2.78	0.78	4.28	1.47	2.46	1.17	5.17	2.12	1.99
	0.93	1.31	0.22	1.42	1.03	1.67	1.01	1.58	0.82	1.3	0.9	1.42
	2.82	9.8	1.27	2.24	1.94	9.1	3.88	2.46	0.91	2.77	1.61	2.19
	0.88	2.78	1.18	1.32	0.61	3.24	1.08	1.44	0.37	2.72	0.67	1.75
	0.43	7.18		2.52	0.33	3.5		1.26	0.28	2.16		1.03
Ordinary one-way ANOVA
Alpha	0.05
Tukey's multiple comparisons test	Mean Diff.	95% CI of diff.	Significant?	Summary	Adjusted P Value		Mean 1	Mean 2	Mean Diff.	SE of diff.	n1	n2	q	DF
AXIN2 intron
WT vs. Apcko	-4.439	-6.827 to -2.050	Yes	***	0.0002	A-B	0.9986	5.437	-4.439	0.863	7	7	7.273	23
WT vs. Arid1a ko	0.07857	-2.407 to 2.564	No	ns	0.9998	A-C	0.9986	0.92	0.07857	0.8983	7	6	0.1237	23
WT vs. Apc-Arid1a ko	-1.236	-3.624 to 1.153	No	ns	0.4932	A-D	0.9986	2.234	-1.236	0.863	7	7	2.025	23
Apcko vs. Arid1a ko	4.517	2.031 to 7.003	Yes	***	0.0002	B-C	5.437	0.92	4.517	0.8983	7	6	7.112	23
Apcko vs. Apc-Arid1a ko	3.203	0.8146 to 5.591	Yes	**	0.0059	B-D	5.437	2.234	3.203	0.863	7	7	5.249	23
Arid1a ko vs. Apc-Arid1a ko	-1.314	-3.800 to 1.171	No	ns	0.4749	C-D	0.92	2.234	-1.314	0.8983	6	7	2.069	23
GLUL promoter
WT vs. Apcko	-2.883	-5.022 to -0.7439	Yes	**	0.0056	A-B	1.001	3.884	-2.883	0.7729	7	7	5.275	23
WT vs. Arid1a ko	-0.5386	-2.765 to 1.688	No	ns	0.9075	A-C	1.001	1.54	-0.5386	0.8045	7	6	0.9467	23
WT vs. Apc-Arid1a ko	-0.8714	-3.010 to 1.268	No	ns	0.6768	A-D	1.001	1.873	-0.8714	0.7729	7	7	1.594	23
Apcko vs. Arid1a ko	2.344	0.1180 to 4.571	Yes	*	0.0365	B-C	3.884	1.54	2.344	0.8045	7	6	4.121	23
Apcko vs. Apc-Arid1a ko	2.011	-0.1275 to 4.150	No	ns	0.0704	B-D	3.884	1.873	2.011	0.7729	7	7	3.68	23
Arid1a ko vs. Apc-Arid1a ko	-0.3329	-2.559 to 1.893	No	ns	0.9756	C-D	1.54	1.873	-0.3329	0.8045	6	7	0.5851	23
EPO enhancer
WT vs. Apcko	-2.173	-3.472 to -0.8733	Yes	***	0.0006	A-B	1	3.173	-2.173	0.4696	7	7	6.543	23
WT vs. Arid1a ko	-0.255	-1.608 to 1.098	No	ns	0.953	A-C	1	1.255	-0.255	0.4888	7	6	0.7378	23
WT vs. Apc-Arid1a ko	-0.76	-2.060 to 0.5396	No	ns	0.3885	A-D	1	1.76	-0.76	0.4696	7	7	2.289	23
Apcko vs. Arid1a ko	1.918	0.5652 to 3.270	Yes	**	0.0035	B-C	3.173	1.255	1.918	0.4888	7	6	5.549	23
Apcko vs. Apc-Arid1a ko	1.413	0.1133 to 2.712	Yes	*	0.0297	B-D	3.173	1.76	1.413	0.4696	7	7	4.255	23
Arid1a ko vs. Apc-Arid1a ko	-0.505	-1.858 to 0.8476	No	ns	0.7321	C-D	1.255	1.76	-0.505	0.4888	6	7	1.461	23
