# Supplementary material for: ARID1A loss in adult hepatocytes activates β-catenin-mediated erythropoietin transcription
Source: eLife journal article supplement (doi:10.7554/elife.53550), 2020-10-21
Supplement: supp [file elife-53550-supp-v1.zip › elife_poa_e53550_Figure_8_source_data_2.xlsx]

## Sheet: Figure8_S1
Figure 8_S1		Expression of beta-catenin target mRNAs one week after panlobular hepatic gene inactivations
Table Analyzed	GS (Glul)						Axin 2
	WT	Apc ko	Arid1a ko	Double KO			WT	Apc ko	Arid1a ko	Double KO
	1.25384	39.8458	0.748127	27.9806			1.56464	63.1551	1.18989	45.438
	0.518119	28.4697	0.90523	38.4885			0.269962	59.7484	1.11406	62.9366
	1.22804			24.528			1.1654			44.5029
Ordinary one-way ANOVA
Alpha	0.05
Tukey's multiple comparisons test	Mean Diff.	95% CI of diff.	Significant?	Summary	Adjusted P Value		Mean Diff.	95% CI of diff.	Significant?	Summary	Adjusted P Value
WT vs. Apc ko	-33.16	-50.02 to -16.30	Yes	**	0.002		-60.45	-79.69 to -41.22	Yes	***	0.0002
WT vs. Arid1a ko	0.1733	-16.69 to 17.03	No	ns	> 0.9999		-0.152	-19.39 to 19.08	No	ns	> 0.9999
WT vs. Double KO	-29.33	-44.41 to -14.25	Yes	**	0.0021		-49.96	-67.16 to -32.75	Yes	***	0.0002
Apc ko vs. Arid1a ko	33.33	14.86 to 51.80	Yes	**	0.0032		60.3	39.23 to 81.37	Yes	***	0.0003
Apc ko vs. Double KO	3.825	-13.04 to 20.69	No	ns	0.8587		10.49	-8.743 to 29.73	No	ns	0.324
Arid1a ko vs. Double KO	-29.51	-46.37 to -12.64	Yes	**	0.0037		-49.81	-69.04 to -30.57	Yes	***	0.0004
