# Supplementary material for: ARID1A loss in adult hepatocytes activates β-catenin-mediated erythropoietin transcription
Source: eLife journal article supplement (doi:10.7554/elife.53550), 2020-10-21
Supplement: supp [file elife-53550-supp-v1.zip › elife_poa_e53550_Figure_8_source_data_3.xlsx]

## Sheet: Figure8_S1
Figure 8_S2		ATAC-qPCR
Raw data	EPO-enh-5' (1)				EPO-enhHIF (2)				EPO-enhHnf4 (3)				Hepatic 3' Epo enhancer
	WT	Apcko	Arid1a ko	Apc-Arid1a ko	WT	Apcko	Arid1a ko	Apc-Arid1a ko	WT	Apcko	Arid1a ko	Apc-Arid1a ko	WT	Apcko	Arid1a ko	Apc-Arid1a ko
	0.308376	1.57218	0.842508	0.813809	0.306131	2.89231	0.785792	0.785792	0.356414	3.76232	0.921224	1.15799	0.75	3.92	1.36	1.3
	3.21042	2.23886	0.563607	1.33123	2.62482	2.33305	0.483712	1.61577	2.67887	3.29808	0.583023	1.62634	2.7	4.17	0.87	2.64
	0.754066	2.89339	0.934821	0.909258	0.68883	3.14317	1.08089	1.11128	0.801972	3.63417	1.14205	1.25843	1.17	5.17	2.12	1.99
	0.872219	1.42678	0.638502	1.07383	0.665366	1.25025	0.674654	1.19104	0.790931	1.36758	0.813168	1.29381	0.82	1.3	0.9	1.42
	0.842508	3.10106	1.55053	2.39955	1.05865	3.73788	1.56073	2.5708	1.16605	5.03372	1.84245	2.64199	0.91	2.77	1.61	2.19
	0.670246	2.41624	0.612492	1.33123	0.656206	2.9943	0.575234	1.40661	0.807551	3.71053	0.655935	1.63765	0.37	2.72	0.67	1.75
	0.342165	3.76529		1.56132		3.76388		1.41639	0.398216	4.38211		1.90742	0.28	2.16		1.03
Two-way ANOVA
Alpha	0.05
Tukey's multiple comparisons test	Mean Diff,	95% CI of diff,	Significant?	Summary	Adjusted P Value
Enhancer 1
WT vs. Apcko	-1.49	-2,579 to -0,4007	Yes	**	0.0031
WT vs. Arid1ako	0.1436	-0,9902 to 1,277	No	ns	0.9874
WT vs. Dbko	-0.3457	-1,435 to 0,7436	No	ns	0.8398
Apcko vs. Arid1ako	1.634	0,4998 to 2,767	Yes	**	0.0016
Apcko vs. Dbko	1.144	0,05502 to 2,234	Yes	*	0.0356
Arid1ako vs. Dbko	-0.4893	-1,623 to 0,6445	No	ns	0.6724
Enhancer 2
WT vs. Apcko	-1.87	-3,004 to -0,7360	Yes	***	0.0002
WT vs. Arid1ako	0.1417	-1,035 to 1,318	No	ns	0.9891
WT vs. Dbko	-0.4426	-1,576 to 0,6911	No	ns	0.7372
Apcko vs. Arid1ako	2.011	0,8777 to 3,145	Yes	****	< 0,0001
Apcko vs. Dbko	1.427	0,3379 to 2,516	Yes	**	0.005
Arid1ako vs. Dbko	-0.5843	-1,718 to 0,5495	No	ns	0.5346
Enhancer 3
WT vs. Apcko	-2.596	-3,685 to -1,506	Yes	****	< 0,0001
WT vs. Arid1ako	0.009762	-1,124 to 1,144	No	ns	> 0,9999
WT vs. Dbko	-0.6457	-1,735 to 0,4436	No	ns	0.4115
Apcko vs. Arid1ako	2.605	1,472 to 3,739	Yes	****	< 0,0001
Apcko vs. Dbko	1.95	0,8607 to 3,039	Yes	****	< 0,0001
Arid1ako vs. Dbko	-0.6555	-1,789 to 0,4783	No	ns	0.4339
EPO enh
WT vs. Apcko	-2.173	-3,262 to -1,084	Yes	****	< 0,0001
WT vs. Arid1ako	-0.255	-1,389 to 0,8787	No	ns	0.9353
WT vs. Dbko	-0.76	-1,849 to 0,3293	No	ns	0.2679
Apcko vs. Arid1ako	1.918	0,7841 to 3,052	Yes	***	0.0002
Apcko vs. Dbko	1.413	0,3236 to 2,502	Yes	**	0.0055
Arid1ako vs. Dbko	-0.505	-1,639 to 0,6287	No	ns	0.6499
Test details	Mean 1	Mean 2	Mean Diff,	SE of diff,	N1	N2	q	DF
Enhancer 1
WT vs. Apcko	0.9986	2.489	-1.49	0.4162	7	7	5.063	91
WT vs. Arid1ako	0.9986	0.855	0.1436	0.4332	7	6	0.4687	91
WT vs. Dbko	0.9986	1.344	-0.3457	0.4162	7	7	1.175	91
Apcko vs. Arid1ako	2.489	0.855	1.634	0.4332	7	6	5.333	91
Apcko vs. Dbko	2.489	1.344	1.144	0.4162	7	7	3.888	91
Arid1ako vs. Dbko	0.855	1.344	-0.4893	0.4332	6	7	1.597	91
Enhancer 2
WT vs. Apcko	1.002	2.871	-1.87	0.4332	6	7	6.104	91
WT vs. Arid1ako	1.002	0.86	0.1417	0.4496	6	6	0.4457	91
WT vs. Dbko	1.002	1.444	-0.4426	0.4332	6	7	1.445	91
Apcko vs. Arid1ako	2.871	0.86	2.011	0.4332	7	6	6.566	91
Apcko vs. Dbko	2.871	1.444	1.427	0.4162	7	7	4.849	91
Arid1ako vs. Dbko	0.86	1.444	-0.5843	0.4332	6	7	1.907	91
Enhancer 3
WT vs. Apcko	1.001	3.597	-2.596	0.4162	7	7	8.82	91
WT vs. Arid1ako	1.001	0.9917	0.009762	0.4332	7	6	0.03187	91
WT vs. Dbko	1.001	1.647	-0.6457	0.4162	7	7	2.194	91
Apcko vs. Arid1ako	3.597	0.9917	2.605	0.4332	7	6	8.506	91
Apcko vs. Dbko	3.597	1.647	1.95	0.4162	7	7	6.626	91
Arid1ako vs. Dbko	0.9917	1.647	-0.6555	0.4332	6	7	2.14	91
EPO enh
WT vs. Apcko	1	3.173	-2.173	0.4162	7	7	7.383	91
WT vs. Arid1ako	1	1.255	-0.255	0.4332	7	6	0.8325	91
WT vs. Dbko	1	1.76	-0.76	0.4162	7	7	2.582	91
Apcko vs. Arid1ako	3.173	1.255	1.918	0.4332	7	6	6.261	91
Apcko vs. Dbko	3.173	1.76	1.413	0.4162	7	7	4.801	91
Arid1ako vs. Dbko	1.255	1.76	-0.505	0.4332	6	7	1.649	91
