# Supplementary figures and images for: ARID1A loss in adult hepatocytes activates β-catenin-mediated erythropoietin transcription
Source: eLife journal article supplement (doi:10.7554/elife.53550), 2020-10-21

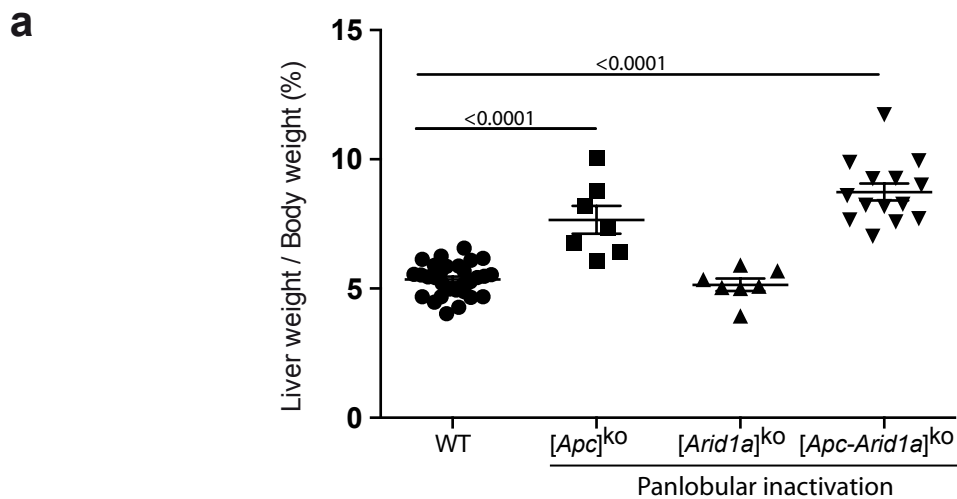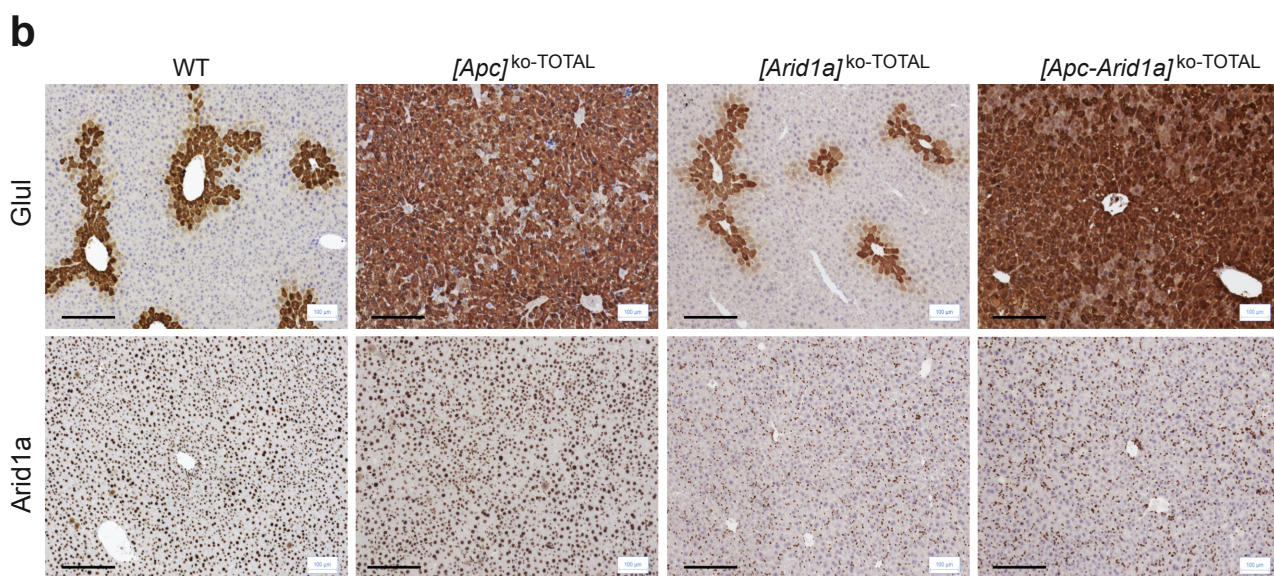

**Figure 5-figure Supplement 1: Panlobular inactivation of Apc and/or Arid1a in hepatocytes**

Supplement: supp [file elife-53550-supp-v1.zip]

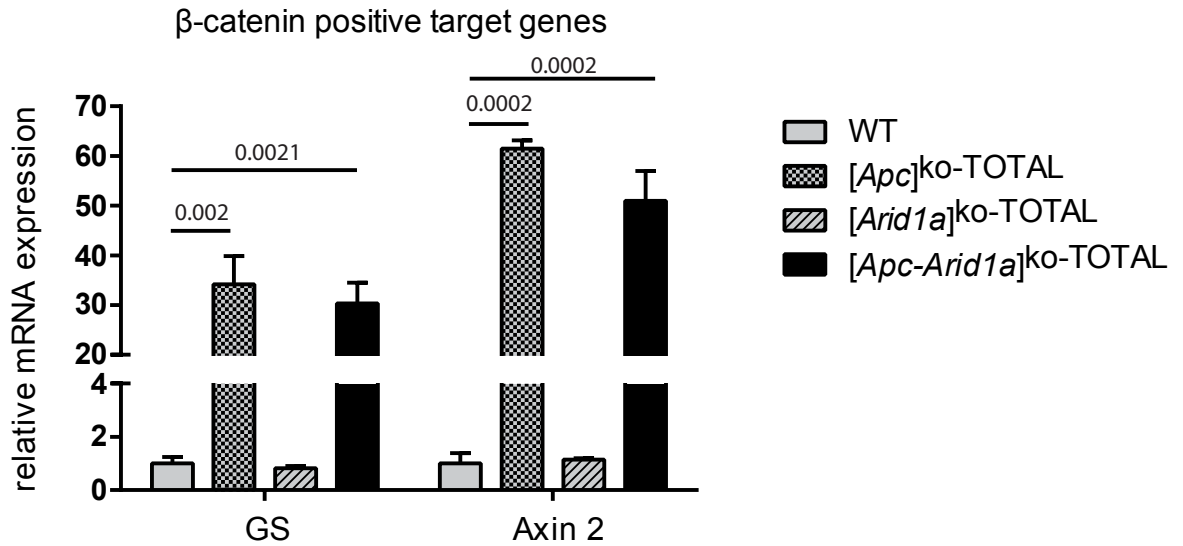

**Figure 8-figure Supplement 1:** The expression of GS and Axin2 is not modulated by Arid1a status

Supplement: supp [file elife-53550-supp-v1.zip]

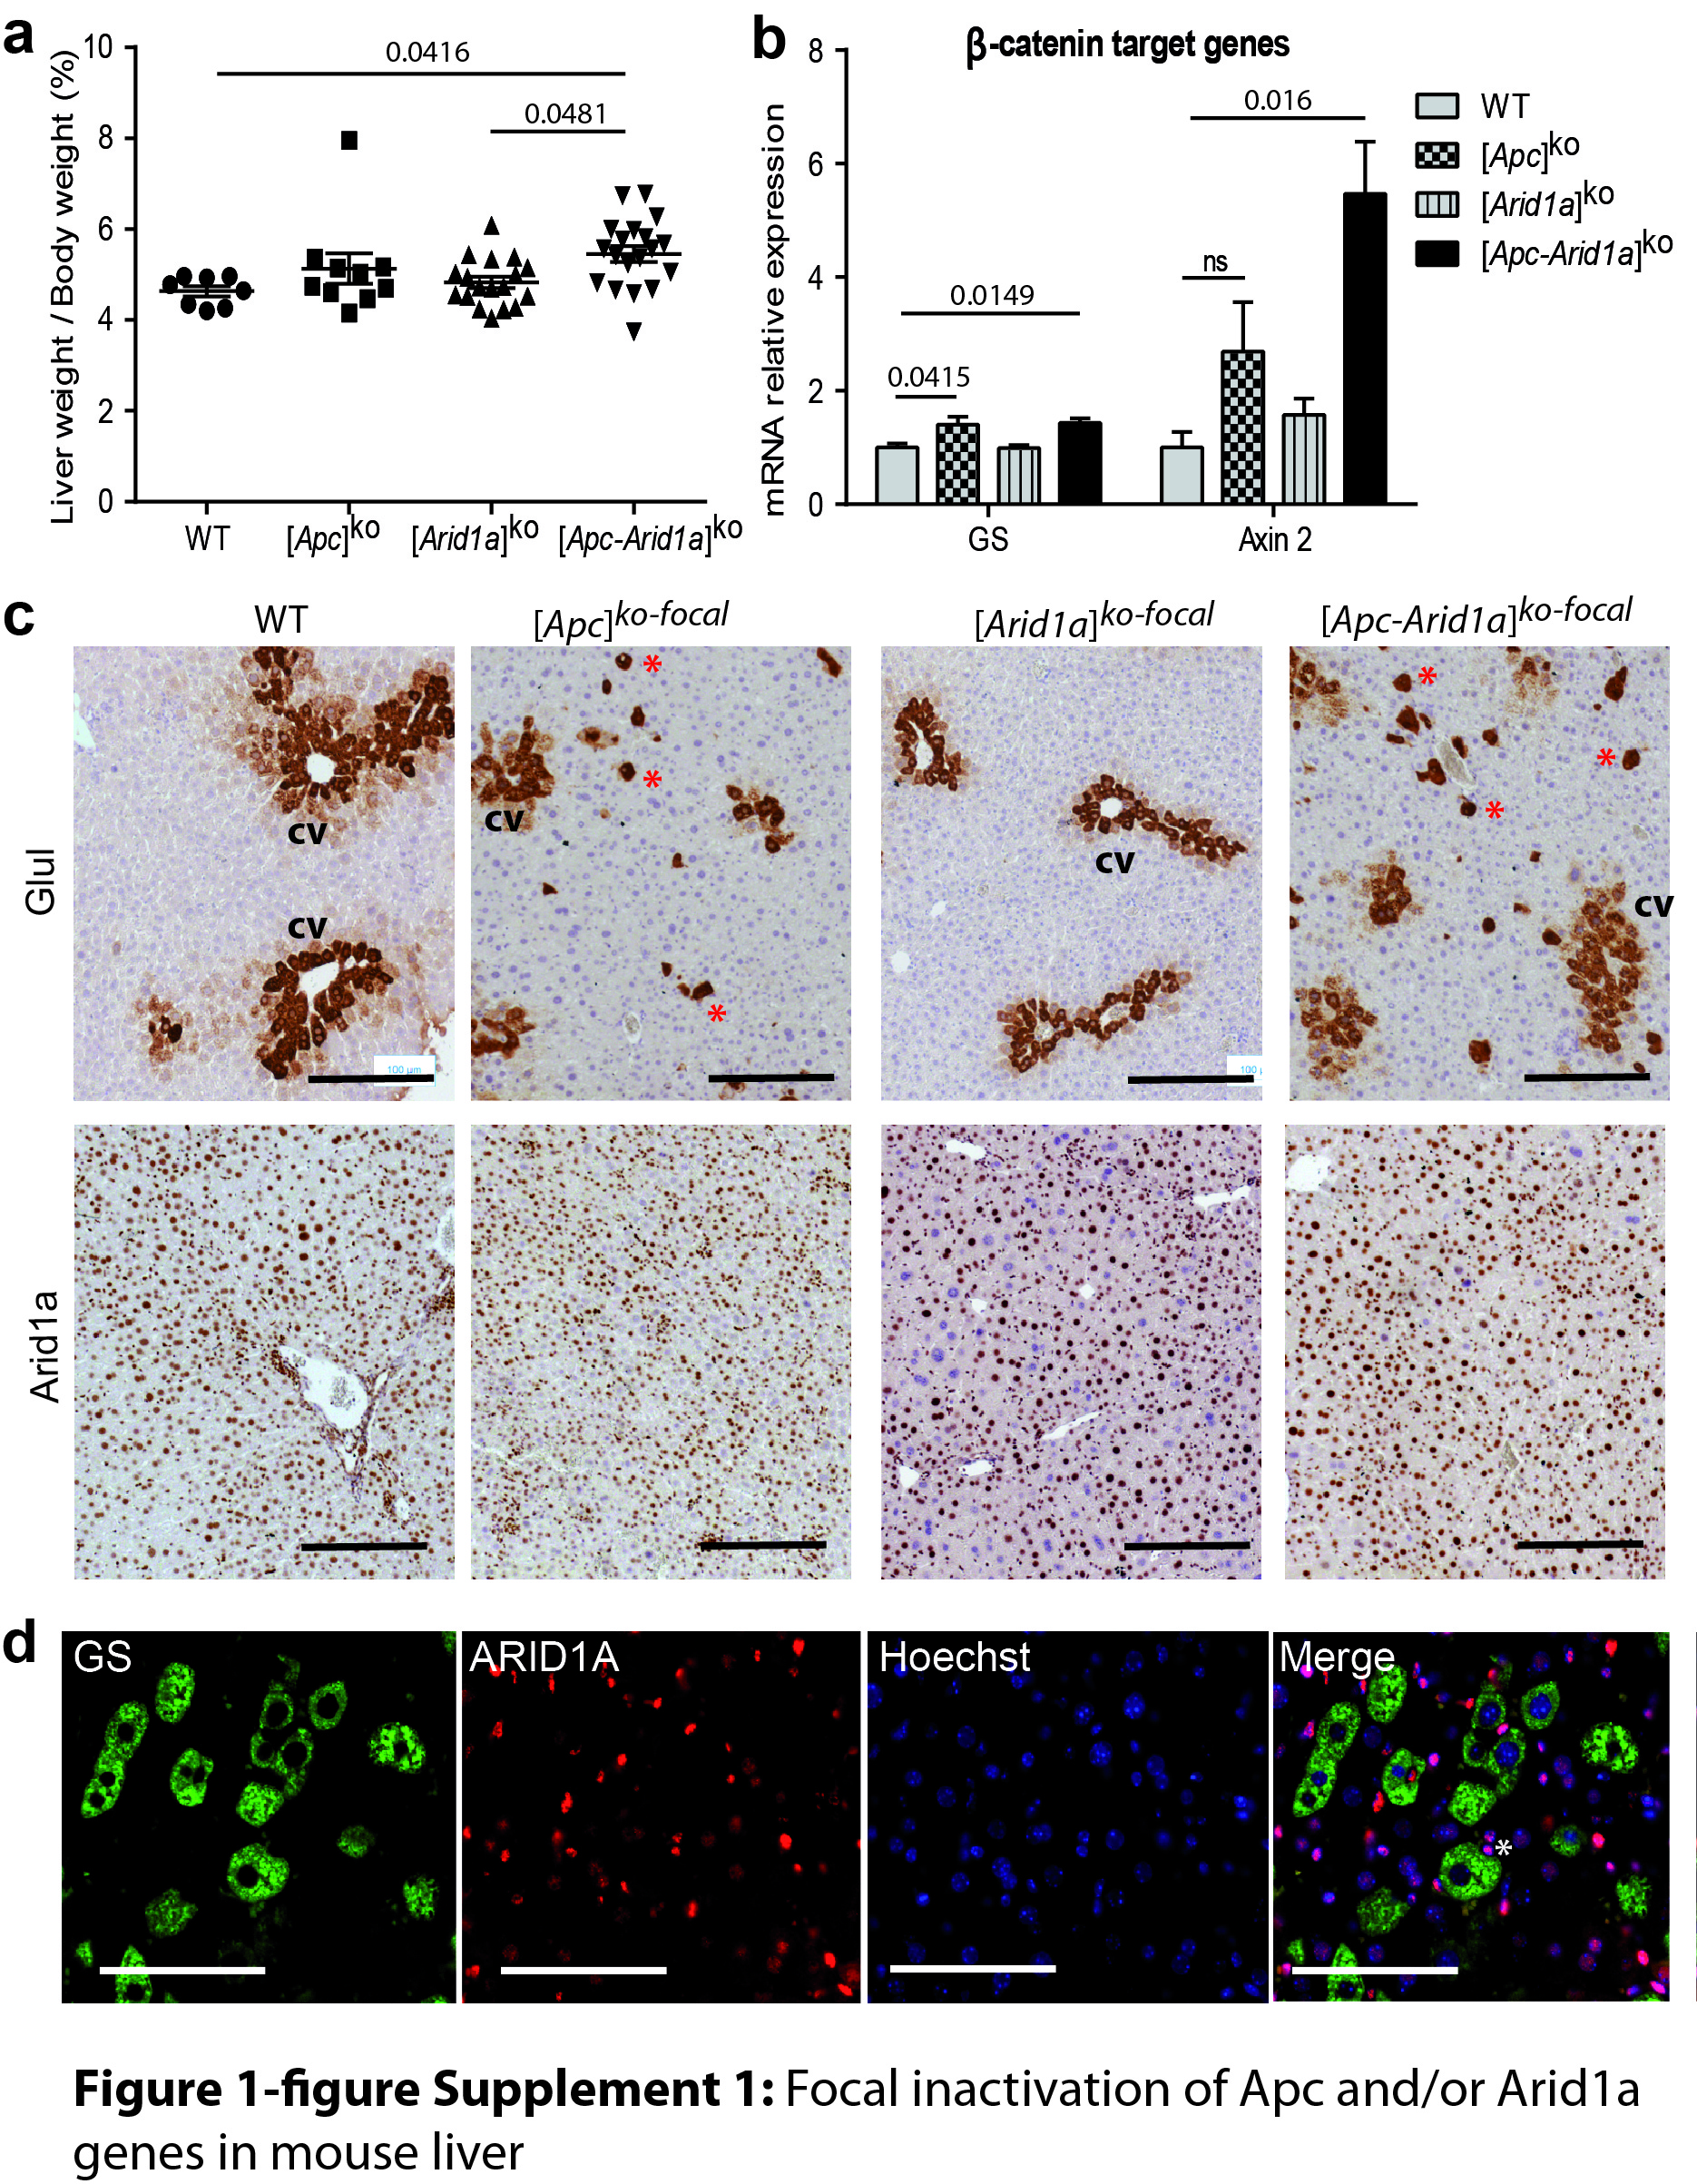

Supplement: supp [file elife-53550-supp-v1.zip › elife_poa_e53550_Figure_1_figure_supplement_1.jpg]

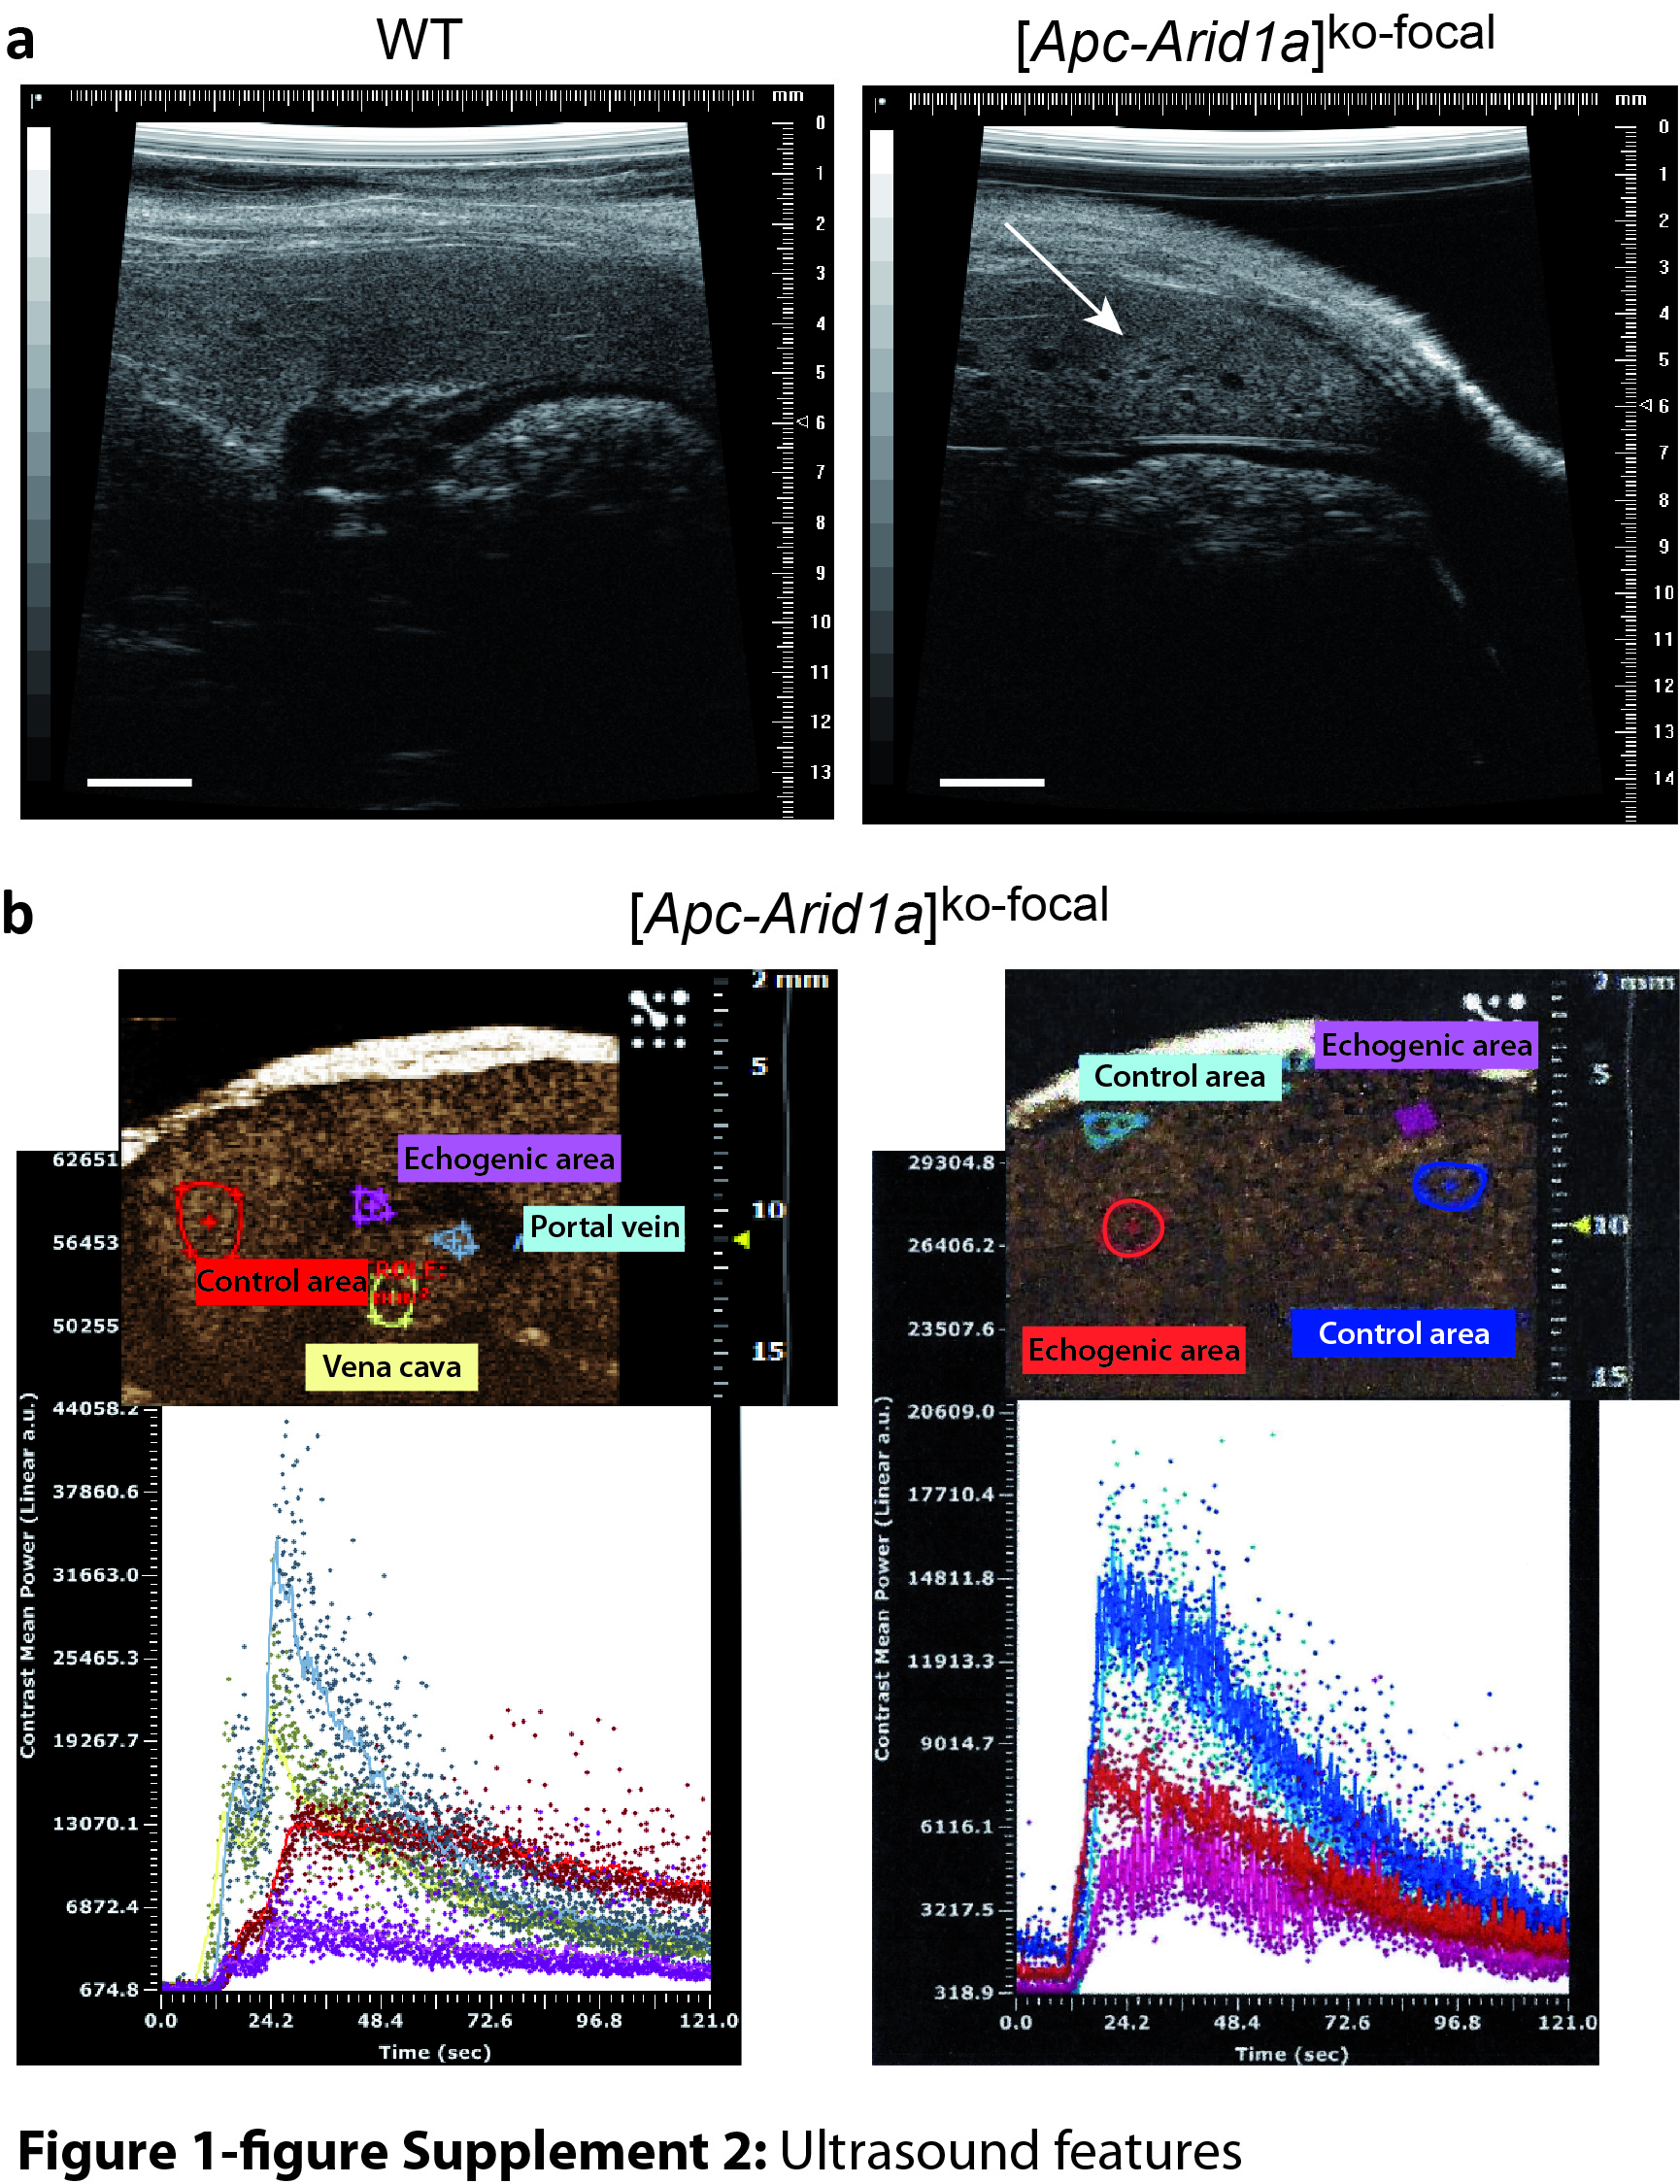

Supplement: supp [file elife-53550-supp-v1.zip › elife_poa_e53550_Figure_1_figure_supplement_2.jpg]

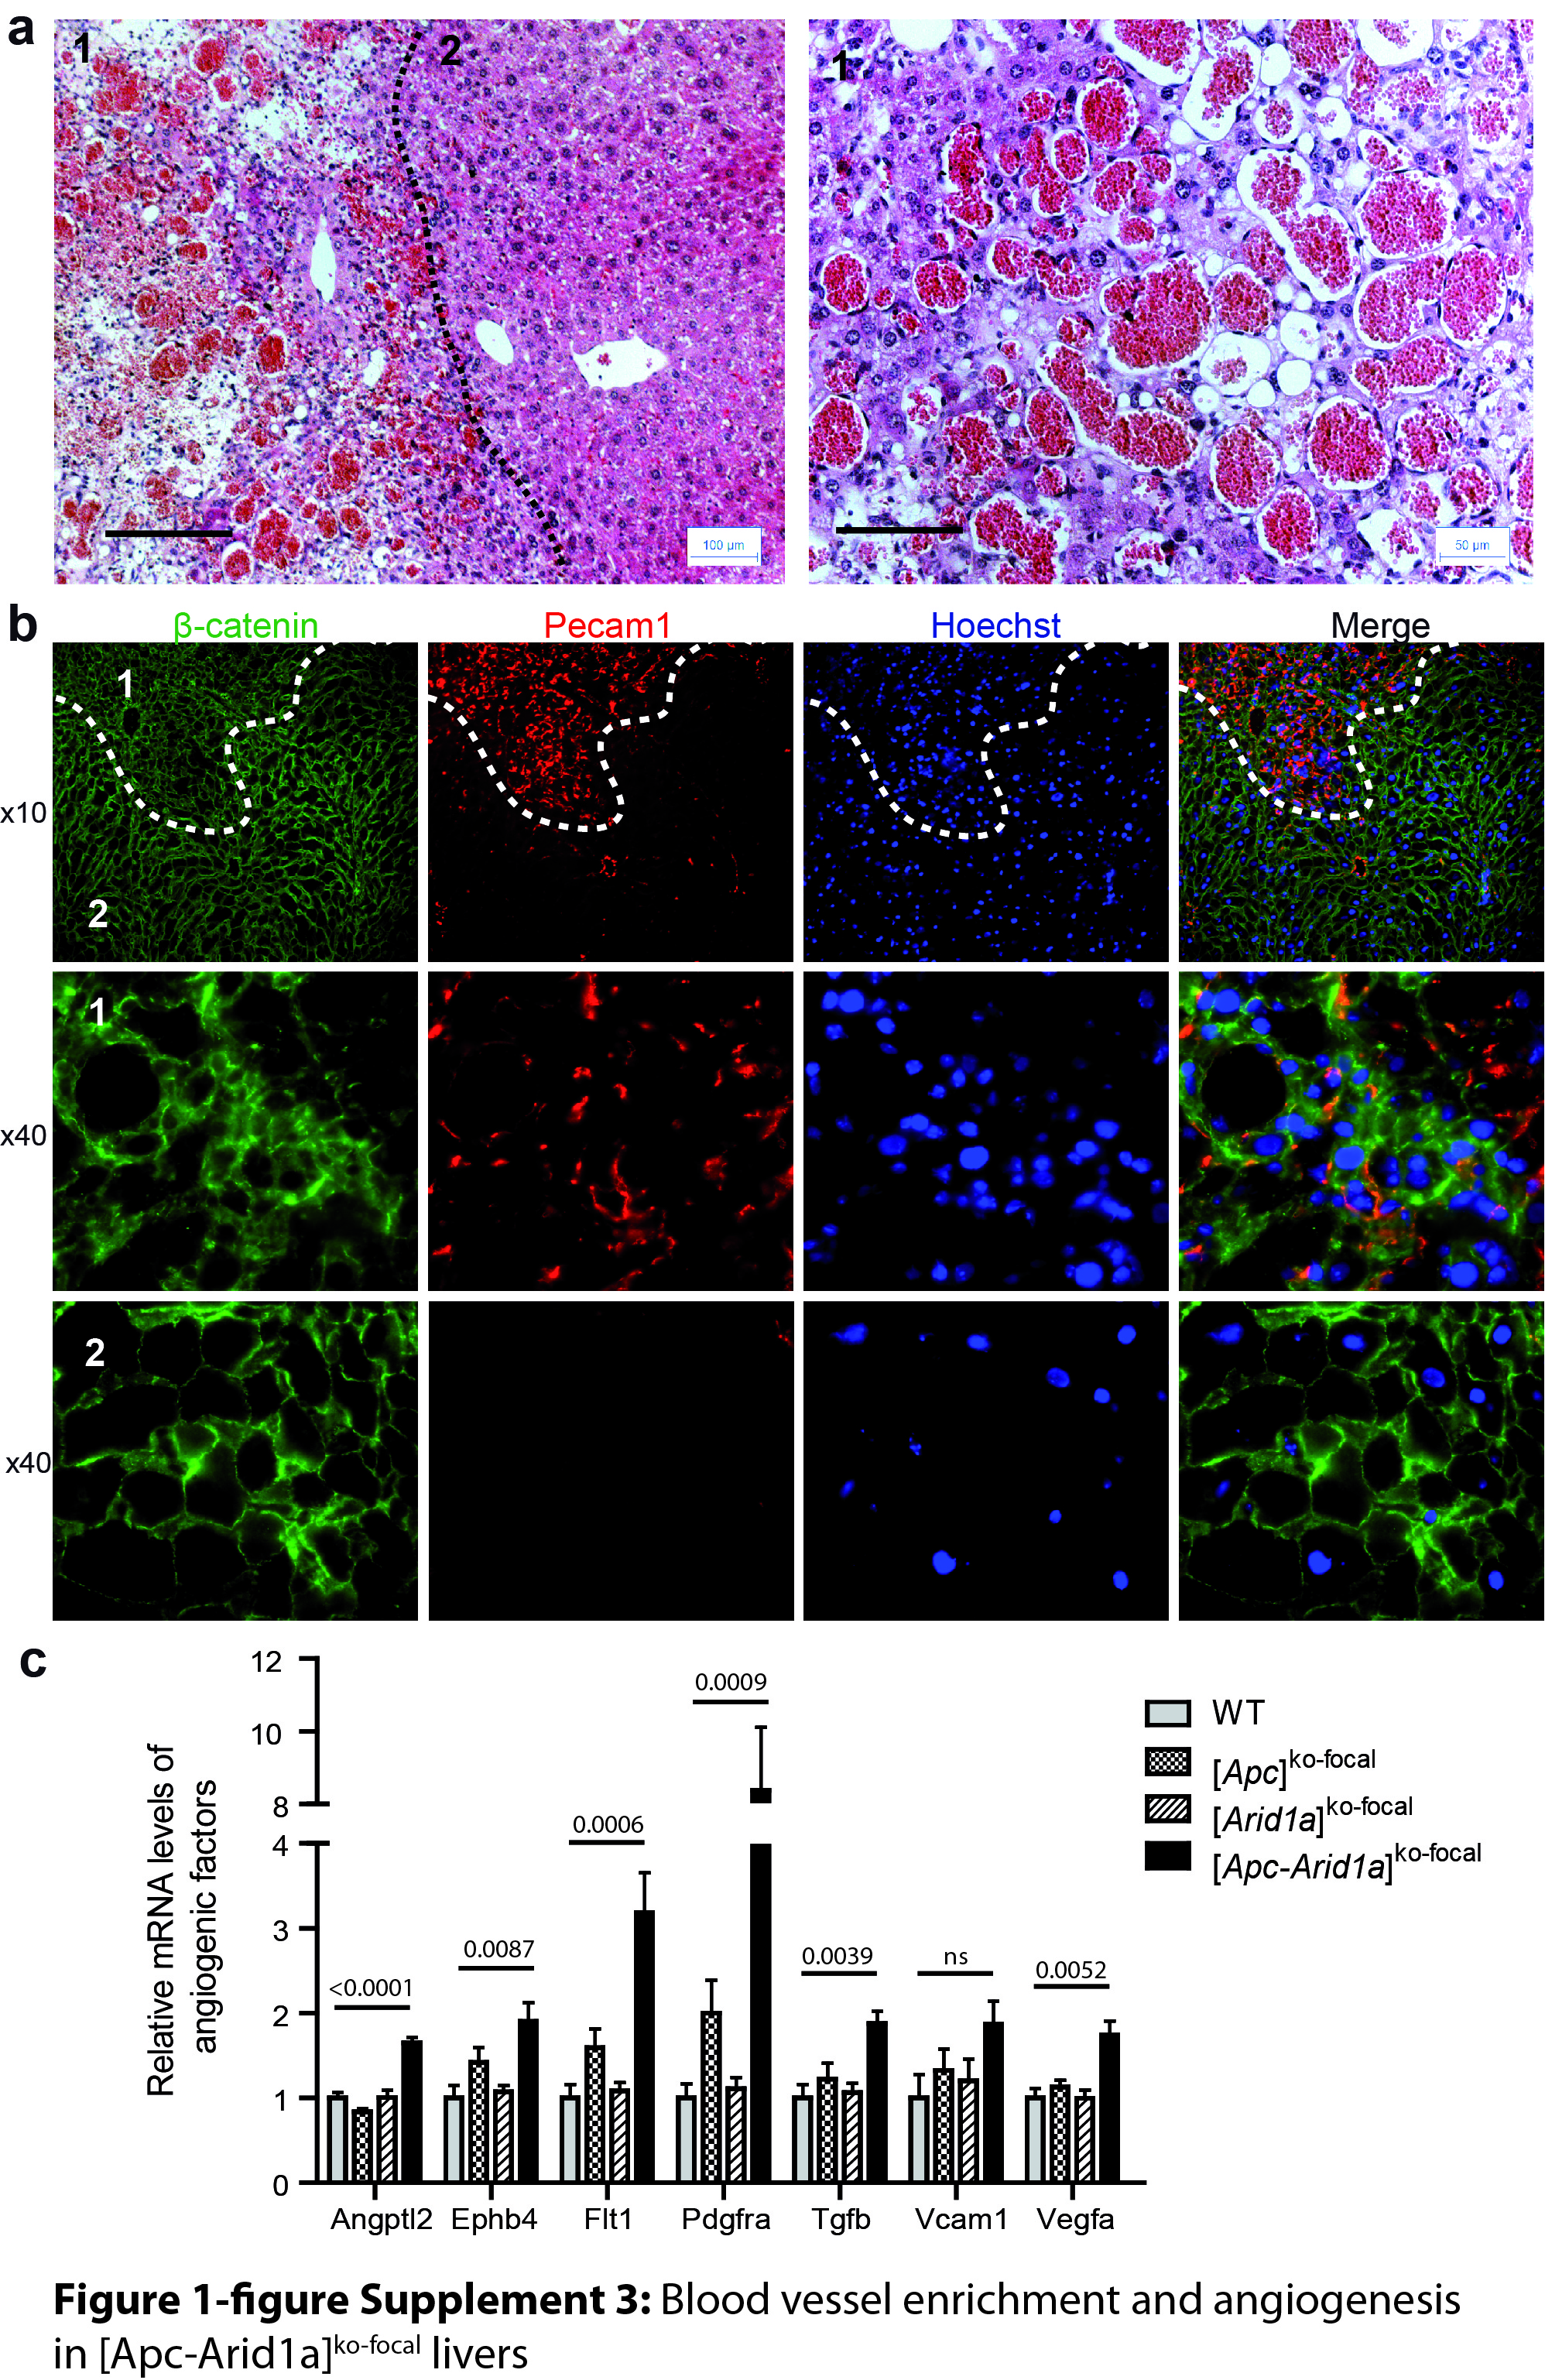

Supplement: supp [file elife-53550-supp-v1.zip › elife_poa_e53550_Figure_1_figure_supplement_3.jpg]

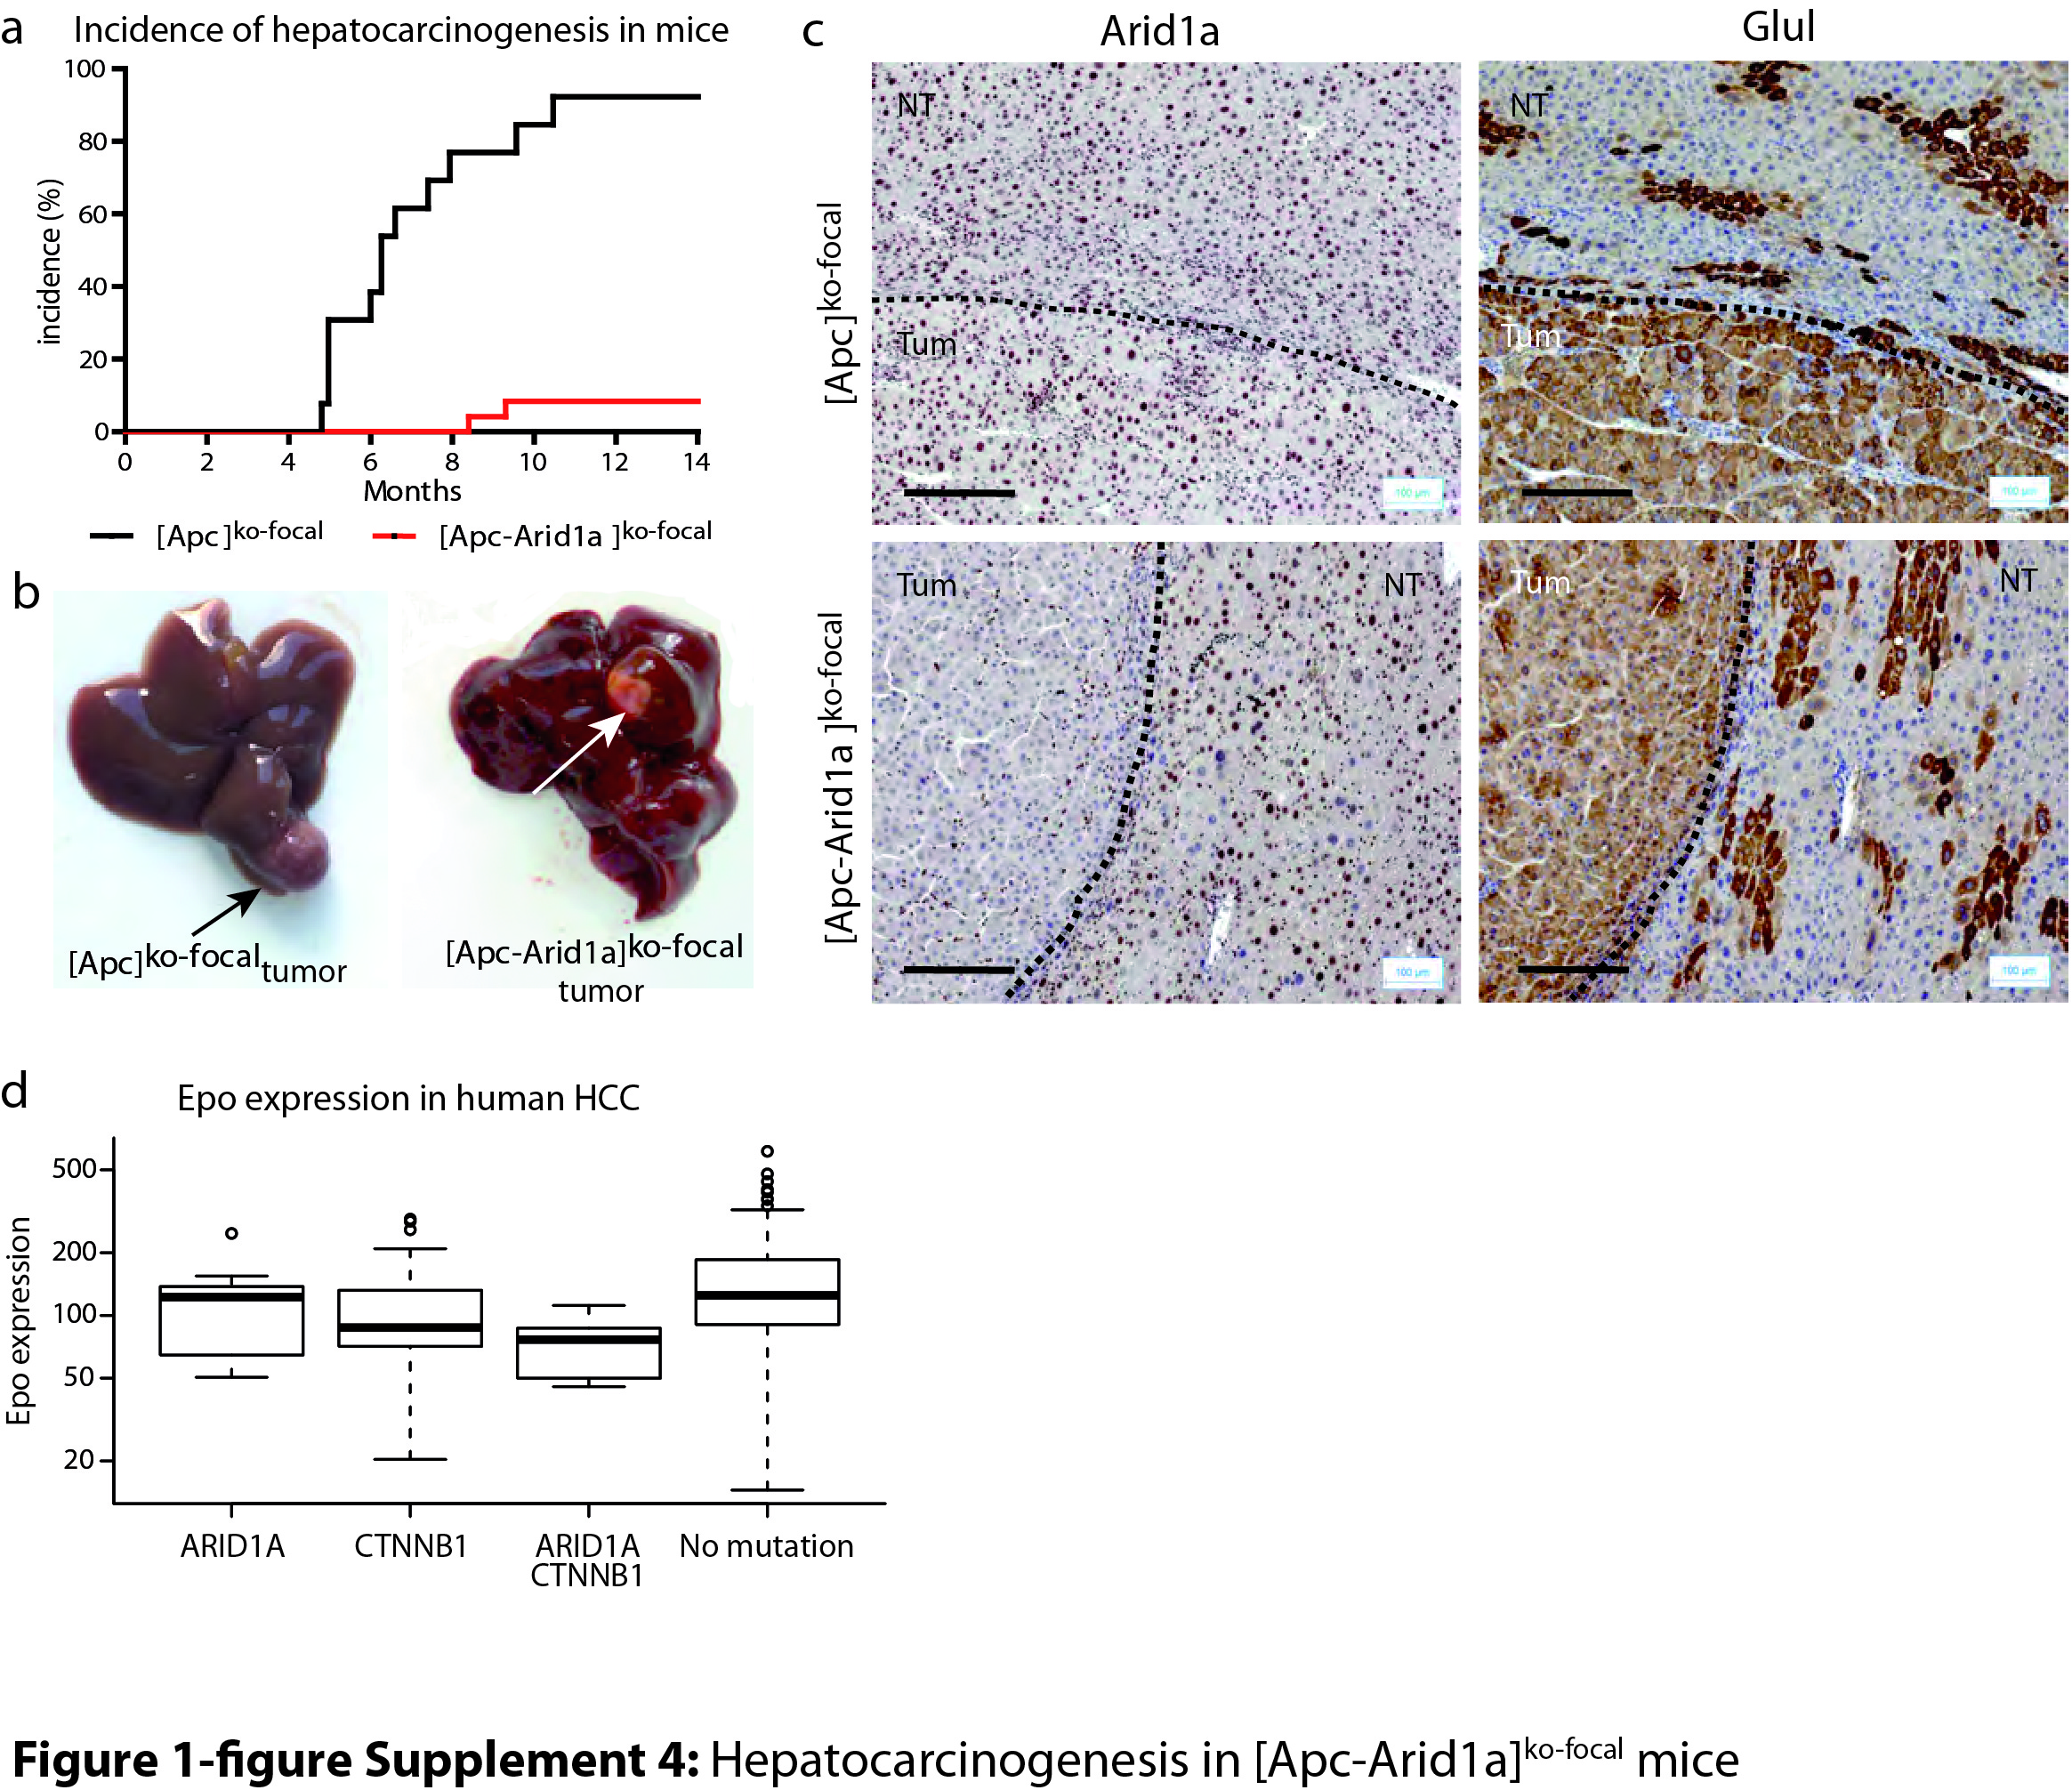

Supplement: supp [file elife-53550-supp-v1.zip › elife_poa_e53550_Figure_1_figure_supplement_4.jpg]

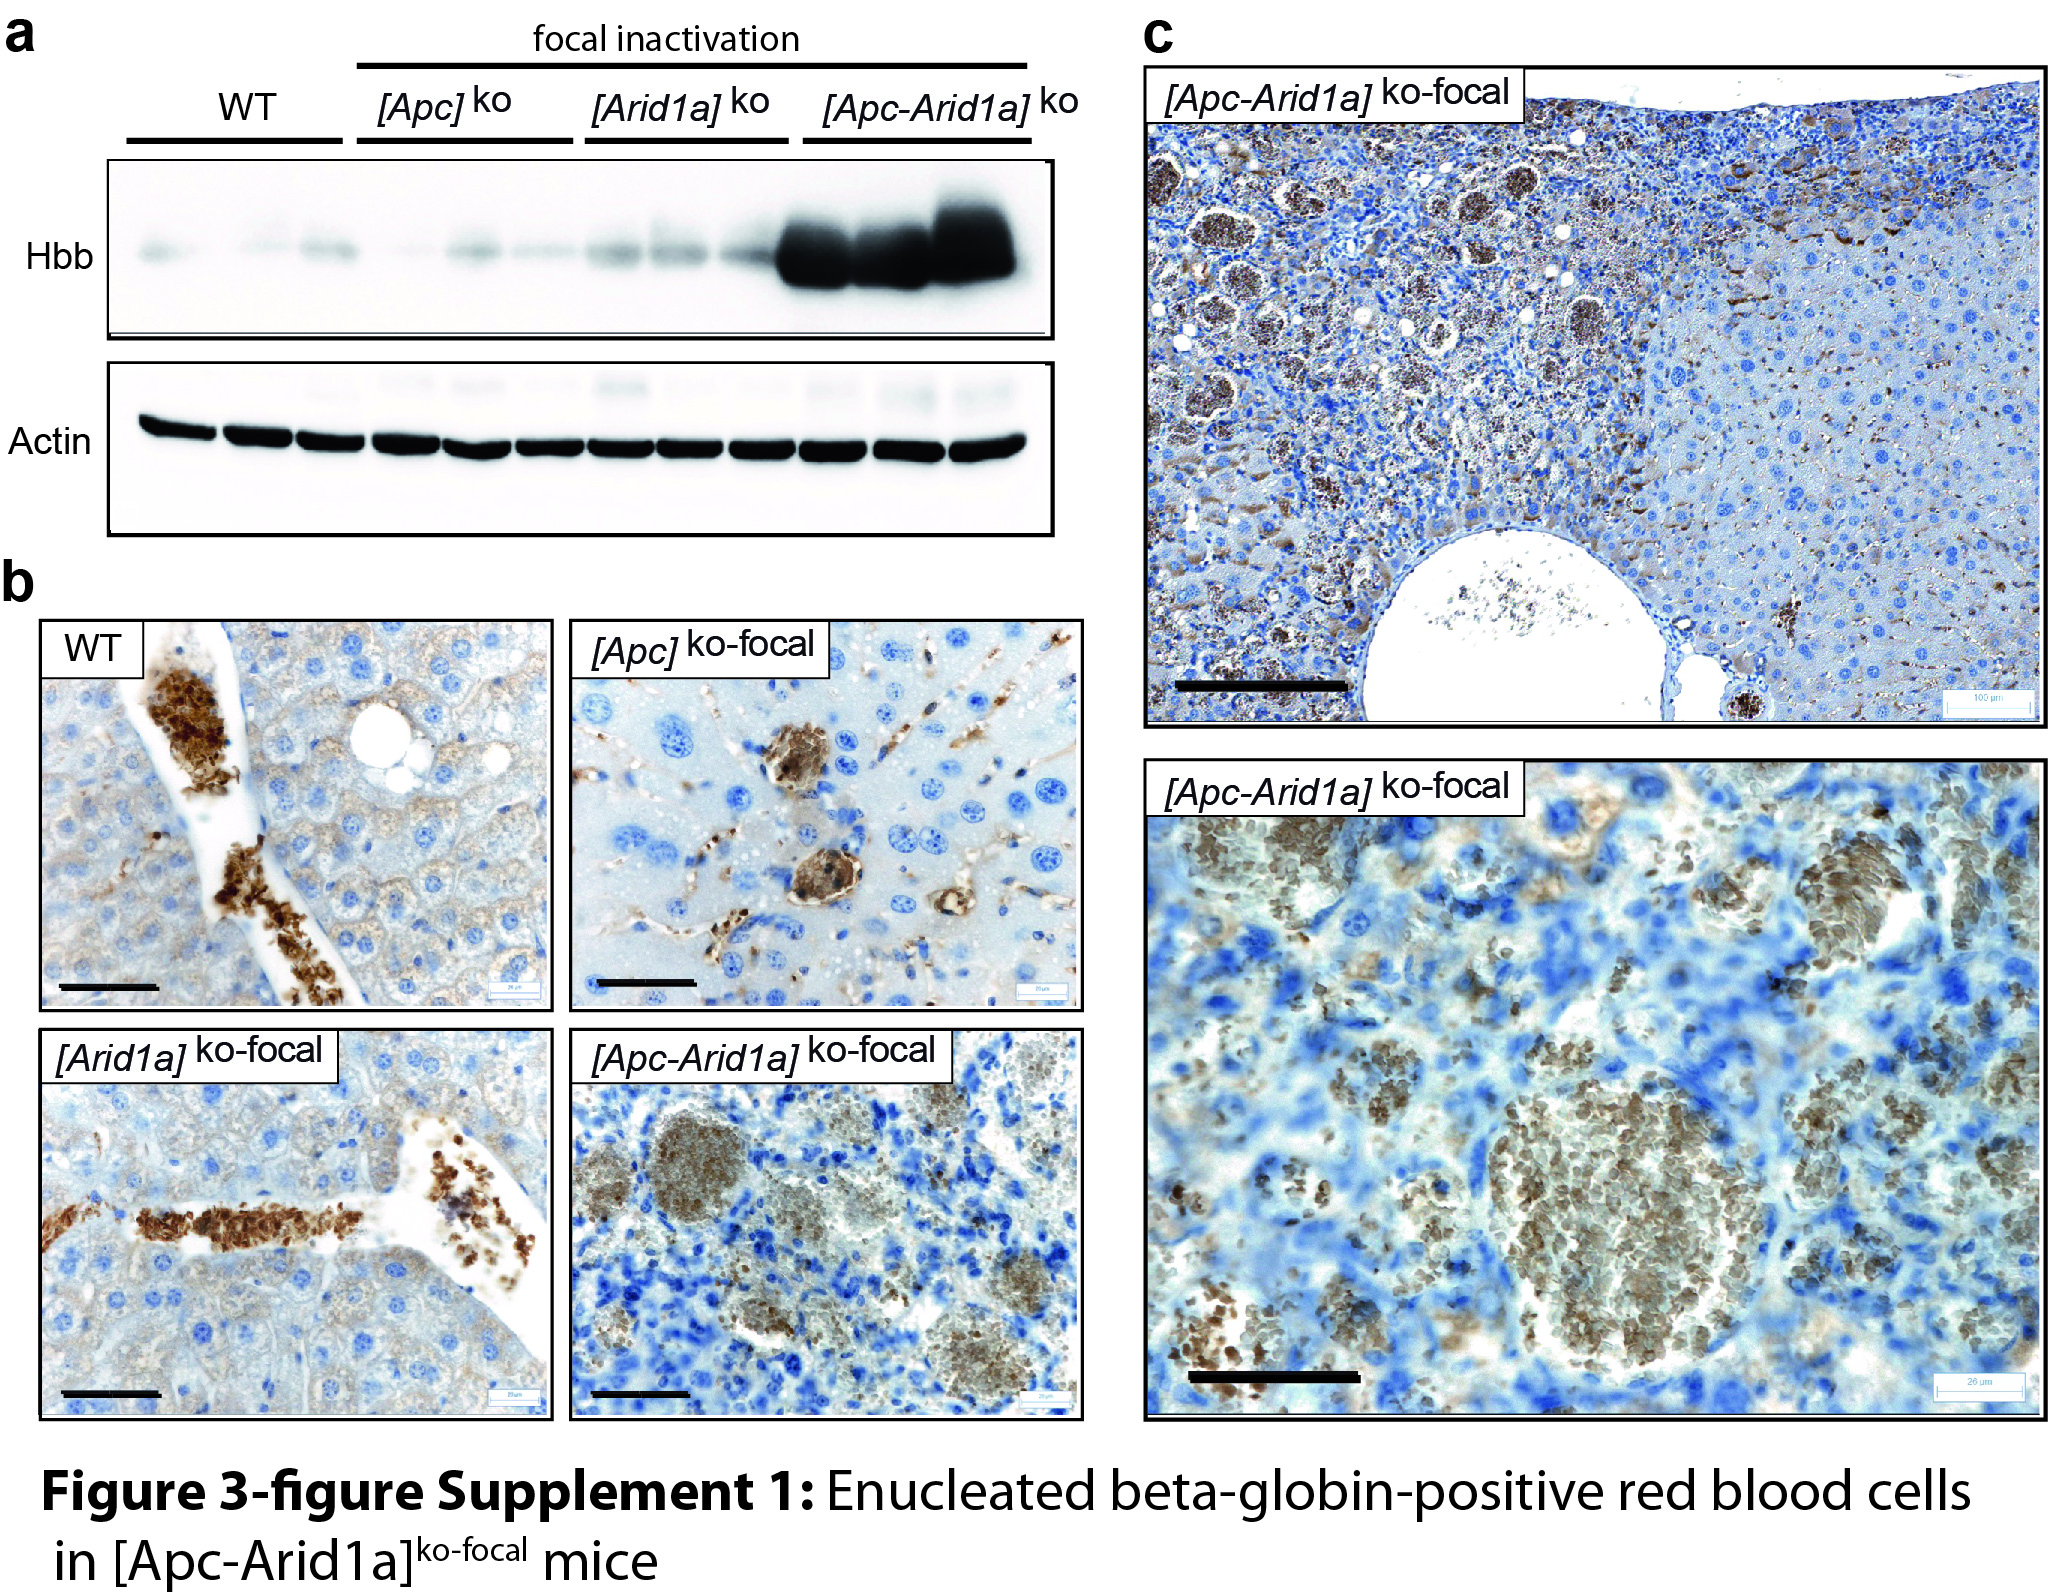

Supplement: supp [file elife-53550-supp-v1.zip › elife_poa_e53550_Figure_3_figure_supplement_1.jpg]

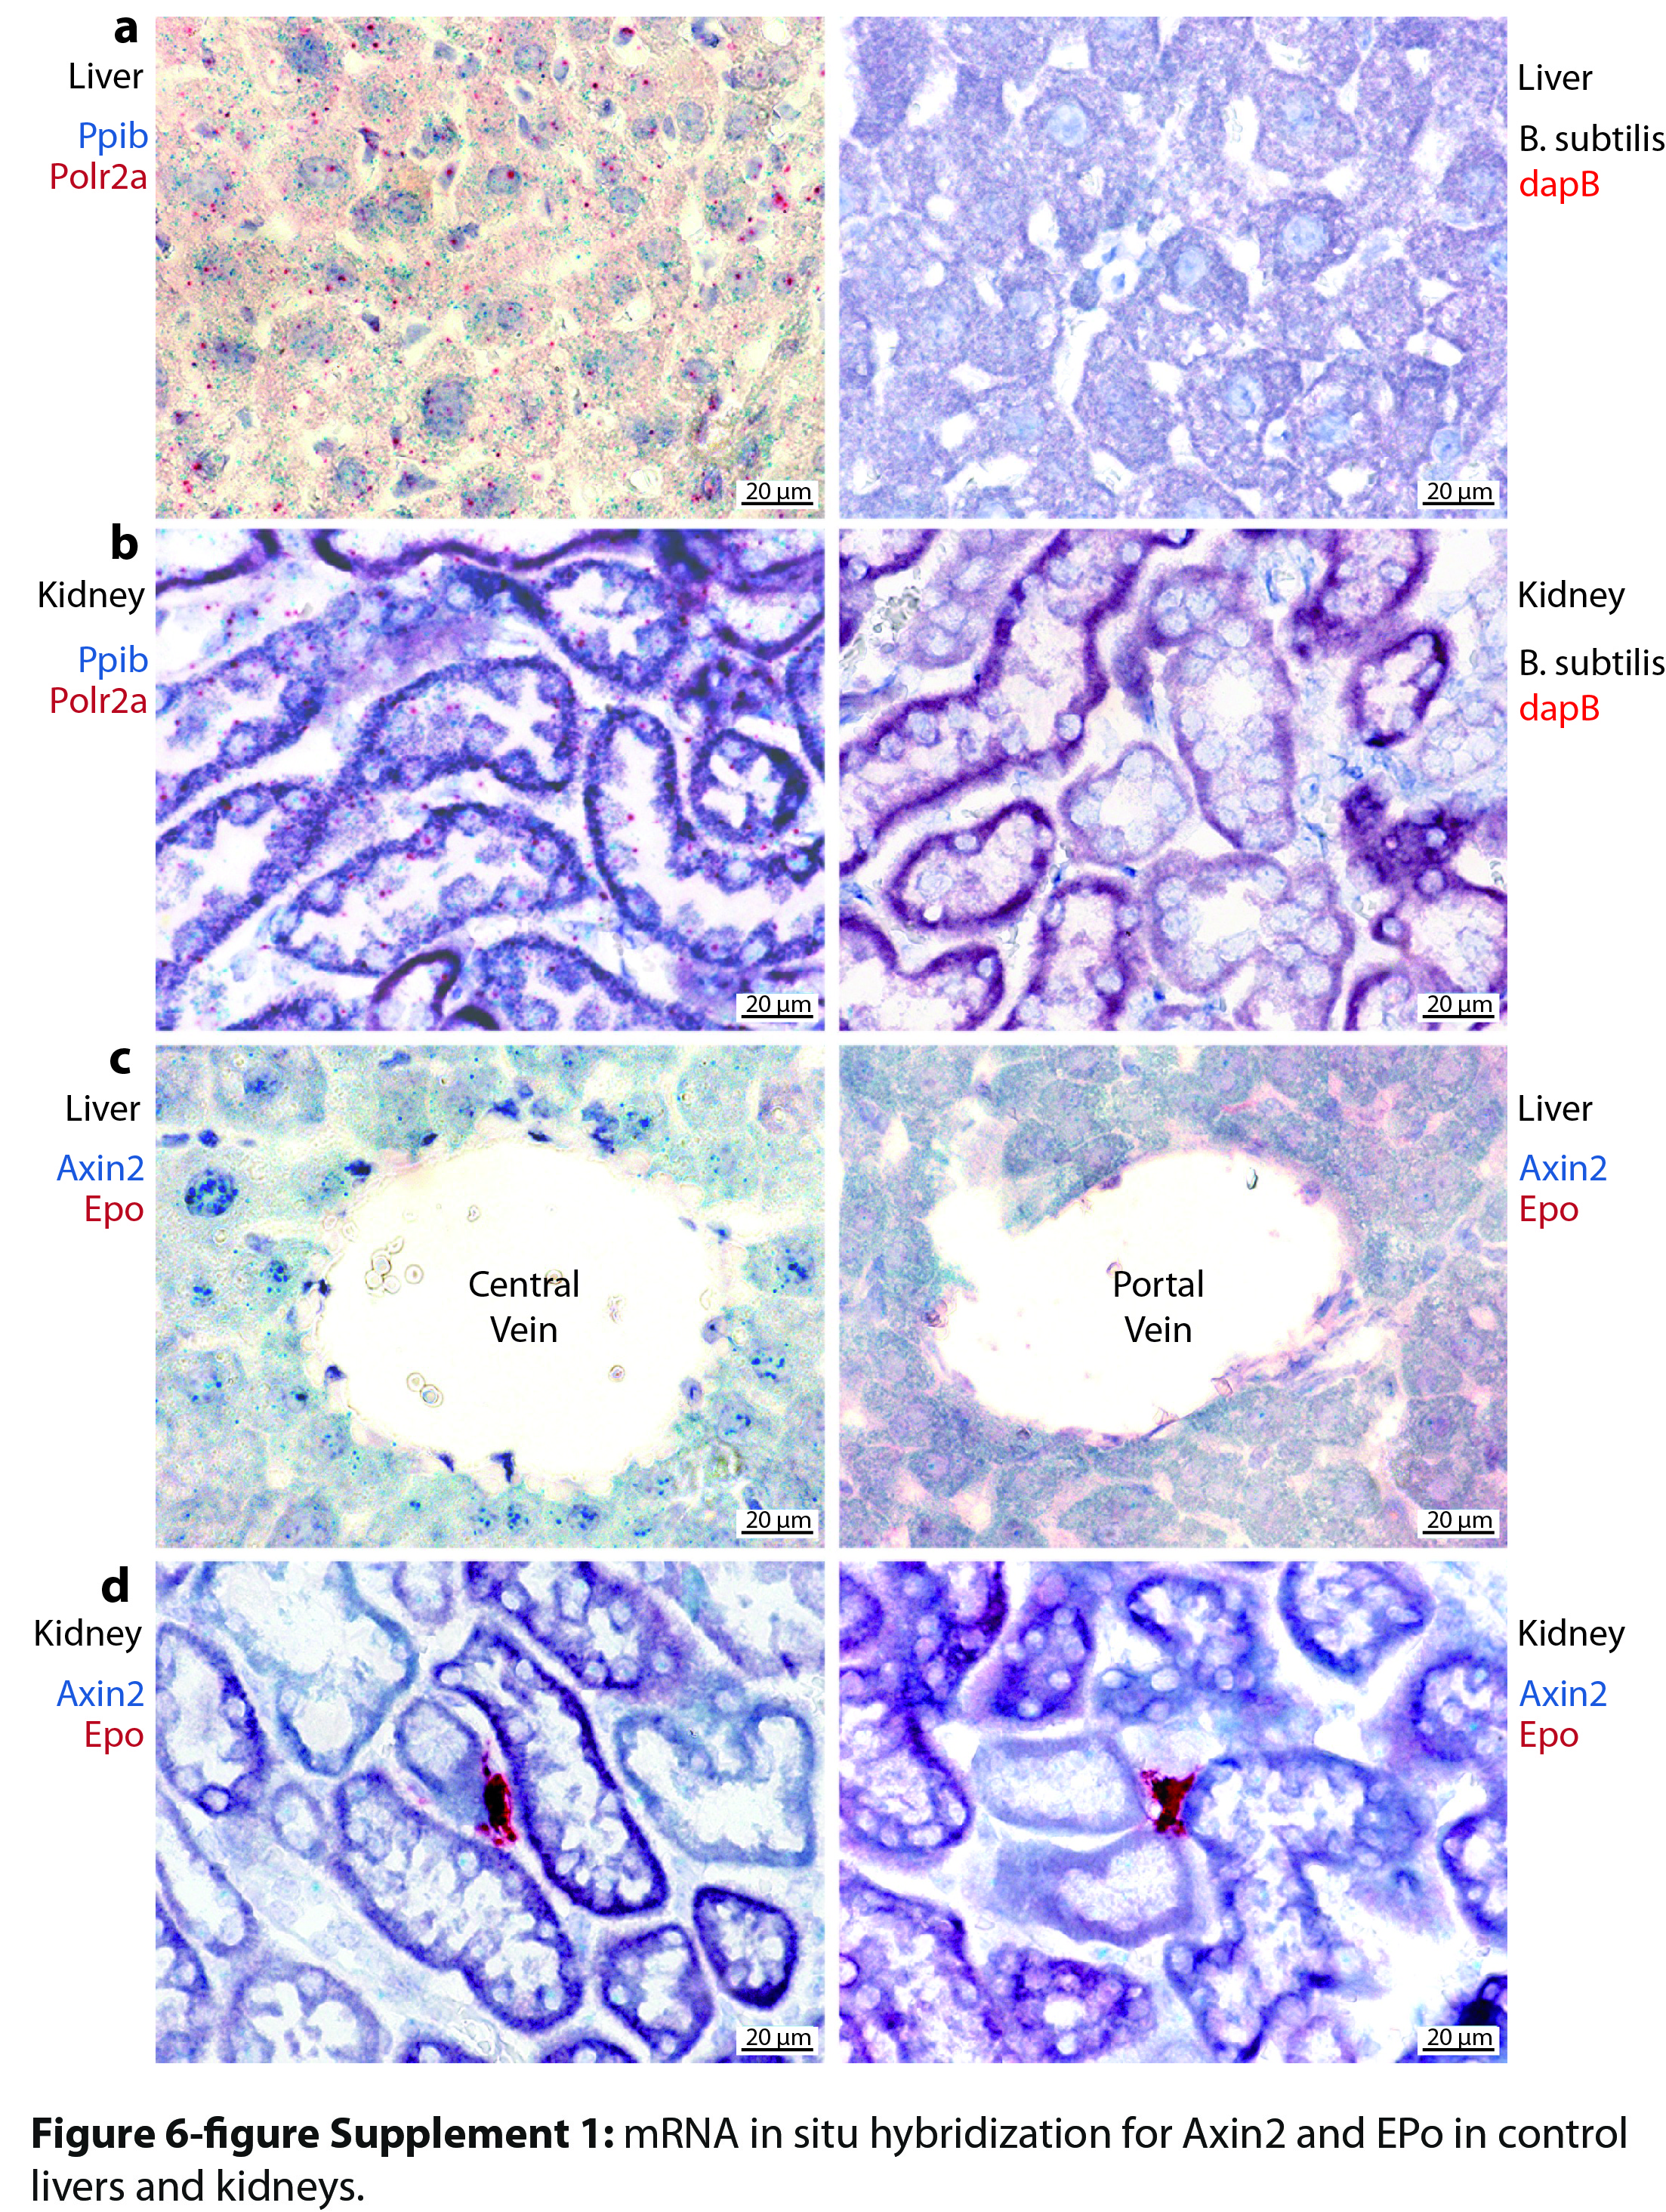

Supplement: supp [file elife-53550-supp-v1.zip › elife_poa_e53550_Figure_6_figure_supplement_1.jpg]

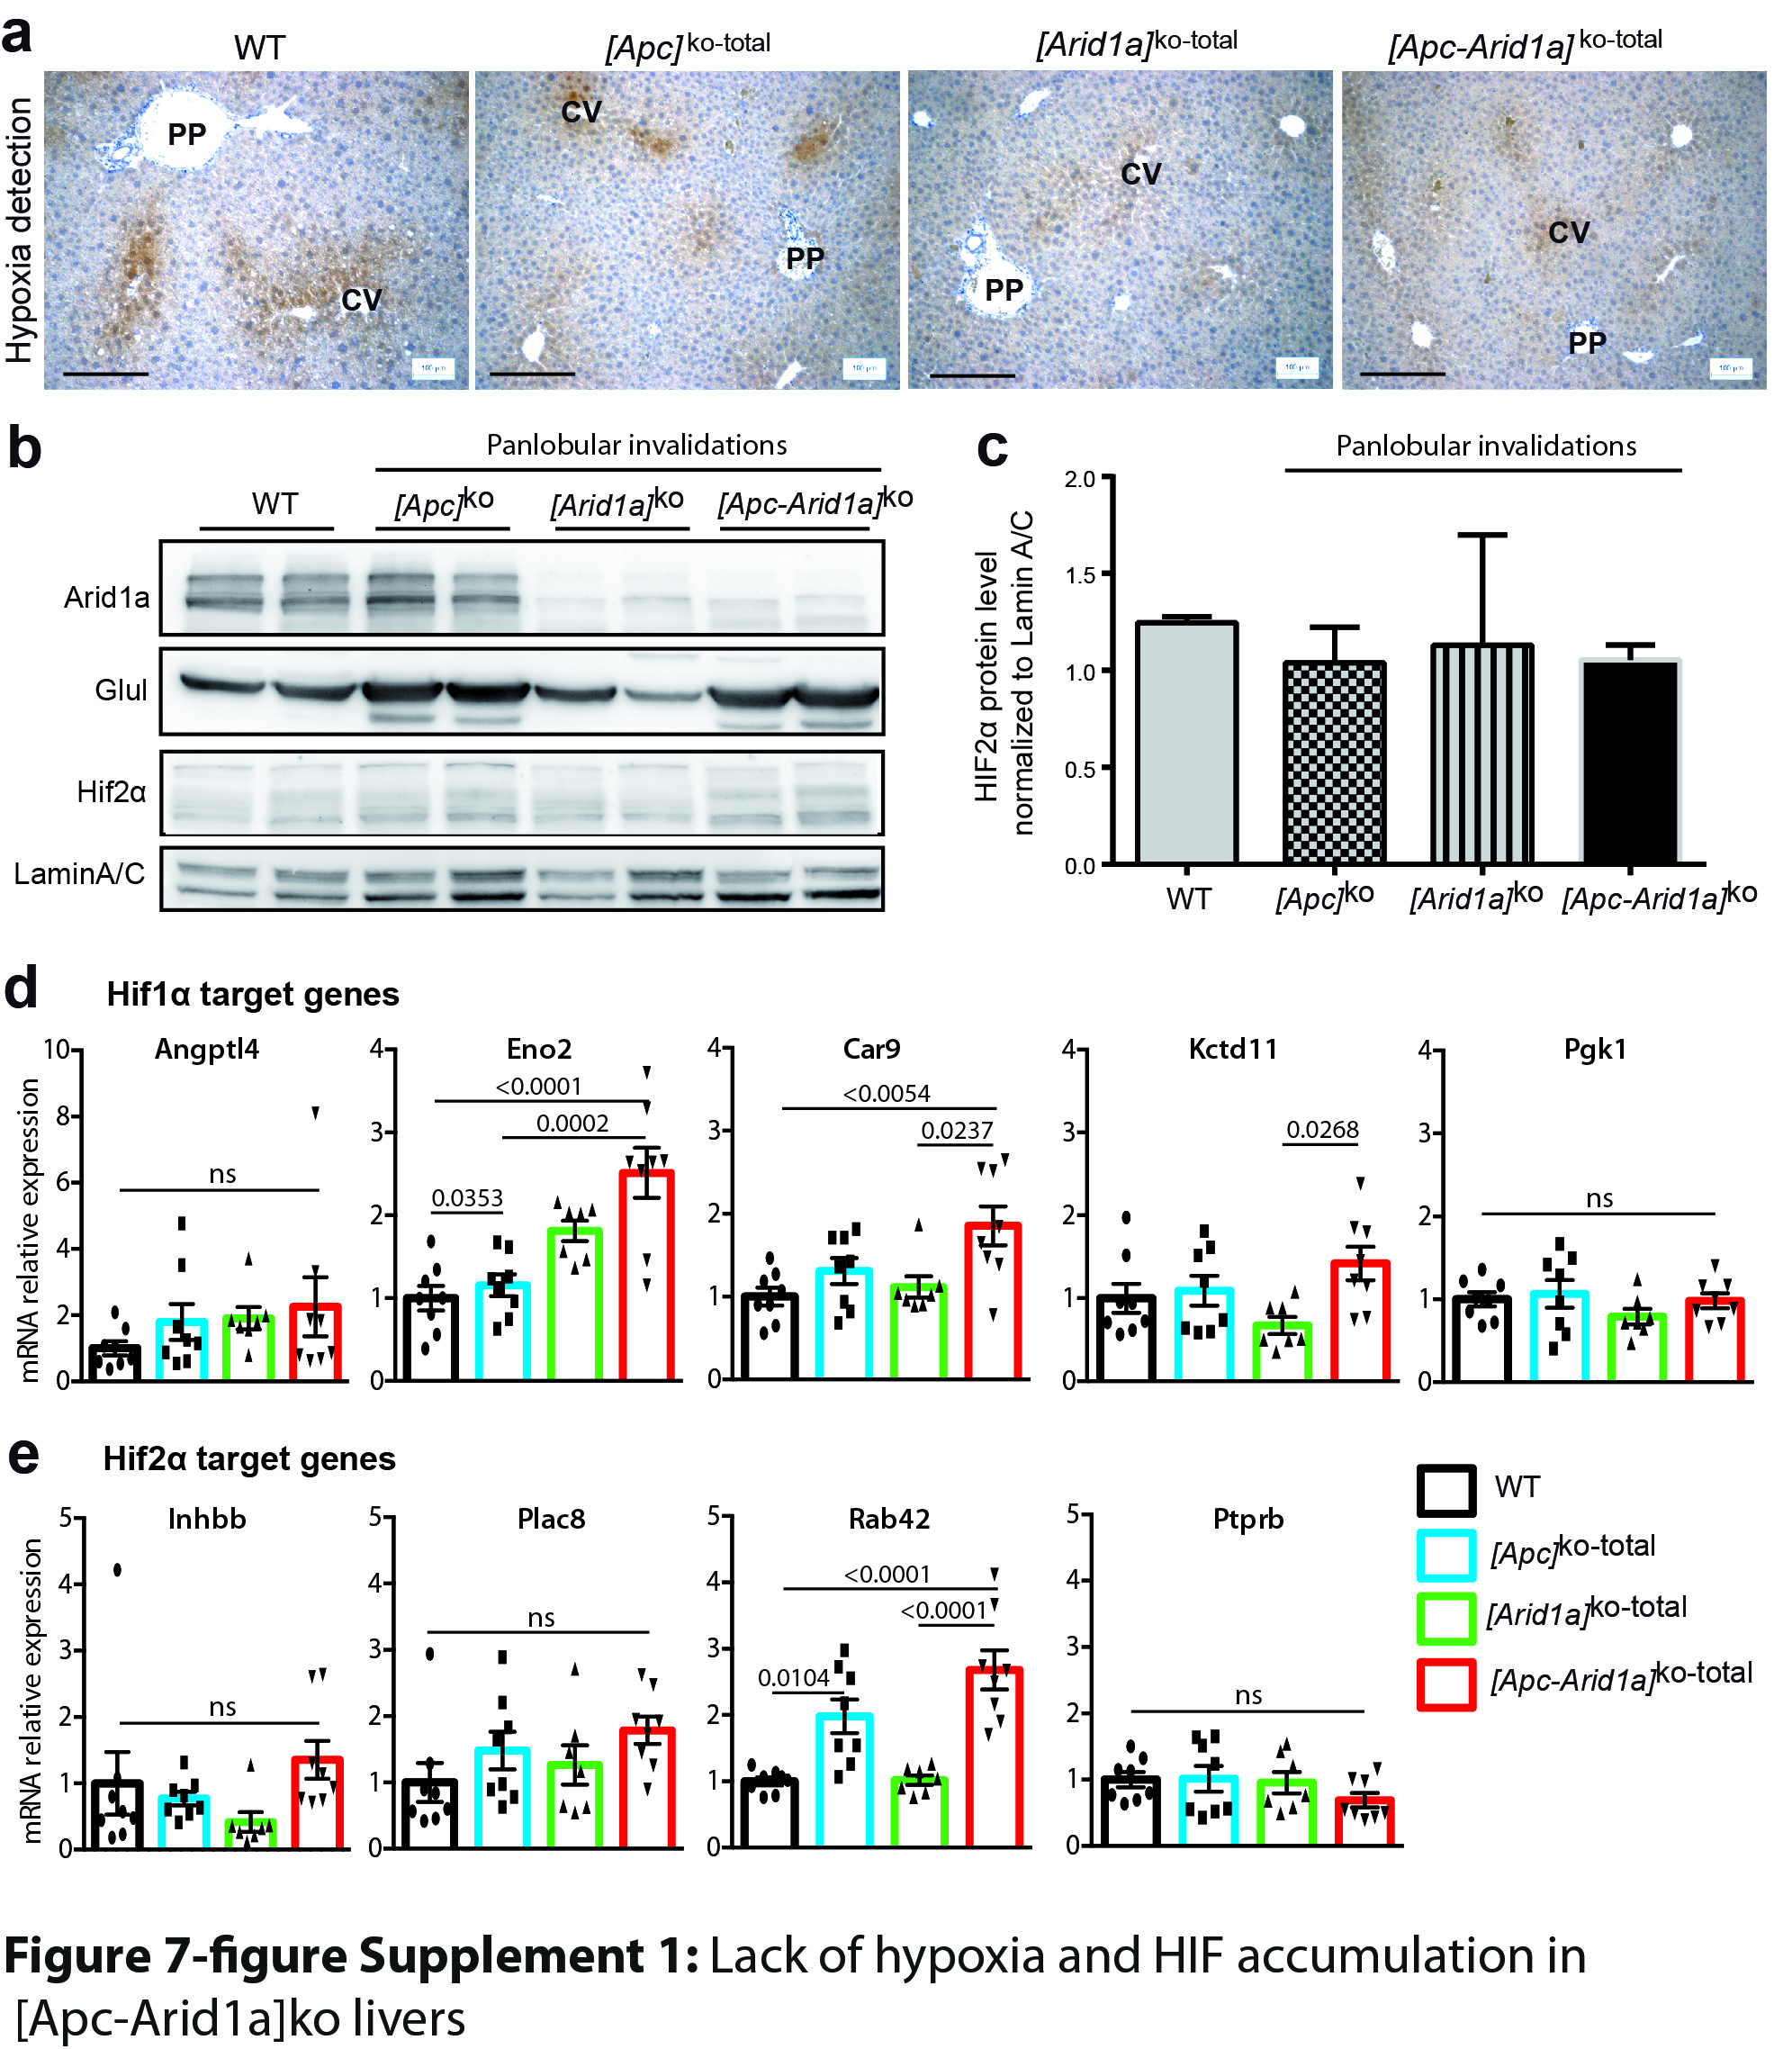

Supplement: supp [file elife-53550-supp-v1.zip › elife_poa_e53550_Figure_7_figure_supplement_1.jpg]

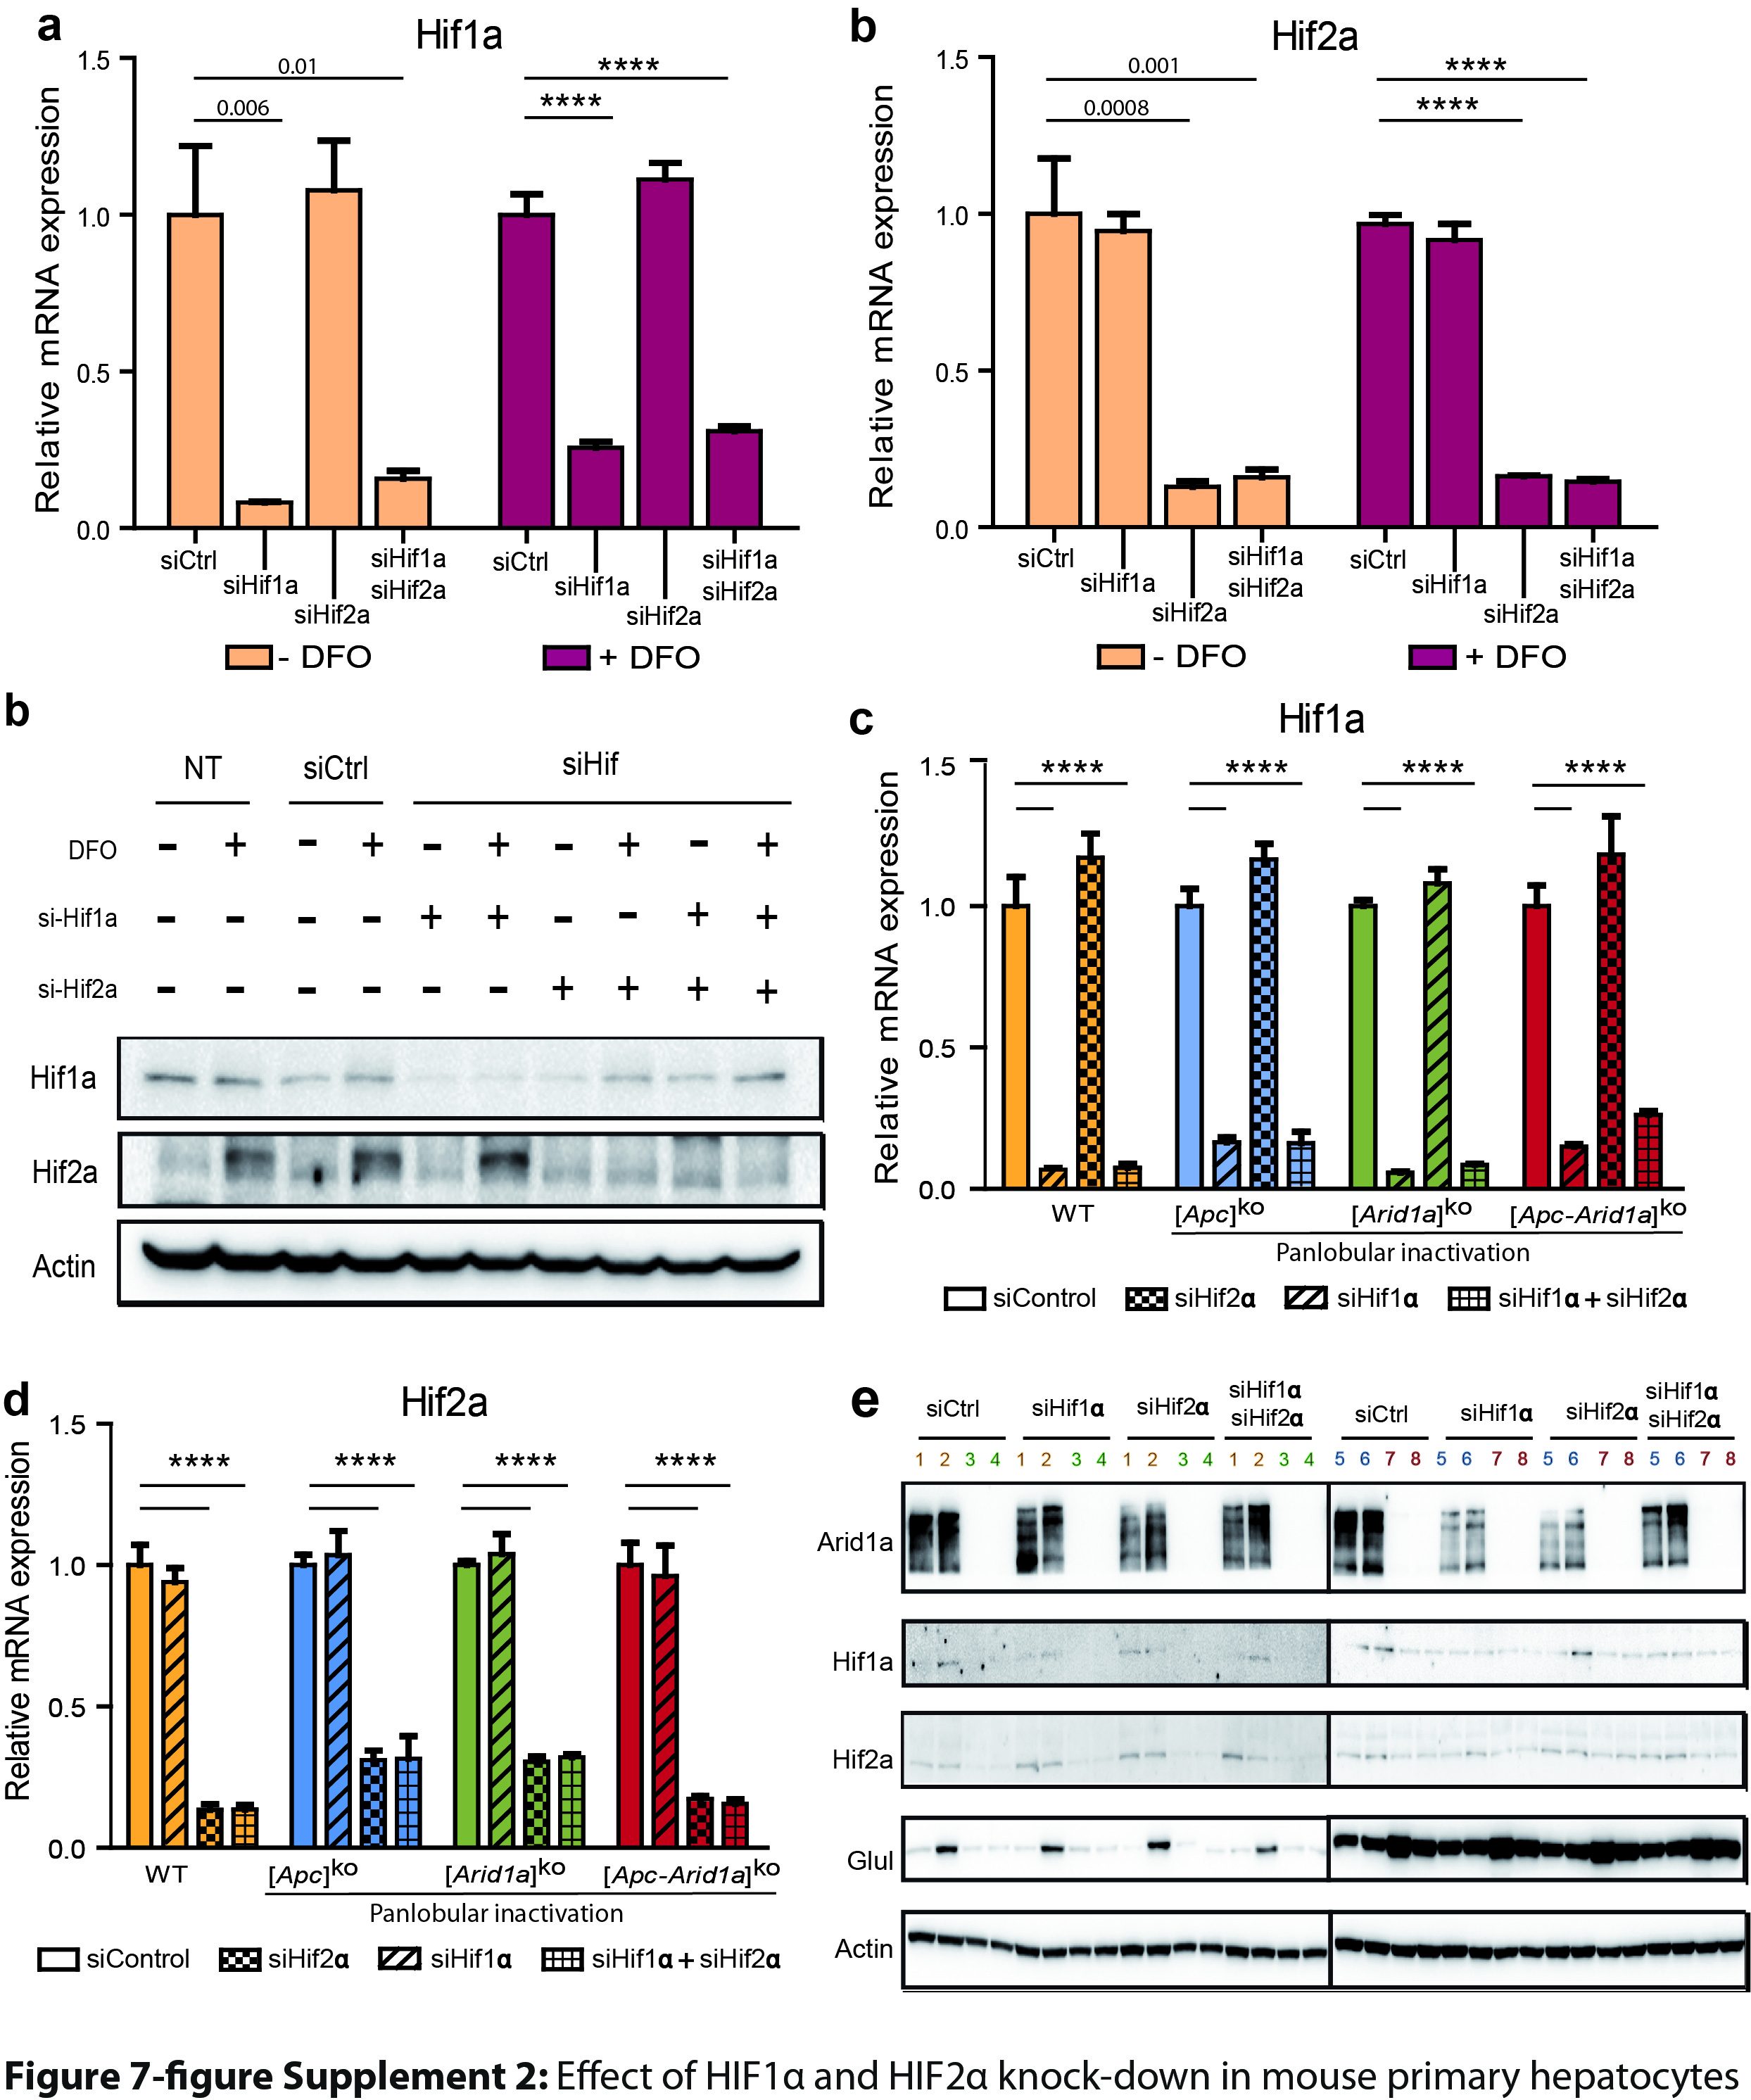

Supplement: supp [file elife-53550-supp-v1.zip › elife_poa_e53550_Figure_7_figure_supplement_2.jpg]

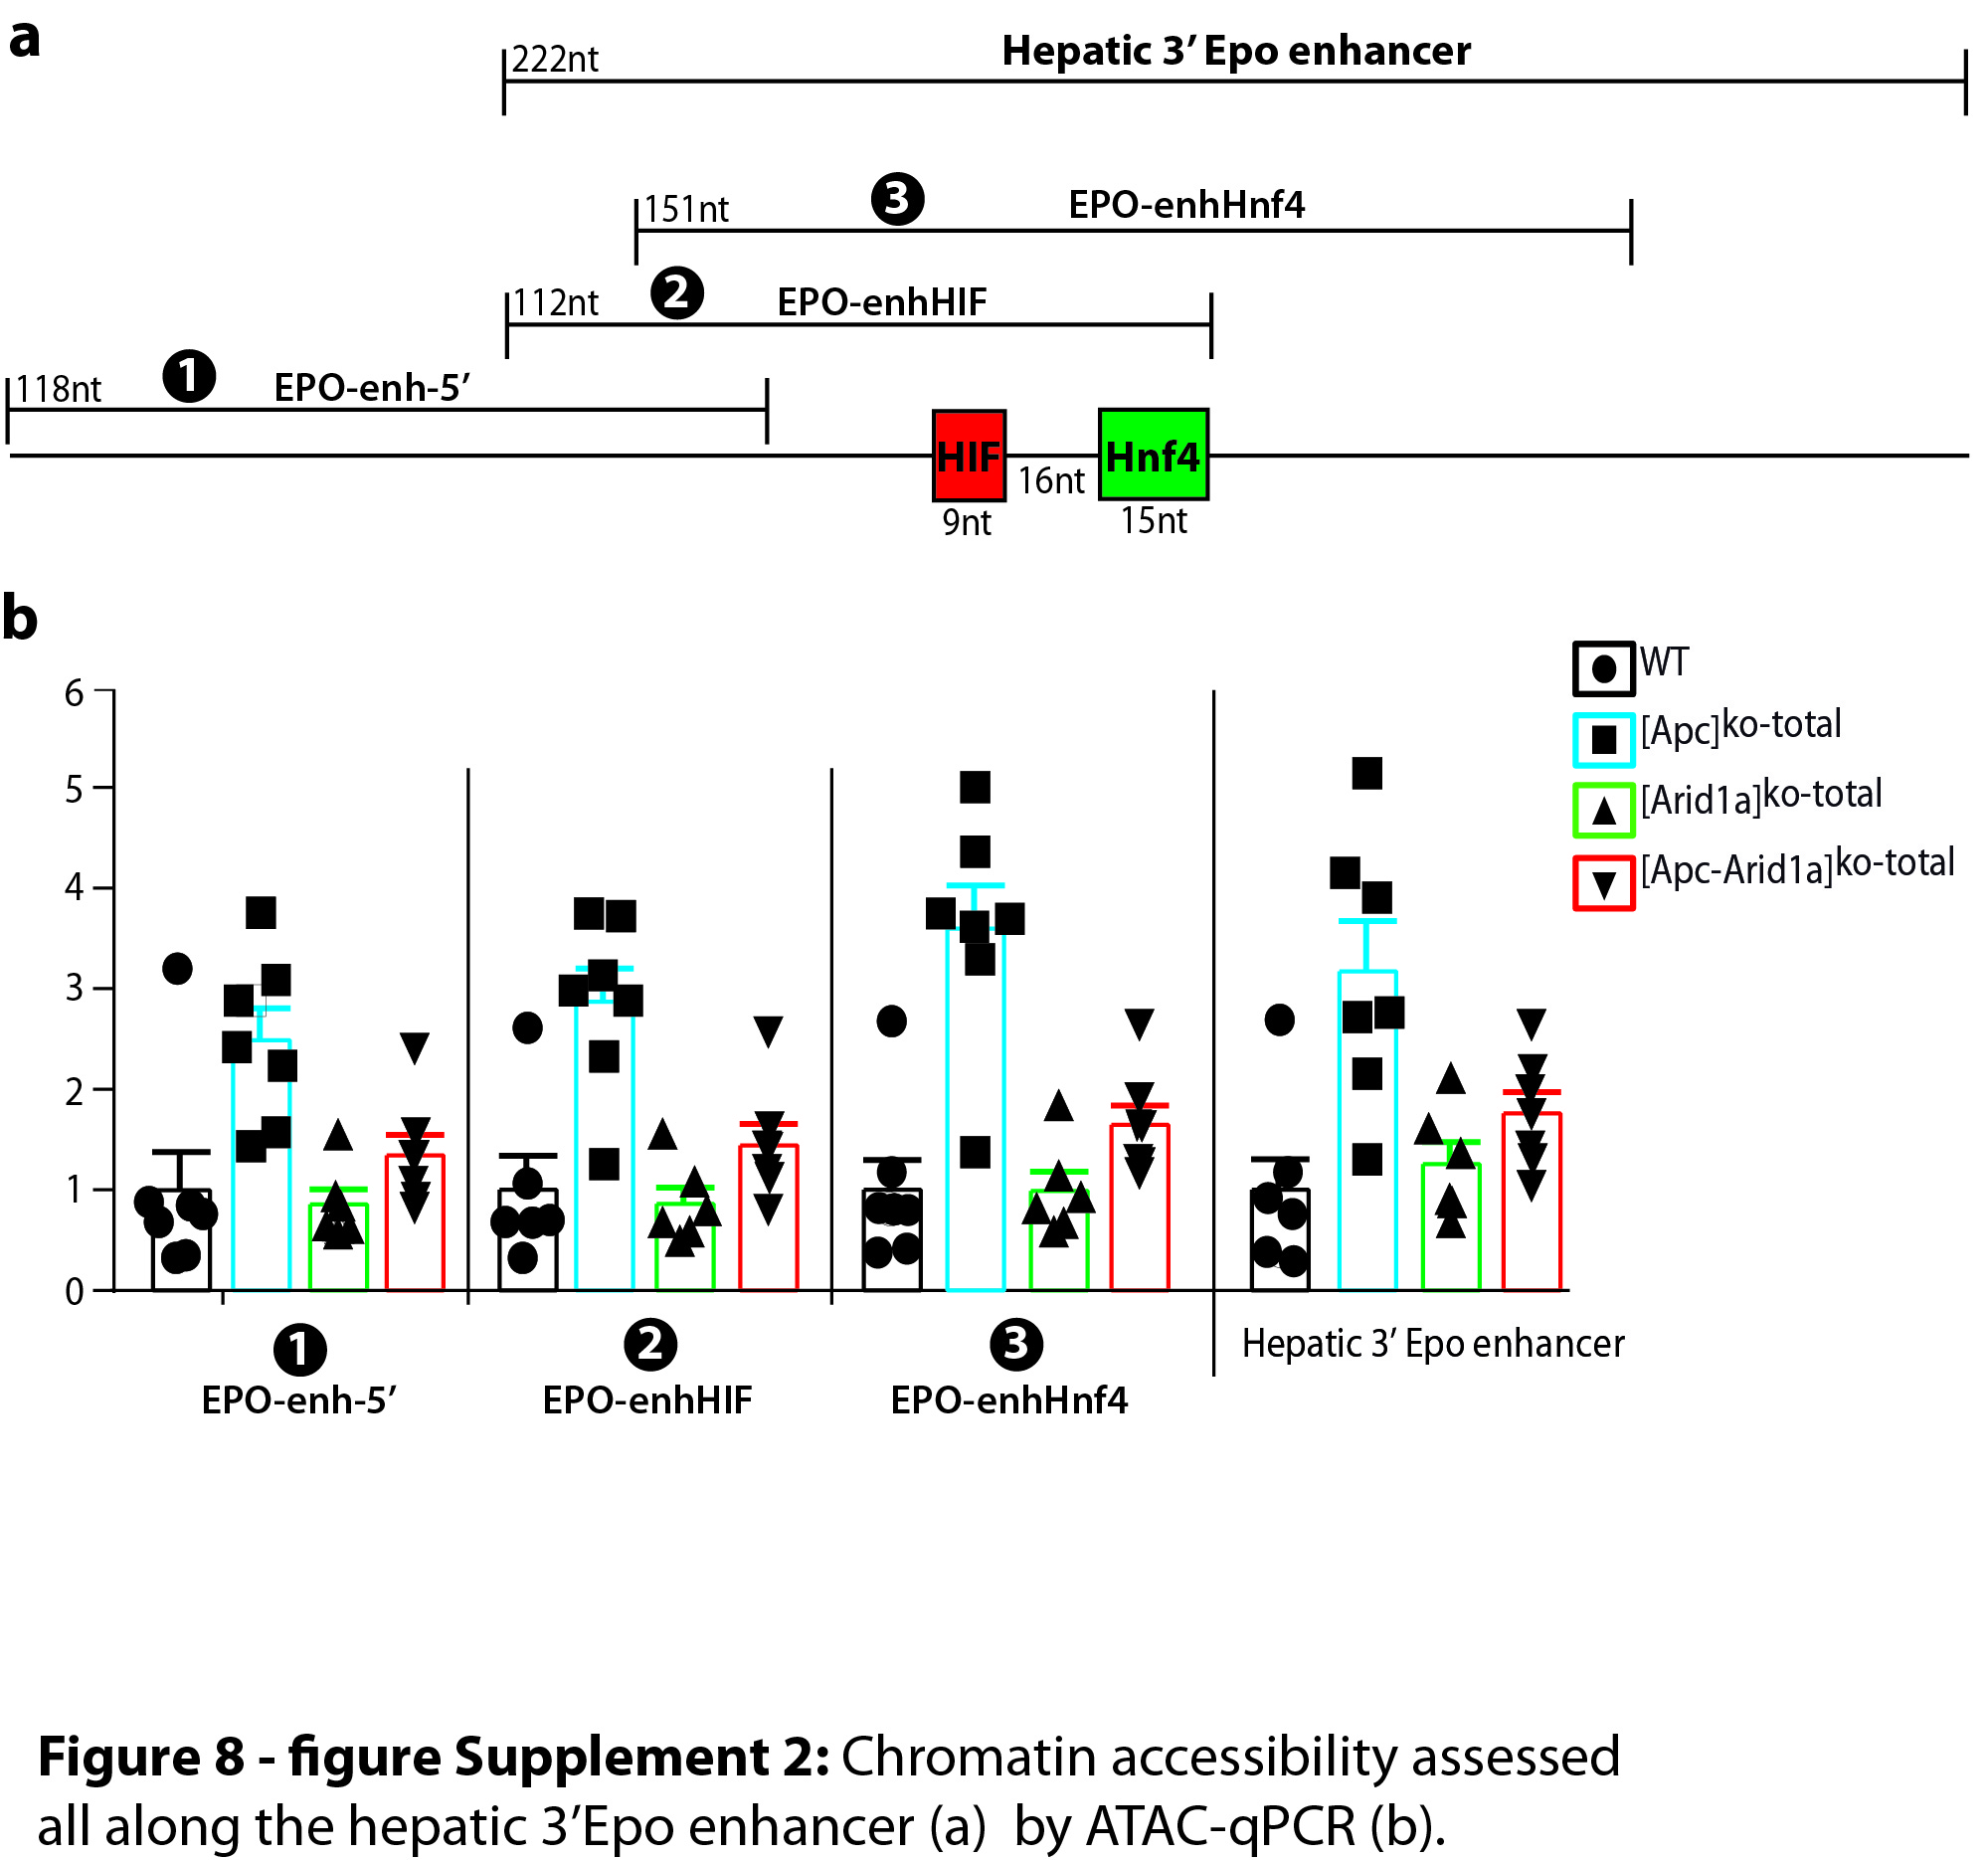

Supplement: supp [file elife-53550-supp-v1.zip › elife_poa_e53550_Figure_8_figure_supplement_2.jpg]
